# Supplementary material for: Novel Method for Differentiating Histological Types of Gastric Adenocarcinoma by Using Confocal Raman Microspectroscopy
Source: PLoS One. 2016 Jul 29;11(7):e0159829. doi: 10.1371/journal.pone.0159829 (PMC4966957; doi:10.1371/journal.pone.0159829)
Supplement: S1 File — The original spectra and corresponding histological subtypes. (XLSX) [file pone.0159829.s001.xlsx]

## Sheet: 工作表1
	signet	signet	signet	signet	signet	signet	signet	signet	signet	signet	signet	signet	signet	signet	signet	signet	signet	signet	signet	signet	signet			tubual	tubual	tubual	tubual	tubual	tubual	tubual	tubual	tubual	tubual	tubual	tubual	tubual	tubual	tubual	tubual	tubual	tubual	tubual	tubual	tubual			papillary1	papillary2	papillary3
500	232.301	223.132	263.734	255.299	249.128	271.974	250.74	238.861	236.081	216.245	216.869	186.77	220.356	210.126	242.917	236.459	237.149	245.705	196.313	206.661	231.052			165.884	161.379	170.203	179.654	219.806	186.574	166.297	186.827	187.574	210.681	258.542	167.368	177.395	207.38	194.569	223.073	192.962	165.058	179.782	229.929	189.2			238.709	164.522	187.273
502.547	237.655	222.434	267.053	256.866	249.927	280.881	253.833	235.823	240.39	218.943	220.347	188.098	220.47	215.529	253.988	252.369	240.562	250.372	196.541	211.193	235.988			167.81	162.706	176.17	175.818	218.557	184.422	166.565	182.689	188.995	219.115	277.101	165.232	178.737	207.89	193.513	226.566	195.804	167.446	188.493	239.044	195.62			238.265	166.854	189.67
505.093	237.362	224.44	266.717	257.206	253.196	284.042	251.829	237.613	242.496	219.956	221.556	189.693	224.076	215.009	249.846	254.741	240.17	250.74	198.418	210.611	237.434			170.238	165.457	173.67	174.873	214.668	182.348	167.698	185.924	191.17	220.581	278.917	163.011	176.498	205.717	192.836	226.466	192.366	163.65	187.648	236.113	194.229			234.84	173.013	190.166
507.64	236.194	223.958	264.154	258.258	253.01	285.447	249.982	238.316	237.826	218.038	222.761	189.784	223.605	215.002	248.87	253.095	240.531	251.416	199.099	209.312	236.734			167.526	162.331	171.589	176.415	211.634	184.12	167.016	182.929	191.395	218.756	275.081	166.813	176.427	204.968	195.855	223.468	190.307	161.995	185.86	233.206	192.207			233.911	174.702	190.317
510.186	237.918	222.499	264.253	260.055	254.353	285.256	251.654	238.031	233.049	217.908	224.111	189.334	222.337	214.838	249.063	250.03	239.822	251.96	199.574	208.347	236.683			165.074	159.415	171.974	177.13	213.401	187.939	167.156	182.181	190.49	216.312	273.883	169.741	179.781	206.205	197.279	221.35	191.243	164.34	185.739	234.509	192.175			233.136	171.653	187.712
512.733	241.321	222.746	268.09	261.801	257.666	284.389	254.648	238.386	235.373	220.169	225.746	189.182	223.639	214.318	248.805	247.126	238.622	252.305	200.277	208.367	237.801			166.296	160.898	173.535	176.116	216.85	189.937	168.538	186.138	191.117	214.787	275.205	169.037	182.594	208.022	194.539	221.164	193.532	167.584	186.64	238.081	193.862			232.387	167.631	185.131
515.279	241.538	225.865	271.161	262.576	256.89	285.033	253.081	240.346	244.697	219.904	228.099	189.162	226.879	215.834	251.183	247.348	240.899	253.676	200.361	210.152	238.265			168.627	164.069	173.685	175.725	213.655	187.415	167.955	185.691	194.913	214.321	272.19	169.351	179.202	208.841	191.816	221.192	194.133	166.749	186.155	238.966	195.055			234.89	167.282	189.272
517.826	243.626	228.63	267.55	262.735	256.421	286.11	252.638	241.31	235.164	217.458	230.016	188.96	226.606	222.554	250.044	259.311	244.364	254.058	201.846	212.929	240.599			167.31	162.147	172.722	175.919	211.55	187.422	164.48	181.266	191.713	213.836	270.7	168.039	179.994	212.985	200.012	227.941	192.76	167.045	183.166	241.97	193.791			235.73	168.651	189.698
520.372	238.522	227.308	268.172	262.225	257.154	283.487	258.777	245.252	233.736	219.273	227.574	191.49	227.318	218.45	248.725	253.094	241.996	256.285	202.383	212.455	239.226			169.527	164.039	170.687	178.717	215.357	187.87	166.155	184.97	194.426	212.378	256.306	167.877	178.062	212.096	201.398	224.625	194.495	165.452	184.262	240.058	190.453			237.034	168.975	191.763
522.919	238.13	227.446	270.205	266.131	257.896	284.595	257.455	243.596	233.047	221.818	225.918	192.23	228.622	218.604	251.74	253.701	244.268	259.766	205.753	212.009	242.711			168.022	164.754	172.305	179.332	212.735	189.482	166.441	183.615	195.425	214.861	259.438	171.178	180.864	210.892	200.752	229.503	194.856	165.315	188.12	242.609	191.596			234.502	169.663	189.84
525.465	239.376	226.958	269.446	268.869	260.059	286.532	254.901	241.159	234.904	221.196	224.503	192.206	229.882	218.625	253.337	253.538	244.949	261.772	206.191	212.114	244.121			168.141	164.972	174.058	179.205	211.982	188.638	166.784	181.644	196.201	218.075	263.203	172.814	181.415	210.373	200.383	233.01	194.429	166.397	188.24	243.908	193.927			234.753	171.562	189.148
528.012	239.841	225.328	268.888	270.556	262.071	286.811	253.281	241.635	238.204	220.529	224.145	192.725	230.68	217.195	253.178	252.062	243.836	262.704	206.165	211.922	243.235			170.587	165.807	173.881	180.795	217.878	189.739	170.319	182.829	196.972	218.686	261.788	173.486	181.961	211.403	200.622	232.853	195.476	168.963	187.7	242.287	194.741			237.616	171.676	189.684
530.558	239.713	224.08	271.908	273.613	262.14	286.167	252.594	244.015	239.364	224.138	225.818	194.077	231.054	216.548	254.315	254.641	244.714	264.957	210.059	210.976	243.739			171.724	167.005	174.13	183.936	226.03	196.512	176.841	186.022	197.585	217.744	264.449	176.072	187.787	213.854	200.58	233.216	198.714	172.2	192.947	242.317	194.47			239.139	168.64	188.856
533.105	241.003	225.064	266.854	271.505	265.006	290.637	261.365	240.261	236.311	224.397	226.568	194.63	231.708	217.054	254.668	259.378	244.978	269.143	207.173	212.192	241.44			169.182	164.996	184.211	180.563	219.54	192.223	175.19	182.502	202.042	226.615	285.926	174.758	188.758	214.239	199.764	233.093	198.285	170.149	197.718	253.375	198.298			242.562	173.858	191.163
535.651	241.235	226.715	271.982	273.815	259.653	285.705	258.405	245.403	246.973	228.956	227.263	195.211	231.186	218.66	254.379	252.426	243.494	266.334	207.922	212.314	245.021			170.614	170.116	177.351	182.877	225.56	192.503	176.408	188.299	202.046	218.652	273.068	174.295	187.75	215.107	201.688	235.163	195.769	169.834	197.123	253.588	198.543			247.815	170.535	191.081
538.198	243.87	227.878	275.404	275.532	259.733	289.056	260.578	250.896	248.485	229.309	229.274	197.754	233.154	222.585	256.36	258.073	247.362	264.321	206.199	216.647	247.655			173.041	173.96	177.712	187.761	234.894	197.975	181.682	193.149	203.416	220.701	277.719	178.264	190.585	215.137	204.833	238.824	202.068	173.896	198.582	257.257	199.483			250.427	171.856	191.293
540.744	246.161	227.438	274.153	277.624	262.399	293.703	259.791	252.2	243.674	229.408	231.579	198.355	234.986	221.629	257.846	261.821	248.723	263.989	206.306	220.155	247.569			173.889	172.353	183.059	189.116	234.58	202.684	181.897	188.955	205.348	228.313	291.936	182.377	194.341	219.101	209.165	242.888	204.306	176.172	202.931	263.96	201.624			250.861	175.541	193.241
543.291	245.93	224.655	269.101	277.116	263.629	293	261.33	251.405	241.839	228.597	230.614	198.424	235.445	217.96	256.439	257.959	246.709	264.671	205.749	218.277	245.799			173.35	170.104	183.285	187.387	228.553	200.799	180.055	183.627	208.031	231.038	292.884	182.764	194.31	222.166	211.024	245.736	203.334	174.332	204.488	266.492	202.366			254.128	177.593	194.733
545.837	243.872	222.715	267.025	275.461	261.734	287.58	267.313	254.671	247.458	228.372	227.674	199.971	235.518	216.718	254.217	251.377	244.633	264.824	203.41	213.628	246.182			174.166	172.765	177.167	187.605	229.258	196.808	182.376	186.749	210.366	225.685	277.454	181.815	192.122	221.388	210.624	248.078	205.146	172.64	202.104	264.409	201.686			260.666	175.384	194.103
548.384	244.53	228.782	278.099	282.089	259.662	288.136	266.146	266.728	252.881	235.304	231.803	201.775	237.983	219.846	258.522	255.025	246.238	263.26	204.698	217.742	253.343			179.829	179.412	181.277	195.061	245.65	207.159	189.586	196.745	209.096	224.232	281.012	188.93	198.31	223.414	215.453	253.582	211.961	180.312	205.537	270.923	205.088			261.511	170.491	193.316
550.93	252.617	228.652	277.391	284.093	265.489	299.651	263.508	257.611	247.547	233.738	232.98	201.26	239.567	221.639	261.651	268.873	248.37	266.774	205.633	223.085	254.11			180.313	177.506	196.419	192.213	239.033	202.903	186.84	189.871	208.49	238.844	315.127	186.522	198.467	228.401	215.751	254.073	212.062	179.762	215.071	280.197	209.858			258.814	177.11	196.24
553.477	247.061	226.247	269.755	279.788	267.072	290.377	264.579	255.468	241.322	228.911	228.964	201.137	240.153	217.783	257.463	260.559	248.279	266.292	206.113	216.151	250.615			178.046	175.28	184.748	189.124	230.513	197.033	183.346	188.099	210.856	234.463	292.035	184.188	197.269	226.541	211.758	251.428	207.598	175.854	207.858	272.339	206.907			261.854	179.499	199.421
556.024	246.865	229.152	276.497	280.749	264.762	287.539	263.863	257.239	248.105	231.642	231.059	201.902	239.904	217.815	257.712	255.344	245.564	267.766	206.597	215.574	251.494			179.381	177.233	179.144	190.8	233.596	199.198	184.311	191.786	211.28	229.646	281.377	183.744	197.269	225.5	213.901	251.065	206.281	174.996	206.538	270.504	205.821			263.293	176.121	196.966
558.57	249.663	230.279	280.587	282.476	263.899	293.478	262.391	258.868	251.007	233.315	232.047	201.903	239.202	221.003	260.987	261.289	247.192	269.33	209.091	219.336	253.754			180.044	178.981	182.485	191.649	236.783	202.183	185.041	191.959	209.546	231.172	289.276	183.37	197.349	226.806	218.361	253.871	205.975	176.67	209.012	270.461	207.162			261.352	177.061	196.311
561.117	250.252	227.026	276.192	281.376	266.507	298.665	261.634	258.923	244.469	229.467	229.325	200.622	239.144	222.452	261.051	268.653	250.923	269.114	211.375	220.51	253.863			177.957	177.65	186.672	189.6	234.987	202.138	183.603	187.192	207.821	234.604	296.274	182.157	196.32	227.965	219.62	255.385	205.696	177.226	209.883	268.574	207.423			258.112	181.712	199.443
563.663	246.765	223.705	273.648	278.986	269.361	293.349	261.481	258.002	238.796	224.772	227.306	199.182	240.213	218.421	254.747	262.791	247.826	267.506	209.46	215.503	251.371			176.08	175.006	183.375	187.988	232.926	201.23	182.673	184.686	208.083	231.267	283.975	180.871	194.065	225.807	215.62	250.913	206.425	174.072	207.07	266.741	203.94			256.629	180.604	200.978
566.21	243.466	223.924	276.485	280.709	265.257	288.386	259.309	253.927	241.097	228.811	226.979	199.233	238.599	215.45	256.28	258.077	240.464	267.416	207.864	213.978	250.137			180.601	177.868	178.664	190.115	230.781	199.544	185.125	190.655	207.204	226.415	277.764	180.588	191.833	223.716	211.644	249.057	205.387	173.608	203.79	265.525	204.15			254.603	176.289	196.766
568.756	244.432	225.963	271.875	279.386	268.634	291.586	257.686	249.655	236.774	230.005	225.23	197.633	240.068	216.224	254.389	259.969	243.925	269.339	207.526	216.101	251.881			178.273	175.972	182.189	186.814	229.074	196.144	181.787	186.412	204.523	230.27	284.511	180.753	192.993	222.096	215.096	252.139	208.287	172.198	207.039	266.573	204.82			251.484	176.88	193.21
571.303	242.731	225.545	271.508	275.356	268.234	289.252	256.824	251.96	239.41	228.914	223.807	196.939	236.951	214.567	251.824	255.377	241.36	266.977	205.465	215.172	251.045			179.541	175.237	178.629	186.122	229.05	195.213	179.606	185.873	203.906	227.965	277.842	179.932	191.034	220.959	212.799	248.341	207.634	169.977	204.204	262.493	203.663			253.767	177.697	192.872
573.849	242.719	225.193	271.478	272.654	265.335	288.031	257.916	251.146	238.779	227.137	223.752	198.123	236.139	213.649	252.486	253.597	239.875	264.637	203.416	214.819	250.456			178.877	173.801	174.677	186.649	229.852	195.763	178.456	185.202	202.094	224.218	272.849	179.224	189.641	218.726	210.21	245.232	206.23	169.803	203.141	261.386	203.009			252.21	175.6	193.155
576.396	243.256	225.104	269.317	271.215	262.767	287.868	255.428	248.061	235.445	224.124	224.539	197.838	236.199	213.188	254.222	256.531	239.659	263.065	202.587	214.696	249.303			176.81	171.899	174.263	185.058	226.979	195.638	177.731	184.183	200.58	222.27	276.503	178.611	188.627	218.954	208.014	245.082	204.37	170.414	202.464	261.774	202.962			246.76	174.76	194.743
578.942	241.525	223.723	264.564	269.084	262.354	285.405	250.032	246.52	232.292	220.352	224.812	194.943	234.813	212.361	253.027	257.764	238.217	260.904	202.317	213.378	246.251			174.358	169.76	175.707	180.764	219.5	193.292	176.335	181.854	200.266	222.103	280.453	176.846	186.901	220.944	206.288	245.13	201.47	168.927	198.815	258.796	201.531			242.575	177.012	196.367
581.489	237.534	219.649	258.85	265.298	263.202	279.319	254.695	245.791	227.679	219.295	223.505	194.659	235.011	212.283	247.748	247.225	235.448	257.195	200.092	211.254	242.589			169.019	166.354	172.725	178.329	214.802	189.378	173.149	174.444	197.847	220.469	265.224	172.621	185.405	215.12	207.558	240.496	198.172	164.245	194.142	251.604	196.385			243.955	175.262	192.056
584.035	238.758	220.1	260.801	264.449	261.178	280.994	252.703	243.305	234.275	221.036	223.252	197.396	235.442	210.94	246.151	242.538	234.174	256.094	198.473	208.408	242.656			170.115	168.207	171.832	178.3	220.191	189.894	173.071	177.956	198.225	214.033	263.174	174.201	185.367	211.991	203.195	234.826	198.174	165.406	194.039	251.157	195.741			243.827	167.22	187.542
586.582	240.183	220.007	264.368	267.381	261.727	282.854	248.799	243.593	235.625	222.069	222.047	195.479	235.629	211.067	249.465	243.532	236.138	256.208	197.008	208.388	243.922			171.91	168.368	176.147	184.154	223.216	195.026	172.362	179.933	196.787	215.373	271.741	173.515	185.315	211.546	203.04	237.309	198.969	165.863	196.266	252.932	195.904			241.902	167.72	189.038
589.128	239.524	220.057	260.346	266.282	262.394	283.267	250.818	239.514	232.048	220.328	221.52	195.394	234.303	209.376	248.518	243.692	237.938	255.658	196.954	208.655	243.35			169.434	165.66	174.86	181.078	220.468	192.221	171.335	178.334	194.961	216.475	273.345	173.713	184.891	212.448	202.212	236.024	198.455	165.644	197.473	250.24	194.502			240.092	168.95	188.834
591.675	238.593	220.665	262.306	266.221	260.517	279.804	250.829	240.538	239.118	220.358	222.715	197.196	234.543	208.67	247.765	239.989	237.793	255.385	196.795	208.532	242.328			169.711	168.332	172.093	181.186	221.533	189.877	173.91	184.3	196.287	217.926	267.16	174.31	184.074	211.42	201.237	233.247	198.182	166.246	195.358	248.548	194.292			242.194	169.493	187.441
594.221	240.971	223.396	272.59	269.88	260.426	279.493	249.652	246.234	247.234	223.234	225.196	197.54	235.785	211.306	250.568	240.691	238.206	256.848	197.244	211.036	243.825			173.684	173.616	173.885	187.137	227.52	193.211	178.871	192.69	198.082	221.306	267.836	175.969	185.934	211.021	203.444	233.437	201.194	169.958	194.025	252.05	196.392			244.295	170.726	186.769
596.768	247.004	227.335	278.987	273.203	266.855	288.621	253.211	247.167	239.53	225.233	227.018	194.429	235.096	215.643	254.774	252.599	241.885	259.503	199.356	216.886	247.714			175.67	172.184	181.701	189.198	229.449	197.396	179.945	189.979	195.752	227.305	286.321	177.79	190.429	215.072	208.91	237.25	206.088	174.904	197.598	257.207	198.781			240.791	174.755	187.951
599.314	246.524	222.55	265.177	265.01	270.334	290.822	255.32	238.703	241.161	220.441	225.304	194.216	233.085	213.143	251.756	255.608	243.367	257.597	199.125	213.552	244.224			170.873	165.442	187.02	176.856	215.993	186.932	170.32	181.551	194.131	235.437	297.121	170.934	182.922	217.162	205.309	236.354	198.171	167.363	196.778	248.135	196.961			239.186	181.859	190.28
601.861	239.367	223.098	267.095	262.524	263.903	283.541	252.758	241.629	235.915	218.682	222.933	193.936	233.836	212.264	250.719	246.602	238.46	255.285	196.448	209.203	242.561			169.131	166.574	174.888	178.521	218.6	184.047	170.682	181.211	191.494	220.413	271.506	169.779	181.564	210.94	200.28	232.836	195.795	165.719	189.303	242.333	193.674			241.304	172.431	192.548
604.407	240.747	219.766	263.272	260.197	260.864	284.93	250.36	238.048	233.058	216.149	222.693	193.399	233.724	212.708	250.796	247.71	237.427	252.667	195.48	209.966	242.655			166.603	165.532	174.064	175.871	214.023	183.192	166.383	174.559	187.207	217.233	276.979	166.311	176.656	209.332	198.55	230.879	192.117	163.318	191.508	243.02	195.35			233.473	169.426	192.884
606.954	238.134	216.965	255.765	257.099	256.854	281.173	247.025	234.045	226.862	213.773	221.272	191.485	232.24	208.295	246.579	242.762	234.325	250.295	192.949	206.898	239.432			163.604	161.487	168.954	171.082	205.937	179.46	163.629	170.078	186.836	212.783	269.774	162.039	172.715	204.173	193.732	224.526	187.77	160.139	187.023	239.48	191.516			226.255	171.109	191.298
609.5	233.734	216.069	250.957	254.634	253.65	274.23	244.832	229.626	224.272	211.849	219.955	189.992	230.591	204.762	242.331	235.59	230.365	248.878	190.88	203.126	235.578			160.881	157.644	163.878	167.388	199.502	174.272	161.726	169.272	187.364	207.261	256.172	159.917	170.452	198.621	189.556	218.531	184.47	156.674	180.609	234.409	186.836			221.782	169.533	185.747
612.047	232.139	216.677	251.382	253.791	252.485	269.871	245.49	226.53	225.774	211.021	219.698	190.37	229.914	204.979	241.517	232.676	227.863	247.858	190.873	202.415	234.309			159.617	155.729	162.562	166.219	197.874	171.1	159.423	170.647	186.237	204.166	247.727	160.264	169.329	196.109	189.763	216.953	183.148	154.807	178.695	230.963	185.125			219.905	163.058	178.131
614.594	234.075	218.476	254.358	254.334	251.715	270.738	248.767	229.013	222.384	212.117	220.015	192.244	230.642	205.451	242.861	233.909	227.855	246.717	191.852	204.22	235.825			160.774	154.911	161.001	166.915	200.736	172.429	157.952	172.489	185.53	204.277	242.353	160.689	169.653	195.728	192.397	217.943	183.544	156.52	179.886	227.779	183.894			221.079	158.84	174.566
617.14	239.099	225.435	262.816	257.395	251.491	276.328	253.978	232.039	220.932	213.816	224.856	194.544	233.954	212.672	246.947	234.297	234.182	252.588	193.231	208.85	239.217			162.99	158.791	162.156	171.26	205.851	178.199	159.55	174.342	189.408	204.568	246.364	163.429	175.168	197.697	189.03	217.423	186.5	157.975	179.686	226.873	186.289			224.44	158.812	176.006
619.687	239.309	223.558	256.331	254.118	249.569	282.356	250.544	231.507	225.749	213.934	225.584	193.834	231.547	213.426	249.11	240.467	239.277	250.866	195.609	211.13	238.213			160.626	154.393	163.456	165.804	197.835	170.29	157.43	169.575	184.711	205.743	255.054	158.907	169.444	195.707	189.886	216.289	181.372	156.71	180.42	225.923	185.429			219.753	160.246	178.11
622.233	236.459	219.724	249.83	251.587	251.692	278.024	243.513	228.536	224.497	210.537	221.891	192.362	230.026	212.81	244.173	237.482	237.778	249.466	193.179	208.446	233.599			157.317	151.622	160.685	163.958	194.507	170.934	158.138	166.365	182.957	203.405	245.795	157.165	166.551	192.97	186.816	212.077	177.871	154.35	177.741	220.674	184.582			218.876	161.81	180.442
624.78	233.776	216.959	250.299	249.703	250.473	274.127	240.948	224.699	224.857	209.391	219.17	191.271	228.538	213.17	241.058	233.87	235.177	248.772	189.896	205.764	231.123			155.896	150.206	160.056	164.819	195.661	172.458	158.676	167.791	181.295	200.798	244.382	158.105	167.713	190.368	183.845	206.781	176.853	155.301	175.466	218.769	183.323			218.098	160.687	177.107
627.326	232.745	215.595	251.597	247.18	247.163	271.121	241.796	219.59	228.145	209.455	219.503	190.254	226.926	212.085	241.893	231.566	233.146	247.032	187.715	205.371	230.411			155.034	150.597	161.018	165.047	196.284	170.318	156.882	169.811	179.027	198.91	249.954	157.855	168.352	189.309	182.786	205.003	178.076	156.421	173.537	220.711	182.147			217.087	157.938	172.749
629.873	232.338	215.875	248.181	244.064	244.616	268.491	241.902	215.982	231.818	208.138	220.779	189.241	226.185	209.14	243.337	228.932	232.59	243.876	186.618	206.458	228.942			154.754	152.575	160.142	162.171	193.677	166.287	153.35	169.498	177.662	196.969	251.105	154.735	164.974	189.736	182.75	206.902	178.828	154.394	171.182	221.63	181.304			216.387	156.404	173.357
632.419	230.17	219.024	245.549	242.841	241.403	271.726	240.593	220.458	233.177	206.447	218.897	189.602	227.596	209.459	241.645	226.181	235.844	242.072	186.01	206.59	227			158.538	153.856	156.493	157.747	191.456	166.321	151.264	170.184	178.499	194.366	246.198	152.682	160.498	189.23	182.102	205.859	174.896	151.901	169.816	216.786	180.074			214.721	157.291	177.244
634.966	231.083	219.201	249.602	245.055	243.472	271.225	242.334	219.416	225.074	205.902	220.175	192.682	228.345	209.15	245.965	229.669	236.961	242.298	187.544	206.926	231.876			154.902	152.045	155.794	165.586	192.609	166.564	150.951	168.302	174.107	195.414	247.442	154.419	164.386	188.028	186.746	208.97	175.721	152.263	168.83	215.942	180.126			213.463	152.757	174.791
637.512	233.047	218.956	249.678	245.746	243.259	270.865	242.121	216.1	219.694	205.565	221.509	192.013	228.567	210.142	242.391	228.886	232.282	241.47	185.645	207.854	228.595			150.786	147.804	156.847	162.627	186.496	166.697	150.568	165.085	173.038	193.854	243.379	154.841	166.279	185.552	180.08	204.518	172.896	153.56	166.962	209.438	179.575			208.228	156.779	168.15
640.059	233.535	221.084	243.642	241.977	243.455	269.665	243.961	217.488	221.477	205.569	220.912	190.958	226.809	211.321	240.288	227.136	233.585	243.325	185.807	206.761	226.85			150.64	144.6	153.847	156.449	180.12	159.987	149.298	161.143	173.527	194.56	234.862	150.761	161.489	183.638	175.767	198.554	170.463	152.048	162.43	204.23	175.858			204.556	156.583	170.933
642.605	231.269	221.719	242.262	240.522	243.104	265.716	246.367	217.124	225.52	207.502	218.929	190.048	225.64	212.121	241.252	223.567	235.984	244.25	185.565	205.297	227.006			151.12	144.946	149.707	154.146	179.207	157.587	149.222	162.48	172.39	192.885	226.586	150.607	158.48	181.747	175.455	196.305	170.135	150.242	159.914	201.827	173.684			203.464	153.228	171.309
645.152	229.89	221.119	246.779	242.301	242.389	263.82	246.703	215.626	228.114	208.969	217.509	189.455	226.063	212.118	242.248	222.295	236.643	243.575	183.827	204.681	227.965			151.122	147.326	149.891	156.884	185.094	160.593	150.073	168.248	171.244	191.502	226.776	153.359	159.832	179.622	176.709	197.64	171.134	150.01	161.051	202.409	173.942			205.6	150.811	167.848
647.698	232.539	220.484	251.47	243.55	242.689	268.277	243.507	215.122	226.662	207.603	218.416	188.92	226.583	212.035	241.398	226.265	236.763	243.195	182.533	204.962	228.597			151.226	148.67	155.798	160.205	191.938	163.784	150.183	171.326	171.852	194.563	237.823	153.423	161.898	178.109	176.757	198.959	172.095	151.753	163.797	204.875	175.501			207.797	151.536	166.465
650.245	235.465	217.342	251.418	241.085	244.946	274.001	238.261	210.785	218.728	205.603	221.14	187.625	224.35	213.54	242.328	229.908	238.933	244.392	185.313	205.028	228.072			151.028	147.759	159.999	157.566	187.49	164.936	148.523	164.007	170.753	198.303	248.07	150.256	159.519	178.756	175.321	197.038	172.669	154.191	164.262	206.465	178.463			201.588	153.111	169.6
652.791	229.712	215.157	240.621	237.87	241.48	269.865	236.125	205.795	214.535	200.338	216.883	186.913	224.08	205.791	237.056	227.004	234.199	240.784	184.742	200.94	224.591			147.939	143.052	155.599	152.696	174.472	157.701	142.705	158.617	169.386	191.809	243.307	146.772	154.834	175.746	171.576	191.573	165.258	146.095	159.875	201.909	172.886			198.737	158.947	173.855
655.338	225.775	213.903	239.785	236.291	240.325	263.005	235.868	204.302	215.801	200.98	216.154	185.983	224.478	205.215	235.364	221.854	230.582	239.285	182.744	199.227	223.186			146.292	141.878	149.109	151.663	176.244	156.087	144.013	158.589	167.448	185.538	226.883	146.86	154.931	173.117	172.456	188.963	164.598	148.243	158.945	199.11	170.833			200.273	148.822	167.775
657.884	225.906	214.442	242.364	237.176	239.833	262.666	237.69	206.872	222.618	201.637	217.211	185.64	224.036	205.597	234.454	219.137	230.125	240.313	181.18	199.952	223.248			146.167	141.803	148.169	153.334	179.749	155.404	146.347	162.615	166.417	184.181	227.1	147.776	156.176	172.275	171.454	187.44	165.816	150.391	158.097	197.594	171.334			198.859	147.692	164.017
660.431	227.992	215.35	243.942	238.215	239.51	264.949	238.527	208.035	224.093	201.851	219.425	186.164	223.787	207.202	237.503	221.806	233.192	241.608	182.552	201.377	224.723			146.975	142.224	150.338	153.84	180.388	155.268	144.817	163.636	165.728	185.104	233.319	146.716	155.72	172.579	170.791	188.916	166.095	150.53	158.436	196.397	171.509			197.655	147.795	165.247
662.977	228.98	216.009	242.773	238.357	239.636	266.059	236.606	206.045	221.307	200.481	219.784	186.049	224.027	208.106	239.971	225.651	235.826	241.781	185.227	201.526	225.046			147.368	141.774	151.474	151.908	175.905	153.634	141.077	160.43	165.01	186.569	234.277	143.579	152.912	172.539	169.774	190.161	165.112	147.589	157.967	195.809	170.979			195.387	146.742	167.782
665.524	227.56	216.901	240.389	237.522	239.711	264.662	233.959	203.211	220.374	197.844	216.922	184.417	224.508	206.691	237.673	224.283	235.579	241.202	186.144	200.286	222.752			146.611	139.999	149.206	149.107	168.445	149.248	139.256	157.869	163.804	187.043	227.825	140.678	149.308	171.233	167.393	188.251	163.339	143.002	154.423	194.763	170.395			190.986	147.202	166.851
668.071	226.044	218.655	240.974	235.35	237.332	261.289	236.178	202.691	217.717	198.728	215.934	183.89	225.401	206.249	238.741	217.702	237.943	241.429	185.612	200.781	221.873			145.992	139.414	144.974	148.12	166.777	145.992	139.184	161.695	161.099	183.037	220.729	140.881	147.767	169.533	167.767	188.517	160.001	142.892	150.596	188.625	168.511			191.67	146.388	162.63
670.617	226.594	217.868	244.724	237.87	237.12	262.646	231.571	205.169	215.935	199.097	216.658	185.21	223.746	205.541	238.911	217.353	237.406	239.738	184.808	202.419	221.268			145.655	137.996	145.853	152.216	173.513	151.75	141.518	160.806	161.667	181.858	214.665	144.188	151.942	168.142	167.971	187.894	159.643	142.764	150.679	187.327	167.208			190.588	144.15	159.578
673.164	230.47	217.192	243.712	236.979	240.267	263.095	233.012	205.128	211.228	196.071	216.835	182.575	225.42	205.476	236.628	220.469	235.474	241.047	185.593	202.237	223.453			143.285	137.698	148.962	150.39	170.639	151.069	138.676	155.753	160.686	181.532	221.714	142.013	148.815	167.985	164.693	183.637	162.739	141.764	151.506	187.229	168.08			186.308	144.897	159.828
675.71	230.32	215.095	235.618	234.325	241.784	262.814	231.386	200.676	209.391	194.545	215.291	182.328	224.916	203.388	235.626	221.442	232.307	241.617	183.77	200.109	222.514			141.18	134.978	146.678	145.938	163.169	146.1	136.687	151.776	161.177	181.482	219.201	138.49	145.394	167.684	162.689	181.05	158.961	140.483	150.431	186.445	166.917			183.747	146.386	162.058
678.257	227.554	213.31	232.664	233.144	240.659	259.357	230.552	198.44	211.607	195.334	213.25	182.781	224.09	201.722	235.15	217.224	230.29	241.686	182.721	197.433	220.255			141.204	133.792	142.167	143.412	159.68	141.699	136.009	153.071	161.894	178.44	211.028	136.945	143.513	164.352	160.819	179.805	155.221	138.996	147.2	183.341	164.991			183.396	144.339	159.766
680.803	225.884	213.407	238.258	233.982	238.331	257.112	231.857	200.33	214.098	196.401	213.472	183.692	223.457	201.807	234.501	214.171	229.259	242.337	183.834	196.882	219.718			141.926	135.131	140.575	144.4	162.732	142.216	136.241	156.246	160.143	175.029	206.173	137.195	143.607	160.253	159.52	178.112	153.996	138.757	144.501	180.852	164.278			184.922	140.192	154.68
683.35	227.326	214.803	245.193	235.453	237.268	260.762	232.614	202.318	213.239	196.804	216.574	185.106	223.05	203.143	234.405	218.935	228.728	243.177	185.728	199.077	221.164			141.439	136.317	143.379	146.849	167.976	147.097	137.046	156.836	156.759	174.906	210.008	137.497	145.129	159.656	159.704	176.441	153.505	140.467	145.313	181.231	165.427			185.972	138.535	153.247
685.896	229.528	214.306	243.523	236.74	239.07	265.155	229.906	198.729	211.859	199.754	217.87	183.916	225.254	204.589	236.488	225.793	231.17	241.519	186.741	199.632	220.256			141.282	134.18	145.191	146.667	167.98	148.363	137.837	158.085	158.97	175.026	219.753	137.857	146.334	162.345	159.443	179.027	154.181	141.557	149.004	179.659	166.807			181.429	141.103	157.127
688.443	228.599	214.212	238.626	236.832	241.015	264.704	228.851	193.501	216.803	195.527	216.922	181.941	225.998	204.145	234.298	226.054	230.754	244.575	188.129	197.953	218.851			139.67	130.538	142.701	143.668	161.523	143.231	135.115	152.579	156.719	177.484	221.922	136.438	144.443	160.156	156.344	174.086	151.134	142.723	146.896	180.085	164.72			179.736	147.135	158.525
690.989	226.232	213.246	238.671	233.43	239.816	259.717	229.999	191.954	216.681	195.973	217.701	182.376	224.987	202.71	231.691	220.151	227.405	242.666	186.211	197.857	219.233			139.783	133.093	140.583	141.652	159.564	141.141	134.134	153.374	155.26	174.754	212.255	136.042	142.774	157.456	155.608	172.039	148.937	140.831	141.23	176.996	162.405			182.827	142.077	157.39
693.536	228.22	213.368	243.79	234.279	237.556	260.185	231.009	191.921	218.447	196.908	219.609	183.662	225.899	202.345	230.894	221.427	226.402	241.715	185.494	199.145	219.629			140.208	133.963	141.376	141.488	160.971	139.652	135.279	155.667	154.451	171.834	209.758	135.947	143.115	155.532	155.134	171.865	148.56	141.445	141.125	174.059	162.554			182.029	137.855	154.682
696.082	228.8	213.27	242.167	233.464	236.51	263.711	229.76	191.34	217.735	196.426	219.31	183.907	225.816	202.771	230.915	226.247	227.761	242.095	186.227	200.12	218.31			138.862	131.512	142.804	140.211	161.208	138.633	135.362	154.989	152.855	171.444	214.707	134.867	141.566	154.789	155.139	171.059	147.438	139.755	140.498	172.345	162.096			175.845	138.131	155.951
698.629	227.279	213.339	238.574	232.375	235.964	264.467	228.813	191.519	214.147	194.106	217.794	183.175	224.685	202.355	230.107	227.162	227.569	243.428	185.424	200.926	217.005			137.205	128.707	142.378	138.641	158.918	137.74	133.756	153.731	151.451	171.486	216.346	133.448	139.371	153.292	153.177	168.418	145.964	137.482	137.882	169.788	160.302			170.853	138.947	156.915
701.175	227.227	214.49	240.248	233.856	235.383	261.922	229.909	193.412	210.934	192.094	217.434	182.293	224.174	200.965	228.879	222.646	224.733	244.678	183.442	203.607	217.662			136.969	128.43	140.035	138.195	155.567	136.758	131.784	153.835	151.101	169.235	209.893	132.504	138.925	150.313	150.014	165.376	145.271	138.118	136.122	166.236	158.698			171.103	136.73	153.115
703.722	230.355	215.909	238.297	233.209	237.349	264.275	229.009	194.183	210.262	194.425	217.554	181.231	224.257	201.645	230.496	221.289	225.568	243.96	187.563	210.487	218.595			136.346	128.945	138.738	136.445	152.877	136.09	130.343	149.948	149.948	166.375	208.008	131.168	137.841	149.279	153.274	165.28	143.929	138.829	136.591	166.812	158.414			169.464	135.595	151.379
706.268	229.27	216.672	236.517	235.88	237.74	261.424	232.044	198.201	209.132	194.954	219.286	182.08	224.665	202.636	230.934	219.952	227.001	243.151	188.718	219.624	218.737			136.14	126.621	137.282	133.897	151.015	133.727	129.752	150.3	151.351	166.566	202.899	132.391	137.011	149.265	150.904	164.743	143.38	139.044	135.489	165.851	156.942			170.373	135.942	150.969
708.815	230.93	218.645	240.289	236.844	237.935	262.412	235.023	200.31	208.022	194.515	219.46	182.767	224.903	203.095	229.758	219.57	225.875	246.581	186.415	249.677	217.993			135.907	127.787	136.873	135.708	150.23	134.405	128.537	150.65	150.59	165.876	200.69	132.986	136.572	147.851	149.197	165.526	145.853	138.304	135.592	164.426	157.426			170.42	135.13	149.815
711.361	232.182	220.058	240.951	238.023	240.729	264.957	234.474	201.38	209.671	194.807	219.547	182.553	226.823	205.199	231.259	220.066	228.751	248.258	187.913	283.81	220.187			135.865	126.18	136.042	134.598	148.215	132.167	128.218	150.939	151.177	166.186	198.666	133.202	136.775	147.49	149.666	164.54	146.606	139.124	134.444	165.88	157.722			170.301	134.838	149.428
713.908	230.87	220.274	240.794	238.436	241.509	266.579	234.222	201.51	210.987	195.052	220.671	183.36	226.639	207.175	232.843	220.155	231.344	249.194	190.3	296.251	221.006			136.138	126.565	135.37	135.919	147.475	131.879	128.652	152.108	151.753	166.964	195.931	132.609	136.514	148.004	148.991	164.178	145.266	138.922	133.519	165.23	157.02			169.917	135.833	150.78
716.454	231.087	220.75	241.789	239.129	241.612	267.43	236.579	200.602	211.091	196.008	222.826	183.765	225.864	208.328	234.504	221.77	234.625	251.588	192.325	281.133	220.61			136.767	127.454	135.469	138.734	149.944	135.597	129.596	152.694	152.19	167.854	196.385	133.127	137.859	147.973	148.021	164.436	143.901	139.65	134.256	161.498	157.457			170.184	136.769	151.517
719.001	234.399	221.461	242.693	239.942	243.245	269.001	238.783	197.461	211.764	197.435	223.905	183.369	226.751	209.283	236.329	225.683	239.767	254.293	193.163	250.81	221.175			137.302	126.879	137.14	138.943	152.935	138.65	130.323	151.971	152.293	169.386	201.624	134.275	140.2	147.261	147.997	164.641	144.125	142.008	135.773	159.596	158.82			171.676	137.124	151.416
721.547	234.853	219.798	241.008	238.381	244.069	271.608	235.453	191.221	215.387	197.099	221.606	185.024	227.832	211.088	236.762	228.676	243.738	252.798	191.523	224.493	222.664			136.884	127.315	140.212	135.997	151.049	133.876	130.085	152.206	150.919	171.717	206.068	132.107	138.887	147.757	147.499	165.312	145.271	142.006	135.01	164.828	156.948			173.66	138.136	154.088
724.094	232.371	219.2	245.184	238.923	240.527	270.752	235.355	190.632	220.061	197.592	223.694	185.258	228.226	213.712	239.558	229.658	247.969	251.738	192.756	212.149	221.638			135.836	125.677	136.811	138.65	154.687	134.204	132.093	155.093	150.174	168.044	203.229	133.031	142.682	148.255	148.71	165.159	146.492	142.507	132.709	161.531	156.732			175.832	135.409	153.11
726.641	233.736	219.623	245.409	238.264	240.07	268.585	233.317	190.231	223.873	197.128	221.348	182.948	227.904	213.599	241.33	229.786	248.642	252.034	192.841	209.938	220.03			134.702	126.909	139.117	138.79	151.883	133.611	130.182	150.605	148.755	166.705	209.636	130.142	139.828	147.546	148.148	164.456	144.424	140.341	132.388	165.57	158.145			171.774	134.008	152.155
729.187	233.104	220.381	245.498	238.199	240.129	266.911	234.721	189.535	220.647	196.654	221.353	183.049	227.802	214.337	239.364	231.71	250.007	251.634	193.739	206.19	220.293			135.271	126.292	139.22	135.393	149.605	130.796	129.393	149.595	148.824	168.749	205.215	129.058	136.152	148.846	149.054	166.811	143.04	138.626	132.969	163.057	157.254			170.474	132.519	154.727
731.734	232.95	220.296	246.895	236.841	239.969	267.498	235.273	189.452	218.058	197.621	220.761	185.087	229.472	212.122	238.147	230.575	248.114	250.401	192.55	205.082	220.787			135.362	126.155	136.878	135.853	150.439	130.732	129.39	151.947	148.488	169.565	200.081	129.544	135.762	147.25	148.037	165.887	141.194	137.37	131.777	158.631	156.444			172.647	133.065	154.182
734.28	235.024	221.728	253.226	240.224	240.181	270.402	236.34	193.452	217.684	200.121	222.262	186.729	230.25	210.798	239.643	229.833	245.375	250.51	192.149	205.454	222.812			136.754	128.236	137.056	140.905	157.363	136.565	131.749	155.256	148.278	168.203	202.42	132.218	140.88	144.925	147.739	162.919	142.751	140.158	132.588	157.831	157.556			174.738	134.266	151.387
736.827	239.015	224.57	256.219	245.49	242.658	275.302	237.835	196.386	219.134	201.2	225.055	186.333	229.747	212.401	241.734	232.971	246.66	252.122	193.845	206.309	224.469			137.909	129.076	140.877	142.812	159.89	140.557	132.637	154.132	148.441	169.084	214.337	134.014	144.082	145.41	149.328	161.978	145.875	142.942	136.044	161.238	159.518			172.869	136.472	152.155
739.373	242.786	225.553	245.717	243.037	247.249	278.97	237.376	190.566	221.644	198.193	224.367	184.968	230.774	213.261	240.84	236.578	251.542	252.995	194.74	207.97	221.927			135.368	124.439	142.301	134.939	146.143	132.562	126.961	147.046	148.625	174.092	224.333	131.153	136.536	147.704	149.907	164.141	143.741	137.882	136.802	163.434	159.374			167.819	139.836	158.717
741.92	243.997	225.45	249.851	244.857	244.989	268.371	239.471	193.651	220.016	197.797	224.197	187.339	232.002	210.177	238.687	228.834	244.943	253.656	193.218	205.384	221.067			137.197	124.115	133.668	132.736	146.972	129.238	127.486	151.984	151.402	164.945	195.498	131.991	135.526	143.227	148.449	163.432	141.471	137.105	131.569	157.57	157.145			170.168	132.784	157.104
744.466	247.437	231.221	256.293	249.244	246.34	269.353	238.707	198.103	216.807	200.842	226.646	187.797	233.519	215.41	240.228	227.246	244.909	254.703	193.379	207.844	223.658			138.068	126.034	134.999	136.404	148.918	131.047	128.806	153.893	153.031	164.96	196.257	132.151	136.752	144.626	147.035	161.909	142.408	136.942	132.071	159.984	157.771			171.788	131.931	148.381
747.013	253.35	231.47	257.636	253.3	247.842	274.405	240.379	199.997	213.863	201.043	228.595	191.263	236.06	217.494	244.013	231.953	246.615	256.508	195.223	211.911	224.585			138.126	126.711	135.672	136.574	150.178	133.381	128.859	151.226	153.929	168.886	198.83	132.032	137.681	147.758	147.752	163.891	144.155	136.75	135.975	163.559	160.558			172.877	134.426	150.373
749.559	255.162	231.813	257.156	255.58	249.284	273.754	240.932	198.249	214.383	201.812	229.961	192.981	237.373	218.923	243.288	234.426	246.24	258.217	197.183	212.919	224.317			138.319	125.941	135.554	136.457	148.609	133.6	128.541	151.084	153.765	167.322	198.898	131.819	139.022	147.372	147.664	163.353	143.204	137.365	135.234	163.79	161.722			171.716	136.845	152.348
752.106	257.839	233.533	258.42	257.681	248.932	272.777	243.723	198.901	217.835	203.69	231.624	194.403	239.026	222.006	242.457	235.726	245.285	258.979	199.233	213.612	225.548			139.714	125.961	134.97	136.236	148.827	133.628	129.954	152.573	154.114	167.085	195.717	132.31	139.016	146.358	148.325	162.92	142.392	137.327	133.962	164.192	160.949			174.624	137.621	152.344
754.652	259.814	235.698	262.078	258.917	250.037	276.056	245.861	200.992	222.361	206.158	233.649	194.636	240.813	226.133	244.33	238.244	247.28	259.444	202.583	216.422	228.64			141.701	127.083	135.985	136.561	151.115	135.074	132.442	152.862	154.613	169.084	194.647	133.741	138.722	147.952	151.082	166.25	142.827	138.051	135.351	165.433	161.112			177.702	137.007	152.638
757.199	256.488	236.052	264.861	258.588	254.948	282.07	244.534	200.128	225.051	207.843	234.688	192.94	241.117	228.352	246.899	243.161	251.726	260.955	206.768	219.484	230.995			142.589	128.013	139.278	138.001	152.503	137.424	133.506	151.649	154.701	169.506	200.232	135.326	140.134	150.774	154.199	171.081	143.409	140.161	137.469	165.919	163.138			174.833	137.116	154.939
759.745	252.12	232.473	262.281	259.974	256.707	285.132	247.42	198.824	222.773	206.747	232.91	193.998	240.157	226.493	246.554	249.881	250.638	263.669	207.558	217.339	229.775			141.695	128.417	140.755	139.332	153.45	138.753	132.411	152.721	156.496	170.401	207.035	135.718	141.735	148.766	152.986	167.862	144.038	138.797	136.004	167.155	161.947			173.907	140.304	156.873
762.292	251.111	232.271	266.314	259.519	255.038	282.053	242.636	198.778	224.229	205.997	232.053	193.387	240.85	226.64	246.721	245.812	247.904	265.874	207.536	216.202	231.195			142.759	129.027	139.797	142.307	157.732	140.571	133.956	154.575	155.745	167.962	205.133	136.381	142.035	149.858	150.806	168.07	145.001	142.215	138.278	169.243	164.434			176.565	136.796	156.236
764.838	247.878	232.213	265.06	262.461	257.057	282.432	243.288	198.707	223.95	205.841	231.009	191.28	240.334	223.341	246.136	249.166	250.274	268.515	206.321	216.567	231.171			142.8	129.923	143.232	140.734	157.665	140.112	136.345	154.324	156.523	171.911	206.368	136.597	143.549	150.996	153.591	170.432	147.895	142.737	138.902	169.023	166.406			176.191	138.248	157.51
767.385	246.604	234.974	266.838	264.34	257.83	283.962	244.378	196.774	230.797	208.238	230.339	192.215	238.688	223.015	246.525	249.026	250.266	265.447	205.562	214.765	233.173			144.117	131.75	143.705	143.029	159.079	141.052	136.46	157.498	156.205	173.905	208.54	136.26	143.088	152.864	154.318	171.564	147.85	142.449	138.475	169.399	165.437			180.42	138.658	157.901
769.931	246.7	236.945	270.022	264.761	259.647	285.927	241.894	196.364	233.747	209.831	231.106	192.397	238.956	224.585	248.713	251.044	252.559	264.916	207.165	215.166	233.655			146.24	134.275	144.46	146.256	162.484	142.119	136.855	160.79	156.663	175.071	210.571	136.978	144.382	154.491	155.891	173.518	149.524	143.495	140.879	172.042	166.515			183.963	138.625	158.235
772.478	246.265	235.448	268.259	263.181	261.39	286.626	238.939	197.122	233.19	209.29	231.539	190.983	240.066	224.407	251.258	254.472	257.272	266.861	208.966	216.409	233.274			146.708	134.5	146.875	147.149	160.976	140.679	136.754	160.218	157.599	177.09	216.846	136.559	144.463	155.265	158.063	176.327	151.952	143.438	141.807	174.446	167.581			184.34	140.282	160.371
775.024	244.81	233.579	264.15	261.899	261.886	285.243	239.44	197.334	231.481	207.721	230.761	189.778	240.451	222.49	254.06	255.285	262.696	268.015	209.167	216.625	233.744			146.029	132.976	148.48	146.259	156.383	138.345	136.775	157.956	158.226	178.697	221.719	135.626	142.994	154.944	158.175	177.079	153.424	142.565	140.058	173.451	167.056			183.926	143.324	162.823
777.571	243.874	236.746	267.093	263.785	262.371	283.114	242.267	196.557	227.53	207.205	230.498	190.226	240.701	222.951	258.687	252.768	268.465	268.06	208.511	217.358	234.769			147.333	133.785	146.558	146.636	158.937	139.315	138.87	159.543	158.68	178.03	213.732	137.823	144.578	153.702	155.634	173.973	155.019	144.873	140.979	170.117	167.689			185.69	144.551	161.206
780.118	244.292	237.771	265.097	260.955	263.757	282.814	240.596	195.297	228.68	208.447	231.493	189.715	241.44	224.969	262.293	253.812	274.075	269.188	206.358	219.971	235.227			146.92	132.857	147.114	145.906	157.185	137.436	135.724	157.298	158.727	182.278	214.058	137.18	144.237	152.752	157.96	175.536	156.493	146.09	141.388	173.792	168.466			183.508	142.933	156.591
782.664	244.131	238.74	268.676	264.914	261.899	281.77	241.123	199.41	232.902	206.878	231.771	192.039	241.385	224.858	261.744	255.534	277.544	266.751	208.499	220.316	235.761			148.587	134.61	146.505	152.897	167.039	144.146	139.429	163.808	158.954	178.364	210.969	141.491	149.435	155.153	158.254	175.697	156.061	148.627	139.943	172.301	166.528			190.01	144.639	158.926
785.211	250.984	238.383	267.882	262.286	263.669	286.275	241.908	197.042	229.953	208.037	235.279	190.066	242.136	227.082	266.061	258.494	283.007	270.595	210.126	224.626	238.327			150.23	135.277	153.741	150.581	160.972	143.15	136.476	157.665	158.775	185.122	223.92	139.105	146.035	159.89	162.533	180.348	159.661	149.732	146.869	179.455	169.432			185.78	145.671	160.419
787.757	250.087	238.781	266.489	261.019	263.757	285.014	242.513	197.995	227.853	208.224	235.088	192.326	241.519	226.698	263.234	259.85	281.582	269.986	210.559	223.745	237.887			148.719	134.601	150.245	149.809	157.702	140.065	136.452	158.265	159.017	183.261	219.588	139.856	145.218	160.249	161.799	180.939	159.504	147.526	144.343	176.833	168.16			186.527	148.722	165.66
790.304	247.781	238.958	264.773	260.206	262.815	282.752	241.208	197.975	227.128	208.181	234.066	192.807	242.512	226.469	262.204	262.54	277.748	269.431	210.563	221.865	237.365			148.638	133.638	147.279	150.487	156.993	140.374	136.393	157.784	158.377	181.978	212.107	139.627	146.263	159.166	161.91	180.446	156.891	148.741	142.877	172.968	168.226			185.598	147.542	164.754
792.85	247.435	238.654	263.658	258.609	261.851	282.203	240.627	197.051	228.529	207.99	234.368	191.442	243.919	225.439	262.874	266.825	274.414	269.798	209.566	220.888	239.016			149.525	132.307	147.12	149.148	155.265	141.277	135.043	155.311	158.361	182.409	211.223	138.173	145.787	159.021	163.481	179.468	154.322	150.661	143.671	172.477	169.685			181.738	145.242	161.956
795.397	247.627	238.689	265.318	258.076	261.353	281.378	243.359	198.213	230.363	207.262	234.884	192.146	244.032	222.693	260.834	269.338	271.774	269.381	208.484	219.998	241.358			149.003	131.183	145.5	146.68	153.83	139.99	134.974	155.735	159.724	180.46	211.698	138.709	144.091	159.448	163.525	177.647	153.059	149.864	141.939	172.608	169.025			179.799	145.887	163.677
797.943	249.037	239.442	270.818	262.07	262.323	279.068	246.159	199.752	226.617	206.978	233.913	193.61	245.806	223.164	260.987	267.907	270.683	270.815	211.422	220.245	241.031			149.614	132.762	146.68	149.495	158.047	142.24	137.863	156.846	159.044	181.319	206.734	140.677	145.905	159.31	163.765	178.856	153.268	153.749	142.149	172.148	168.08			180.805	142.814	160.482
800.49	252.019	238.688	273.22	266.428	265.748	281.369	246.519	201.275	226.149	207.776	235.876	194.476	244.25	224.137	260.839	273.702	266.777	273.125	213.665	219.49	241.603			150.59	133.329	149.575	147.703	157.962	142.66	137.168	157.694	160.688	185.356	211.562	140.721	147.242	158.488	163.654	182.697	153.226	154.583	142.315	174.521	168.995			183.033	142.509	159.527
803.036	253.579	243.637	282.619	268.847	270.068	287.646	250.451	202.311	231.138	211.596	239.705	194.565	245.378	224.936	260.32	285.135	266.504	277.292	214.266	221.217	246.196			151.837	134.139	149.653	147.1	155.31	139.764	138.012	161.265	161.628	186.371	213.934	138.859	146.72	158.285	164.019	185.952	152.293	157.641	142.942	176.639	170.284			182.198	146.067	161.877
805.583	257.8	244.212	287.853	274.579	272.595	291.672	251.132	203.701	233.872	213.886	241.4	196.231	247.443	227.693	261.41	307.939	266.024	281.749	218.142	223.389	252.984			156.308	136.683	151.337	148.054	156.267	139.783	139.223	164.082	161.302	188.152	214.413	138.965	147.635	158.154	166.401	188.636	154.449	161.717	144.152	174.124	170.811			180.982	147.027	162.672
808.129	262.825	247.194	296.115	281.373	276.81	297.775	253.324	207.443	235.562	215.476	244.172	198.153	250.3	232.076	266.821	337.323	267.517	288.675	227.053	226.768	259.055			160.788	136.78	154.065	150.644	160.932	142.057	141.538	167.281	162.025	190.413	214.441	140.499	151.099	159.239	169.023	192.25	155.701	168.044	146.886	172.734	172.415			181.06	147.528	163.405
810.676	267.631	252.963	307.57	288.069	282.694	303.681	256.095	213.231	237.921	217.692	247.794	199.548	252.557	235.537	271.95	365.255	269.316	297.574	235.835	230.466	265.811			167.057	137.397	157.021	153.511	164.475	144.354	144.892	171.958	162.845	194.313	218.095	142.379	155.799	160.703	170.306	195.023	157.541	177.612	150.494	174.841	173.836			182.013	148.238	164.243
813.222	271.3	258.752	315.903	291.242	287.358	307.861	259.151	217.294	239.718	219.522	250.772	200.713	253.724	237.882	274.388	385.847	271.427	305.512	241.354	233.207	271.795			172.538	138.762	159.891	154.923	163.413	145.518	145.641	174.411	163.983	199.375	223.583	143.983	157.965	161.237	171.218	197.057	159.462	187.485	152.233	178.067	174.646			182.519	150.368	166.114
815.769	271.98	262.46	317.208	288.976	287.825	309.886	263.54	218.12	239.602	219.977	252.415	202.562	253.538	240.994	275.586	396.41	273.985	309.581	243.678	233.786	272.941			172.72	137.98	160.974	154.931	159.79	145.726	142.628	173.032	165.974	202.071	223.684	145.015	156.461	160.568	173.226	199.724	158.665	193.333	150.403	177.822	175.469			181.585	152.914	169.299
818.315	268.105	264.349	318.506	287.148	284.575	306.372	267.68	222.592	241.167	222.221	253.412	205.442	250.494	244.86	275.859	396.141	272.593	310.292	241.613	231.582	269.491			171.397	136.306	156.34	156.43	160.304	144.959	144.678	177.804	165.655	198.549	215.218	144.95	157.951	159.926	174.389	201.247	156.105	195.48	148.261	172.521	175.371			179.946	149.391	170.195
820.862	274.483	264.789	313.363	281.05	285.213	307.552	273.911	221.68	241.603	222.464	253.85	206.669	253.195	247.657	278.356	394.319	278.037	313.972	241.573	235.347	271.456			171.144	134.927	159.069	155.2	159.826	142.489	142.559	176.745	164.442	202.122	216.208	145.412	158.461	159.1	175.557	202.869	156.233	195.002	146.499	172.42	175.49			185.701	150.362	167.219
823.408	275.83	268.225	318.869	281.811	280.955	309.31	276.173	222.59	247.267	224.997	256.78	208.518	252.407	254.369	285.248	391.889	279.808	310.546	240.619	239.128	271.241			173.589	138.244	157.071	158.397	167.933	146.873	143.943	183.072	164.985	200.963	217.179	146.862	160.607	159.131	176.666	199.446	158.702	195.133	147.912	169.084	177.443			187.341	147.571	166.487
825.955	281.361	272.256	317.382	277.652	279.773	313.867	275.506	223.871	246.455	226.514	260.666	207.962	249.945	258.108	291.529	390.647	285.876	307.873	240.081	245.499	270.116			176.095	137.194	159.446	157.798	165.89	147.444	142.377	183.901	165.714	203.579	226.79	148.335	160.748	159.693	179.356	196.481	161.464	193.413	149.781	171.395	177.681			185.032	149.748	166.465
828.501	284.186	270.827	313.206	276.519	278.769	313.027	276.41	226.15	241.118	223.401	260.382	206.69	249.289	256.92	291.742	391.901	287.451	305.711	240.531	245.245	267.625			174.824	134.859	160.016	157.946	161.308	144.791	140.318	182.537	164.974	206.669	228.07	147.394	158.597	159.132	177.857	193.773	160.619	191.255	148.358	169.982	175.236			181.758	153.306	169.58
831.048	284.728	267.953	312.025	277.312	279.85	311.497	277.183	229.082	239.164	220.885	259.039	206.082	249.833	254.141	290.037	400.976	285.27	303.599	240.767	242.393	265.186			172.177	134.237	158.501	157.595	158.783	141.934	139.533	180.256	163.997	208.545	222.033	144.736	156.74	157.89	173.505	191.527	158.586	189.359	146.32	167.865	173.01			180.836	153.447	170.554
833.595	287.488	267.225	316.961	279.987	281.773	312.919	276.882	231.446	242.613	221.392	259.368	206.768	250.218	253.203	291.787	419.945	283.657	303.214	242.32	241.089	266.196			171.996	135.254	157.049	155.843	159.122	141.599	140.141	178.251	163.647	208.775	217.013	143.197	156.344	157.064	170.34	189.68	158.472	189.842	146.19	167.37	172.676			181.767	151.325	168.365
836.141	293.299	268.342	328.067	287.311	281.328	314.981	276.56	232.541	245.591	221.833	260.644	208.149	250.925	253.886	297.025	440.738	284.457	306.363	247.519	240.2	271.782			175.905	136.043	156.548	154.667	160.772	143.224	141.324	178.315	163.03	208.67	217.685	144.224	156.52	156.918	169.731	188.225	159.75	194.727	146.966	166.27	173.482			181.365	151.562	167.05
838.688	294.422	273.247	342.708	294.41	284.323	318.641	273.928	234.046	244.003	222.523	263.674	208.099	253.64	252.543	300.572	445.693	286.466	310.601	252.303	241.001	275.294			183.094	136.468	156.765	154.29	160.09	141.337	142.452	179.745	161.378	212.788	223.141	144.449	157.6	156.516	168.91	188.58	158.966	200.758	146.828	167.956	175.553			179.898	152.157	164.037
841.234	291.41	271.821	347.431	300.522	289.164	319.546	279.358	240.146	245.445	222.383	262.017	209.53	255.101	249.198	297.697	443.307	283.764	316.365	257.974	239.128	275.577			186.551	133.228	155.979	154.218	156.923	140.486	143.303	180.196	160.957	215.073	219.37	143.879	157.422	154.534	170.902	187.061	156.979	201.267	145.156	165.505	174.643			182.293	150.024	166.229
843.781	294.28	277.844	357.879	310.401	293.373	321.309	286.731	242.695	249.122	227.954	265.633	211.198	259.374	250.033	296.503	454.102	282.154	323.722	265.171	238.889	282.642			190.041	137.869	152.984	156.296	165.165	145.989	146.969	186.264	162.126	215.59	215.983	145.494	160.246	151.828	168.615	190.001	159.965	206.737	149.845	167.942	178.309			184.882	149.304	163.291
846.327	299.511	283.566	370.142	320.3	300.582	332.102	289.589	248.934	253.683	232.453	272.355	212.14	261.564	255.12	298.167	474.206	288.293	334.161	273.595	241.959	293.045			193.888	137.331	157.146	157.704	169.4	149.019	148.695	188.742	165.077	219.055	226.643	148.163	163.679	154.013	173.587	197.119	160.647	213.006	154.861	170.669	181.375			184.665	150.732	167.705
848.874	302.62	287.512	380.641	327.771	305.817	339.751	291.589	255.117	254.011	235.645	275.261	212.964	263.017	261.636	300.044	493.385	293.307	345.141	280.274	244.854	300.947			195.489	137.557	160.954	159.653	171.978	150.204	151.271	191.586	167.314	222.922	232.6	150.546	166.408	156.19	176.602	201.444	158.591	222.433	157.36	173.794	184.06			186.251	153.342	172.428
851.42	303.202	289.029	384.287	331.302	309.187	344.533	290.481	256.476	256.722	237.687	275.612	213.027	264.175	265.15	301.829	501.593	296.759	354.242	286.547	247.727	304.428			195.91	139.164	162.952	160.89	171.436	151.119	152.883	194.465	168.235	225.658	234.912	150.549	166.38	156.84	177.975	204.323	157.706	227.376	156.912	176.252	185.942			187.37	153.098	175.792
853.967	301.331	287.248	375.796	329.44	310.587	347.218	285.412	251.406	260.683	237.683	273.703	211.022	264.746	264.02	300.072	495.078	298.407	359.266	290.068	249.139	303.071			193.729	139.548	164.203	158.771	166.433	148.909	150.884	194.166	167.548	225.205	236.19	147.796	162.534	156.75	178.803	205.47	157.666	222.069	154.832	177.032	186.524			185.025	150.205	178.125
856.513	296.336	282.68	359.147	322.756	309.009	344.445	280.894	243.298	257.622	235.195	268.486	207.686	264.426	261.046	293.533	477.676	296.255	359.241	287.176	247.431	297.869			187.256	138.493	163.664	154.148	160.575	142.14	146.76	190.86	165.293	219.876	230.789	144.259	156.962	156.607	177.639	202.435	155.297	212.111	152.705	176.095	185.749			181.812	148.547	178.437
859.06	289.463	279.134	356.13	316.876	308.198	338.903	281.475	239.08	254.238	232.83	266.882	207.697	262.904	260.393	294.606	457.08	294.397	356.044	284.342	248.105	293.461			183.848	140.073	159.131	154.899	161.093	141.967	146.649	191.918	163.908	212.406	218.328	142.244	155.117	156.135	177.758	201.176	154.724	211.046	150.928	173.859	183.603			184.693	147.143	176.252
861.606	282.818	272.882	357.18	311.443	306.704	336.503	278.33	237.578	246.085	230.078	263.37	205.688	259.833	256.911	288.361	443.396	287.212	349.096	276.202	245.509	286.197			180.08	138.751	159.23	153.932	161.558	142.378	145.693	189.147	164.374	207.246	220.56	142.234	154.962	152.663	174.211	198.585	155.106	208.059	151.255	172.75	182.191			179.743	146.448	170.725
864.153	280.043	273.541	352.693	310.65	306.321	332.903	276.005	232.317	240.615	226.475	259.588	205.127	257.988	250.811	283.268	422.461	283.372	343.956	270.061	239.6	279.39			176.191	138.408	155.247	153.553	162.064	144.537	143.843	185.733	162.474	205.635	221.215	140.78	154.687	150.262	167.921	197.655	153.98	199.265	146.412	169.601	179.32			177.986	148.201	170.579
866.699	277.501	269.745	347.15	309.479	306.778	331.889	273.978	225.54	241.685	226.285	259.11	206.175	257.941	247.026	281.566	421.216	281.781	340.923	265.325	237.457	277.076			173.611	136.92	154.024	152.031	159.9	143.118	143.889	181.479	161.543	205.772	222.883	139.72	153.563	151.196	166.928	201.096	152.578	191.994	144.855	168.909	177.89			176.948	148.303	168.709
869.246	277.049	268.184	345.165	308.895	306.471	329.066	274.933	224.098	245.718	226.843	259.814	206.478	257.936	246.15	281.288	427.593	281.194	338.15	265.665	236.086	278.943			174.361	137.765	154.988	151.526	161.723	141.878	145.293	182.712	161.486	207.251	222.511	141.137	154.787	150.949	166.483	201.618	152.005	189.359	145.622	170.73	177.719			176.129	147.461	168.726
871.792	279.371	269.585	345.828	309.365	307.038	329.305	275.941	227.204	247.325	228.501	260.872	206.721	259.397	248.637	281.261	439.103	282.791	338.436	269.024	235.278	282.798			176.403	136.927	157.04	151.865	162.956	142.271	146.574	184.289	161.458	209.104	224.527	143.506	155.939	151.132	168.655	201.044	152.605	190.95	146.591	171.652	177.693			177.141	147.093	169.689
874.339	281.768	270.455	344.412	309.059	305.91	330.267	275.325	229.82	245.484	229.943	262.439	207.748	260.255	252.403	281.279	450.013	284.831	340.771	272.418	235.828	286.036			177.229	135.167	158.087	153.262	162.519	143.229	146.505	182.899	161.536	209.524	227.467	144.213	155.617	152.301	171.652	199.568	152.807	194.829	146.375	170.422	177.802			179.133	147.811	170.037
876.885	282.309	269.53	338.167	306.477	301.02	327.079	273.962	229.436	244.063	228.558	263.898	209.154	258.769	253.615	281.146	451.659	285.351	340.431	273.213	237.138	287.449			176.385	135.98	157.526	154.83	163.169	142.599	145.647	181.36	161.958	207.012	227.966	142.866	154.888	152.351	171.495	195.602	151.93	199.206	145.963	168.937	178.678			178.959	148.03	170.427
879.432	284.628	270.882	330.887	304.271	300.34	329.336	271.395	229.631	246.108	225.794	263.139	210.545	261.244	251.494	280.52	446.344	287.949	337.13	267.929	237.561	288.045			174.852	134.076	158.985	152.072	160.198	139.238	146.126	180.882	161.386	202.652	233.517	142.409	153.213	151.5	172.808	194.61	153.102	202.303	148.067	168.665	179.342			175.939	144.625	171.914
881.978	283.304	269.341	322.601	303.889	298.487	329.705	271.189	227.419	243.799	226.462	261.559	213.479	258.63	255.435	284.042	434.753	284.393	335.642	263.467	240.928	286.434			170.547	133.451	159.666	151.419	156.969	138.108	141.972	175.64	159.954	203.387	229.653	142.594	150.781	152.048	173.92	198.4	151.397	196.847	144.5	169.085	176.86			174.974	142.871	169.043
884.525	279.826	265	317.712	298.3	295.997	323.072	270.671	226.702	242.582	225.269	259.173	214.226	257.498	252.161	277.918	418.991	282.696	330.856	259.41	237.707	282.622			168.656	131.479	155.023	150.326	156.046	137.042	142.029	174.449	160.948	199.011	220.797	141.724	150.27	149.81	169.959	192.862	149.814	190.649	139.737	164.015	174.879			176.072	143.783	166.582
887.071	280.776	266.698	316.136	293.913	294.209	322.38	275.643	227.367	240.716	226.778	259.191	213.999	257.393	252.129	278.937	401.003	281.248	328.318	255.271	238.069	280.026			167.106	131.857	155.703	151.057	159.161	138.7	141.86	177.792	160.698	198.49	214.581	140.912	151.802	148.344	167.691	190.517	153.336	187.007	140.347	164.113	172.768			179.269	143.17	164.44
889.618	281.557	266.099	312.62	290.867	292.034	322.927	278.556	225.26	239.571	225.726	257.995	212.11	255.372	253.41	280.758	386.271	283.209	322.7	250.812	238.624	275.72			164.839	131.829	155.231	151.952	159.173	139.678	140.869	177.839	161.445	198.101	214.231	140.945	152.384	149.055	167.515	191.117	154.514	183.906	142.465	164.777	173.586			179.83	144.095	163.601
892.165	282.414	266.37	311.996	289.48	290.941	322.076	280.512	223.246	241.188	225.98	258.528	212.985	255.3	254.735	283.571	382.633	285.54	319.141	248.278	240.571	272.408			164.604	132	154.442	151.888	157.876	139.042	141.147	175.787	161.488	199.551	216.656	142.404	153.142	151.657	166.938	193.157	153.582	182.989	142.797	164.741	175.59			179.572	147.124	164.771
894.711	282.419	268.825	314.672	289.13	290.647	321.141	282.541	223.822	242.618	227.366	260.922	214.621	255.963	255.159	287.198	391.043	287.027	318.548	248.27	243.496	271.723			166.53	131.968	154.303	152.369	158.491	140.598	141.808	174.13	161.214	204.505	218.57	143.817	154.613	154.099	167.025	194.899	153.916	184.053	143.203	164.544	175.425			180.165	149.528	166.382
897.258	282.57	272.057	319.669	289.44	289.57	321.47	284.253	228.501	242.726	227.732	263.359	213.875	254.953	254.483	290.411	404.298	287.813	318.243	249.437	245.555	272.564			169.617	131.914	154.759	154.814	161.626	145.193	141.812	174.505	161.992	210.534	220.329	144.901	157.219	156.176	169.127	194.886	156.696	188.622	145.261	166.287	173.833			181.686	150.194	166.772
899.804	287.664	276.186	330.563	291.422	287.702	321.28	286.462	237.565	246.843	229.564	266.398	214.712	255.983	254.217	293.333	413.641	287.15	319.142	250.516	247.017	273.973			174.77	135.063	156.788	158.036	166.007	146.628	143.877	178.606	162.923	212.478	224.086	148.183	162.51	160.959	170.901	194.019	159.423	200.993	145.851	171.448	175.89			184.367	151.45	166.936
902.351	290.643	276.138	339.559	294.661	286.892	320.845	288.648	239.259	248.95	231.377	267.89	216.847	258.792	257.391	294.198	419.635	291.193	321.255	251.183	249.495	278.467			178.771	142.057	159.595	162.695	171.6	148.634	147.955	184.981	164.667	210.958	224.429	149.832	167.442	166.428	174.969	200.631	161.242	209.758	148.469	171.159	177.439			187.65	147.42	168.375
904.897	290.981	273.218	341.254	300.444	286.019	324.005	285.326	240.025	248.148	231.311	272.05	217.049	258.947	257.623	295.696	426.112	290.751	325.242	252.793	248.662	279.502			176.035	140.769	160.717	160.441	172.251	149.875	150.145	182.078	165.401	213.979	229.607	149.565	169.359	162.526	175.547	198.324	161.139	209.876	149.469	171.019	178.218			186.026	153.212	167.131
907.444	290.034	272.698	346.84	303.506	290.371	329.776	286.199	237.822	255.424	234.02	269.981	215.614	259.712	257.862	294.038	429.107	287.84	327.769	256.021	247.464	280.651			176.771	140.895	161.476	158.166	169.704	147.398	151.27	184.818	166.734	215.946	234.549	149.701	167.313	158.922	172.134	200.271	160.94	206.677	152.386	173.565	180.302			187.845	153.856	171.014
909.99	289.54	273.843	354.049	310.884	293.486	333.332	287.115	238.764	254.262	236.244	271.07	215.666	262.832	257.109	292.441	432.845	287.804	329.538	262.338	248.382	284.839			179.201	140.664	162.452	157.686	168.361	147.077	152.325	188.329	167.341	216.039	235.957	149.657	166.262	155.326	172.946	204.05	160.985	205.403	155.586	177.48	183.181			186.574	152.198	171.951
912.537	288.651	275.612	356.785	318.157	296.4	336.995	289.078	238.749	252.76	237.3	273.925	216.147	265.697	257.024	293.334	439.278	288.658	335.316	268.066	249.443	288.783			181.781	141.084	163.385	157.784	170.399	148.819	152.268	189.159	168.7	214.154	237.878	149.272	165.906	156.327	173.669	204.83	160.11	203.364	156.959	178.555	183.79			186.79	151.539	172.409
915.083	287.019	277.709	357.896	322.311	298.474	339.407	291.812	241.548	253.237	237.943	274.555	218.133	268.489	256.527	293.187	438.93	290.353	342.503	271.743	248.716	290.514			184.474	141.921	162.078	158.278	173.108	149.22	152.762	189.861	170.502	211.098	235.242	150.304	164.942	159.08	174.942	205.41	159.404	202.905	156.062	179.493	183.64			189.08	149.956	172.428
917.63	285.189	280.172	361.085	324.415	300.272	339.875	294	247.038	254.087	238.703	272.97	220.238	270.314	256.482	289.782	424.549	291.009	347.394	273.739	246.519	290.071			185.249	143.57	159.639	160.521	175.734	150.157	155.118	192.234	171.448	207.186	230.277	153.196	165.334	160.093	176.687	207.566	159.839	204.407	155.314	182.75	184.852			192.103	148.025	171.459
920.176	284.206	281.894	361.584	326.208	303.785	341.468	295.283	247.495	255.39	239.524	272.708	219.455	269.312	258.986	287.047	404.536	289.055	349.847	274.453	244.988	288.409			181.757	145.744	160.605	163.706	178.035	155.081	157.109	192.343	171.416	204.049	234.188	155.142	168.092	160.35	176.142	207.52	160.796	201.995	157.012	185.776	186.398			194.435	149.826	171.633
922.723	284.917	280.115	349.981	325.931	306.436	345.353	296.762	243.741	256.482	240.725	273.447	220.037	269.404	259.17	289.755	399.378	292.586	349.14	274.269	245.296	286.806			178.532	143.377	164.701	161.347	171.597	154.649	154.774	185.4	172.125	207.397	241.295	153.077	164.741	160.837	177.076	204.2	161.925	191.753	157.755	186.172	186.08			191.917	152.649	175.507
925.269	283.558	280.062	350.696	328.12	308.633	340.211	296.974	243.241	263.329	240.249	269.68	222.228	268.029	258.551	287.814	398.86	293.9	346.618	273.638	243.719	284.359			177.056	145.722	161.311	160.832	177.246	155.317	155.135	187.942	173.092	206.212	229.678	155.079	166.948	164.81	177.545	204.457	161.712	183.234	154.008	182.482	185.762			196.959	153.422	178.36
927.816	285.061	280.547	357.002	334.446	309.678	344.074	301.953	246.231	261.537	242.197	269.308	223.644	269.223	259.53	286.672	411.994	295.519	344.118	272.863	245.809	283.742			177.973	146.802	162.024	167.377	185.635	160.389	156.847	190.09	172.11	206.517	235.691	157.536	167.78	164.597	177.074	210.311	166.357	186.096	157.631	186.403	189.365			203.183	152.607	175.516
930.362	284.604	279.741	354.155	338.991	311.916	348.805	301.884	245.318	258.786	241.913	272.059	224.207	273.328	261.593	287.832	422.607	298.295	348.787	274.392	247.049	286.87			177.122	147.854	165.898	166.27	183.979	160.739	157.78	183.632	174.117	207.837	247.188	155.476	169.406	164.685	177.076	209.131	166.85	184.452	160.47	191.644	193.462			200.76	155.321	176.525
932.909	284.392	282.625	353.573	341.289	315.554	353.443	301.465	242.94	255.918	244.431	274.292	224.567	274.822	261.81	290.262	436.466	300.328	353.173	281.424	247.052	288.948			179.883	147.42	166.767	162.359	179.215	156.388	157.332	180.628	175.615	210.505	246.696	155.035	167.403	165.886	177.625	210.133	163.998	181.824	162.642	193.264	192.52			198.261	156.027	179.981
935.455	286.674	284.672	359.264	343.515	318.671	353.24	301.935	243.837	257.839	246.057	273.041	225.45	274.86	261.529	292.866	444.996	300.166	354.474	287.432	247.081	290.401			184.039	147.282	163.167	160.573	178.262	155.076	157.855	183.645	177.456	210.174	236.617	155.307	166.561	166.456	176.953	210.837	163.564	182.315	164.208	194.149	191.06			200.914	154.951	180.435
938.002	291.555	284.812	366.834	344.081	319.473	352.492	303.529	247.829	262.164	245.658	273.339	225.237	275.181	262.594	295.342	453.006	300.165	356.125	289.874	247.311	293.023			188.391	148.374	161.838	161.137	179.509	157.13	159.565	186.994	177.967	212.352	231.3	155.242	167.797	166.388	178.315	212.015	166.489	186.973	165.444	197.784	192.086			203.994	154.549	178.784
940.548	297.097	285.453	371.547	341.891	317.881	355.075	305.114	251.781	265.829	245.796	277.004	224.011	274.612	264.312	297.76	464.78	301.39	358.905	291.071	248.62	296.129			191.603	149.538	164.803	161.867	178.723	157.766	160.895	187.849	176.756	218.533	235.42	155.649	168.237	166.995	182.689	214.893	168.908	193.422	166.237	200.99	193.862			203.402	155.025	179.668
943.095	300.378	286.826	373.165	339.817	315.252	354.278	304.458	254.313	270.981	247.191	276.212	224.954	272.178	264.907	299.731	463.797	300.524	357.375	290.964	252.052	296.901			190.253	149.335	163.579	162.381	177.471	156.628	161.178	190.656	177.755	217.109	237.019	156.815	167.578	168.735	184.108	214.582	168.243	198.099	165.789	197.297	193.76			203.598	154.214	183.226
945.642	298.389	289.514	368.478	334.642	312.02	349.802	304.427	254.49	268.1	247.091	275.951	224.41	274.933	267.638	300.168	438.269	299.664	354.92	284.568	250.39	295.931			188.855	148.51	162.912	164.345	179.439	157.224	160.191	192.315	177.301	216.112	236.855	157.22	166.683	171.723	185.929	212.448	167.14	200.162	164.57	195.407	191.731			203.001	153.634	183.766
948.188	296.137	286.699	357.895	328.826	309.862	347.904	305.367	252.897	262.313	242.658	274.184	227.87	271.516	263.897	295.642	406.663	299.521	348.801	277.892	253.897	292.677			186.588	147.829	164.24	165.96	179.686	158.449	157.657	188.99	178.213	218.46	234.187	156.384	168.894	170.641	186.909	209.493	166.758	193.656	163.843	194.873	189.447			203.328	154.048	183.703
950.735	299.527	284.29	358.387	325.867	310.13	344.906	303.83	254.915	261.794	243.969	275.727	226.78	271.753	263.955	298.504	392.302	298.29	344.44	274.795	254.411	289.302			185.821	150.063	166.663	166.237	184.779	160.412	159.352	190.684	179.855	218.15	232.807	158.703	170.91	171.901	184.502	209.538	168.685	193.596	165.4	195.705	189.777			205.295	153.459	181.328
953.281	302.9	289.15	359.061	325.659	311.734	346.302	304.666	254.95	265.663	247.738	276.776	226.776	271.503	266.754	300.114	398.57	300.684	341.559	273.868	254.475	287.576			186.243	150.552	166.238	165.902	185.042	159.524	158.759	193.089	180.953	220.707	240.547	158.698	171.124	172.189	185.629	212.027	170.527	194.981	166.191	196.155	191.605			205.593	159.447	182.219
955.828	302.973	290.395	360.129	325.137	312.573	347.603	306.152	257.993	267.531	249.438	279.539	228.018	272.4	270.652	302.494	418.552	302.919	339.526	273.048	257.931	286.96			186.539	150.813	167.325	168.782	188.681	160.58	161.205	196.602	180.198	226.171	246.141	161.484	173.898	174.122	186.898	215.56	173.082	197.237	165.482	196.809	192.255			207.568	163.987	182.486
958.374	305.974	289.847	360.742	324.088	312.086	351.022	305.757	259.057	264.416	248.745	281.054	227.754	271.723	273.068	305.005	435.709	303.854	341.053	270.676	261.155	288.715			187.793	151.111	173.884	169.823	190.838	160.578	163.056	198.122	179.66	231.396	255.324	162.408	175.554	175.498	186.52	215.809	174.291	200.506	166.232	197.444	192.488			206.967	165.301	181.777
960.921	310.921	289.781	356.709	322.294	311.361	352.777	304.176	257.049	260.709	246.564	279.755	226.782	270.992	272.957	305.515	435.386	303.292	343.223	268.752	261.007	291.393			187.874	150.036	176.759	166.257	186.324	158.468	161.282	196.44	179.391	232.217	261.108	159.682	172.949	174.944	186.272	212.26	174.296	201.247	166.575	196.099	192.55			204.52	167.062	182.45
963.467	311.752	288.321	348.512	320.194	310.227	347.935	302.639	256.262	260.517	244.397	278.256	227.384	273.43	271.465	304.386	418.231	301.772	340.672	268.808	259.192	292.213			184.786	147.511	168.822	162.655	179.872	157.106	158.351	194.173	178.331	225.617	251.079	157.417	169.579	174.298	188.115	209.061	174.154	197.682	164.141	193.065	191.267			203.949	168.596	182.727
966.014	310.597	285.633	345.244	319.94	306.477	343.061	299.928	256.64	259.198	244.3	278.864	227.651	275.468	270.324	304.65	403.175	300.745	335.683	267.553	258.954	291.01			182.413	146.221	163.002	164.481	180.069	157.488	157.232	193.416	178.295	214.185	236.839	157.695	170.721	175.271	189.719	209.27	172.047	195.159	163.333	192.862	188.912			203.181	162.684	177.347
968.56	311.499	284.165	344.614	318.113	303.998	343.112	300.166	254.804	252.93	243.097	277.095	225.466	272.618	269.672	303.898	407.245	296.853	335.706	266.032	258.21	286.27			181.935	145.796	164.03	166.757	178.854	159.668	154.713	189.392	179.837	214.417	238.786	158.369	168.599	175.539	184.693	208.959	169.414	193.159	162.251	193.819	189.012			206.44	157.625	179.277
971.107	307.682	283.455	347.681	317.334	303.265	342.535	298.088	251.41	253.326	242.545	278.413	226.977	273.251	268.45	301.499	398.633	295.658	330.206	263.695	255.364	283.332			182.998	144.144	161.778	164.734	178.977	160.581	154.633	184.558	178.559	211.727	233.859	157.904	173.372	171.463	181.55	205.092	169.525	191.455	161.923	194.518	186.626			207.166	155.36	178.073
973.653	307.477	281.866	343.048	312.619	298.955	338.286	294.685	249.407	257.61	241.22	275.675	227.955	272.868	266.122	299.724	390.313	294.585	329.094	258.895	256.17	281.183			181.102	145.053	158.852	162.349	175.862	156.508	153.132	183.658	179.236	210.187	230.922	157.087	168.022	172.678	180.014	201.665	167.33	185.422	158.202	194.582	186.88			206.678	154.625	176.47
976.2	306.727	282.969	341.75	309.482	294.973	337.132	295.493	249.447	257.363	242.264	274.996	228.229	271.973	267.085	299.918	383.141	294.863	326.788	254.886	258.646	282.959			180.548	145.498	155.489	163.072	178.054	157.451	153.172	184.524	178.145	206.699	227.384	157.421	167.908	171.358	180.814	203.122	169.303	186.934	158.988	192.125	186.491			207.564	153.335	175.626
978.746	305.327	281.793	337.357	306.54	293.121	335.241	295.47	249.78	255.652	241.334	275.978	228.581	272.189	266.664	300.041	370.123	296.076	323.672	250.346	258.716	281.418			177.254	144.417	156.777	163.177	175.482	157.409	151.029	183.341	178.689	207.107	229.035	155.424	166.399	170.42	179.345	202.758	170.129	188.062	159.18	192.091	187.25			207.237	153.883	175.844
981.293	306.017	280.464	333.313	303.678	289.87	330.699	297.048	251.275	254.239	240.6	275.841	229.477	271.245	265.142	299.296	359.959	296.156	319.484	246.43	258.465	277.969			173.706	143.564	156.029	164.014	174.791	156.719	150.807	183.616	180.629	205.885	226.681	156.343	166.964	171.446	178.147	201.397	170.378	187.652	158.331	192.698	186.598			207.354	153.907	175.319
983.839	310.36	281.186	329.953	301.129	286.945	328.299	300.733	253.127	254.593	242.767	277.616	230.905	271.146	266.334	299.577	360.565	296.237	316.544	245.257	260.657	276.577			171.333	143.827	154.599	165.909	176.652	157.659	152.747	185.091	182.92	205.196	223.146	159.821	170.629	172.938	178.834	202.042	172.228	189.08	157.858	193.132	185.239			208.416	154.156	173.328
986.386	315.669	282.734	324.507	299.45	288.008	330.19	303.572	253.395	258.644	246.185	281.952	232.331	273.527	270.171	301.371	367.193	298.447	316.508	245.692	263.837	277.992			169.402	144.935	157.147	166.842	176.608	159.209	153.313	185.613	184.756	209.363	226.148	160.469	173.051	173.826	180.166	204.52	174.046	192.299	158.808	194.684	185.405			210.287	156.653	172.338
988.932	317.801	284.424	321.18	301.056	289.507	329.643	305.83	253.836	265.572	247.709	280.609	234.016	273.736	272.142	301.6	370.532	301.841	316.525	243.914	264.775	280.393			169.889	147.176	156.927	166.905	180.876	158.908	154.121	188.752	185.071	210.836	227.366	159.935	173.915	175.959	182.708	206.455	173.288	192.818	161.388	196.067	185.599			214.826	158.116	175.735
991.479	322.219	289.603	323.001	309.412	289.818	332.187	309.769	260.476	267.382	250.91	282.716	240.674	279.051	279.732	303.68	379.639	308.371	319.105	244.45	268.469	282.639			173.693	149.469	158.067	168.357	188.013	159.759	157.317	192.505	187.123	216.75	232.609	163.967	176.465	179.295	187.408	207.61	178.118	193.199	160.079	196.955	190.519			217.404	157.753	180.504
994.025	329.968	298.257	337.47	320.232	289.317	338.063	328.47	269.416	266.976	256.333	291.609	249.424	285.287	287.253	314.337	393.666	308.897	326.981	249.207	274.734	290.146			172.859	150.799	160.526	168.168	190.305	165.216	159.774	197.145	194.524	222.47	236.9	167.742	181.64	181.281	188.472	214.066	178.291	201.524	167.084	199.247	193.191			225.296	159.065	177.757
996.572	345.554	320.134	356.956	340.823	297.385	352.157	349.426	285.566	272.036	267.768	309.897	260.517	293.233	303.858	326.734	416.807	318.666	343.121	259.154	286.281	304.551			176.12	150.026	164.174	172.893	192.391	172.497	163	204.218	201.681	229.353	237.945	170.568	188.378	182.183	190.776	216.405	180.961	210.144	171.88	202.793	199.63			230.749	164.055	179.154
999.119	358.814	331.549	371.521	349.683	305.601	372.035	355.242	289.278	277.325	282.392	324.34	261.809	296.889	321.469	339.241	427.739	337.518	363.173	273.408	301.352	316.202			179.778	152.135	163.975	175.554	195.35	174.172	167.862	207.59	203.135	230.179	236.599	172.509	192.893	185.351	193.46	222.097	185.356	217.538	173.283	205.124	203.132			231.952	165.12	183.455
1001.67	363.903	330.774	366.324	347.971	309.875	383.393	349.248	283.787	282.864	286.976	323.434	257.109	296.856	332.674	350.084	427.84	357.044	374.44	285.132	310.597	320.034			180.816	153.758	167.642	176.401	196.673	173.022	168.766	205.492	201.941	232.136	240.45	173.327	192.552	187.122	196.92	225.999	187.033	219.28	175.578	208.056	207.08			228.663	168.479	188.243
1004.21	356.265	319.165	350.68	337.869	313.536	378.458	337.336	276.385	283.284	281.019	312.187	251.09	292.615	332.885	348.278	425.329	359.842	372.657	285.645	306.96	312.153			179.623	152.666	169.195	175.182	194.082	171.414	164.39	201.265	197.916	234.151	240.334	170.313	187.615	186.357	196.762	224.017	184.871	213.587	174.738	208.602	206.742			224.582	170.52	190.753
1006.76	341.874	303.226	338.115	324.232	313.24	364.932	323.447	269.672	277.735	270.566	299.624	244.69	286.859	324.366	335.51	420.24	345.155	362.32	276.68	295.037	299.706			178.227	151.002	165.508	174.022	189.898	170.374	160.608	197.795	194.152	231.078	236.02	166.365	181.758	185.194	193.633	220.31	181.44	206.969	172.326	207.341	202.368			221.011	168.408	189.212
1009.3	329.984	291.662	330.787	314.143	306.694	353.101	312.244	263.953	269.269	260.519	290.184	238.311	281.888	311.709	322.797	410.787	327.011	349.741	265.56	283.802	292.821			177.321	150.057	161.996	173.335	186.72	168.748	160.095	194.211	192.925	225.019	235.111	164.646	178.433	184.577	190.808	218.535	179.296	203.798	171.479	206.291	197.707			217.111	164.268	185.028
1011.85	322.076	287.478	324.162	310.783	301.131	343.611	307.661	261.188	261.271	253.292	283.928	234.258	277.141	297.987	314.763	401.471	314.913	338.281	255.595	275.842	292.566			176.325	147.915	162.602	170.278	184.006	165.014	157.742	189.003	191.552	222.933	235.608	163.065	177.032	182.886	189.037	216.366	178.439	199.728	169.217	204.355	193.538			214.852	161.161	181.828
1014.4	316.456	284.01	324.377	307.895	296.696	338.115	302.712	260.959	262.018	251.603	280.172	231.987	277.478	289.812	310.111	389.805	306.261	331.225	249.747	270.37	295.541			177.421	148.331	159.812	169.187	184.684	163.309	156.769	187.155	192.246	215.475	227.381	163.941	174.481	182.311	192.166	219.081	178.754	196.941	167.604	203.34	194.145			219.655	160.159	179.49
1016.94	312.171	277.156	323.39	307.446	298.07	332.876	300.622	262.849	259.696	245.891	276.402	233.944	277.322	281.212	304.065	361.453	299.386	327.305	248.935	266.636	291.582			177.643	151.258	157.692	171.141	186.549	163.269	160.398	186.782	193.643	210.835	224.484	162.77	176.031	180.817	192.159	219.965	179.318	189.426	167.525	202.172	192.096			221.137	157.026	177.255
1019.49	305.459	273.895	326.177	310.55	299.016	333.059	305.128	259.014	254.507	246.382	274.428	234.879	278.078	277.123	300.843	353.93	298.486	328.04	251.929	263.395	289.002			179.747	150.113	157.039	171.514	188.347	169.128	161.733	185.441	191.675	211.04	232.135	163.092	175.826	181.649	191.501	218.42	178.545	183.818	169.096	207.407	194.266			222.604	156.999	177.349
1022.04	302.319	277.472	333.585	316.298	301.939	334.556	303.909	260.769	256.631	250.386	274.667	236.142	281.267	275.793	302.937	353.669	299.377	333.541	254.165	260.346	291.188			183.94	151.113	156.731	171.094	189.49	169.269	162.847	186.22	194.035	210.869	234.394	165.533	177.533	182.238	189.408	217.685	179.54	187.066	170.149	209.939	197.499			223.761	158.163	179.214
1024.58	301.579	281.601	339.521	323.317	303.978	339.762	307.673	265.559	257.963	253.212	278.368	238.5	285.313	277.074	304.613	351.159	299.81	339.108	257.281	261.459	294.107			185.714	152.051	157.871	171.782	189.579	169.735	165.388	187.872	196.72	211.317	235.946	167.486	177.982	183.426	189.331	217.011	180.623	185.278	173.612	212.758	199.21			226.051	158.786	181.171
1027.13	303.473	284.968	343.05	327.961	307.224	347.867	311.183	266.509	258.045	256.49	283.639	238.422	285.397	279.282	309.388	363.292	302.656	346.146	262.683	263.829	296.298			185.344	153.474	158.994	170.343	189.678	168.79	166.371	189.155	198.245	215.694	236.32	167.937	178.487	186.196	190.978	218.63	182.565	182.029	176.919	217.518	200.301			226.242	160.825	183.296
1029.68	308.29	288.392	347.334	329.903	311.179	356.615	313.176	268.119	259.415	258.761	286.938	237.387	285.012	281.707	315.559	391.09	307.206	353.93	270.617	267.353	300.057			187.777	154.513	160.763	169.701	189.87	167.861	167.421	189.323	199.729	221.166	236.245	168.95	179.75	189.436	192.688	223.231	183.267	183.173	180.275	222.047	202.897			225.681	162.601	185.933
1032.22	311.803	288.997	350.366	329.777	311.793	360.096	313.074	271.281	262.375	259.265	286.492	237.67	286.068	282.766	318.2	409.812	308.748	358.6	275.868	269.177	303.486			192.158	155.162	162.785	171.236	190.234	168.597	169.401	188.087	200.783	221.966	236.683	170.531	180.552	191.621	194.386	228.057	182.578	187.228	182.715	224.594	205.667			226.559	162.352	187.357
1034.77	309.863	284.252	347.859	328.812	309.167	354.784	308.79	270.023	264.706	259.579	283.192	237.828	285.112	280.745	315.893	403.269	305.402	358.08	273.64	265.835	302.883			192.991	156.369	163.153	172.369	192.186	169.828	170.164	186.937	200.02	217.989	236.61	170.839	180.446	192.159	196.928	228.949	182.943	189.346	182.262	225.846	205.646			227.905	161.823	186.757
1037.32	308.082	280.775	345.917	330.359	311.392	349.419	305.218	269.104	265.075	258.3	279.326	236.542	283.742	277.742	312.166	396.93	302.993	355.488	270.351	264.216	302.992			193.252	156.624	163.307	175.119	196.357	171.675	170.834	188.953	199.426	217.64	236.433	171.774	181.617	191.89	199.384	225.719	183.736	190.351	182.634	226.712	204.52			228.809	163.422	188.236
1039.86	310.771	280.764	349.373	327.165	310.724	349.94	305.709	272.557	263.422	256.28	281.687	238.515	284.004	276.459	315.164	396.471	304.086	351.899	267.955	264.921	301.587			197.143	157.779	165.28	176.178	195.545	174.282	171.334	189.43	199.452	224.424	246.067	172.014	182.75	197.942	202.105	228.825	188.67	190.108	183.346	230.528	202.89			231.077	167.113	189.045
1042.41	312.279	279.951	353.406	329.415	311.499	351.38	306.118	276.51	264.555	257.246	279.288	239.001	282.89	276.893	317.442	404.443	303.004	346.835	267.061	265.586	302.052			196.508	159.611	166.363	176.527	199.074	177.149	173.687	191.56	202.77	225.882	246.741	174.401	185.05	199.707	201.708	229.699	188.681	194.521	185.42	231.969	204.976			236.631	169.468	188.743
1044.96	310.802	280.95	350.9	330.13	309.345	348.448	308.174	277.794	266.37	259.181	280.178	241.708	284.266	277.632	315.519	400.237	303.618	344.341	266.885	265.029	303.385			198.269	160.704	166.049	178.913	202.215	178.216	176.519	194.77	204.409	225.262	243.241	175.493	188.196	200.507	207.306	232.772	189.898	199.987	186.739	233.298	205.556			241.04	168.273	187.583
1047.5	310.214	279.711	347.428	331.882	307.031	347.289	304.868	277.879	264.485	260.118	277.792	243.338	283.382	277.224	313.337	382.599	302.423	342.441	263.148	265.402	303.512			196.986	162.506	167.063	178.134	202.278	177.764	176.773	194.78	204.64	225.57	247.182	176.901	189.036	200.717	207.307	237.005	193.989	197.981	188.489	234.381	205.403			242.017	168.419	189.282
1050.05	306.619	278.893	342.469	335.623	309.174	345.668	304.669	281.142	267.198	260.955	278.023	250.092	285.259	276.566	311.765	366.181	302.616	342.061	260.41	265.607	302.882			194.93	162.835	167.619	180.642	202.652	179.435	176.694	194.662	206.405	225.75	251.233	177.758	189.844	203.226	208.522	240.033	195.032	193.273	187.988	237.3	204.099			244.889	169.556	189.268
1052.6	305.579	277.93	342.014	342.268	314.126	347.981	306.656	286.508	269.341	265.913	278.403	260.51	286.232	275.083	309.846	357.499	303.917	339.842	258.229	266.86	305.407			193.305	164.788	167.623	183.444	206.849	181.383	178.693	196.399	208.347	226.524	252.151	180.082	192.657	204.397	209.894	242.529	196.09	192.811	190.059	241.909	205.291			248.439	168.54	189.093
1055.14	306.989	277.216	345.048	352.406	321.666	356.023	307.903	291.321	271.312	273.197	278.57	269.959	287.149	275.607	309.471	356.346	304.676	338.535	259.027	269.701	312.158			191.728	167.384	169.248	184.778	211.753	183.559	180.976	196.752	211.355	229.188	257.149	183.06	195.508	205.938	208.73	245.089	198.03	195.611	193.771	246.169	208.987			250.207	168.856	191.667
1057.69	308.145	277.33	349.039	361.193	331.251	365.668	308.904	294.527	276.49	279.191	279.781	274.135	288.86	278.403	311.956	361.776	306.788	340.625	262.937	272.45	319.629			192.087	168.158	172.795	185.752	213.59	185.737	182.211	195.06	215.773	233.627	266.103	185.287	196.765	208.919	207.7	247.253	199.912	197.806	195.697	248.48	211.434			251.596	172.38	195.777
1060.24	311.39	277.853	354.12	361.358	337.921	371.723	310.619	296.558	281.447	283.335	280.576	271.212	288.151	278.664	315.191	371.393	312.487	342.944	264.684	273.73	323.212			196.487	168.748	175.141	186.614	215.055	186.165	184.109	196.382	218.377	237.246	268.083	187.363	198.039	209.653	211.199	249.416	203.031	199.706	197.185	249.971	211.583			255.433	174.065	197.986
1062.78	315.848	280.162	350.258	356.382	337.508	372.365	310.486	297.464	283.665	282.257	281.522	265.016	290.24	277.844	318.079	375.432	314.726	346.859	265.378	276.01	321.634			198.695	170.21	174.967	188.581	219.644	189.021	185.056	199.568	219.094	236.538	268.559	187.452	198.948	212.838	215.747	253.401	205.776	201.535	198.427	253.741	213.747			259.085	175.086	199.053
1065.33	316.281	276.732	342.093	346.95	333.129	365.619	310.688	294.466	279.723	279.012	280.184	257.861	287.562	278.998	315.41	367.407	312.605	343.324	261.859	281.38	317.879			196.795	171.465	175.782	187.654	217.478	192.386	186.065	196.608	219.838	237.257	270.138	187.468	198.566	213.582	217.299	254.349	208.891	200.642	201.496	255.435	215.091			258.705	176.187	196.748
1067.87	319.067	279.922	350.428	342.952	327.116	360.949	313.321	293.228	277.937	277.264	281.742	253.588	290.55	282.486	320.335	370.777	311.807	340.914	261.02	283.667	314.183			200.549	174.749	174.68	192.198	220.267	191.545	186.598	199.973	221.713	236.732	269.045	189.684	202.754	219.235	221.251	255.61	209.483	203.828	203.667	261.322	216.7			265.443	177.879	200.141
1070.42	320.211	282.224	352.745	341.362	320.551	359.002	315.318	296.661	274.35	273.939	285.789	252.124	291.836	280.948	319.745	369.894	312.547	339.045	258.603	289.798	313.336			200.934	174.696	176.873	194.176	221.71	196.457	188.127	199.73	223.606	236.413	268.124	192.179	204.347	222.118	221.507	255.284	210.779	203.842	204.34	264.259	218.563			266.292	179.682	200.156
1072.97	320.659	283.161	346.325	342.681	314.518	357.361	320.173	296.521	276.519	272.914	286.403	253.293	294.53	282.008	319.989	368.683	310.795	337.819	256.848	297.026	311.334			198.502	175.282	176.673	194.996	222.503	196.259	190.098	198.601	226.948	235.435	266.776	193.222	205.442	225.272	223.025	259.153	212.265	201.603	204.958	266.025	218.224			270.253	178.51	201.336
1075.51	323.966	284.764	344.431	344.317	316.042	356.894	322.361	296.807	280.399	276.355	287.664	254.599	296.251	284.387	323.63	365.528	313.693	338.557	257.67	318.078	311.175			199.602	175.918	176.791	197.069	226.215	196.732	191.985	200.709	230.315	237.644	268.168	194.402	207.015	228.464	227.157	264.313	215.299	200.294	207.879	269.337	220.741			276.539	180.364	201.901
1078.06	327.903	288.088	347.112	347.331	320.111	357.701	323.657	301.434	284.161	280.419	289.086	256.205	298.913	286.5	327.202	363.188	318.463	342.395	259.834	371.786	312.978			204.588	178.883	177.736	200.506	233.558	201.001	196.591	204.965	232.599	241.956	270.913	197.52	210.448	232.214	231.136	268.458	220.04	202.935	211.584	273.554	224.402			282.689	182.324	203.075
1080.61	332.209	291.265	349.667	351.632	323.292	361.301	326.395	307.416	285.048	283.122	290.853	258.311	301.291	289.58	331.181	363.493	322.414	347.061	262.897	518.041	315.121			209.416	182.751	181.627	203.996	239.35	206.89	200.751	206.429	234.575	246.748	277.798	200.545	214.38	235.36	234.211	272.405	223.959	206.26	215.792	279.182	227.894			285.294	184.059	205.096
1083.15	335.755	292.65	350.976	355.929	326.636	364.982	328.654	309.181	284.911	284.592	293.792	258.865	302.693	293.338	336.105	365.258	326.106	350.84	265.962	813.934	318.473			211.296	184.696	186.037	205.329	239.375	209.957	201.435	205.495	236.581	251.718	286.12	202.029	215.443	237.422	236.883	275.954	226.469	206.743	219.896	285.629	230.76			285.353	188.022	207.687
1085.7	335.643	293.364	351.37	359.234	329.176	364.242	328.259	306.979	289.07	284.534	296.459	257.494	305.485	294.793	338.246	367.704	329.376	354.922	268.068	1164.4	324.414			211.426	185.919	185.1	204.731	237.139	208.741	201.993	207.633	237.686	255.712	285.83	203.795	213.733	240.456	238.798	277.942	229.34	207.485	221.247	289.385	231.493			288.229	191.784	211.693
1088.25	338.322	294.336	349.934	359.624	329.141	367.87	328.546	307.675	290.163	285.195	298.473	260.578	305.258	295.736	340.067	374.628	332.52	357.799	273.198	1237.97	328.159			212.262	188.16	186.773	208.686	239.345	209.296	202.439	209.402	239.012	256.951	284.139	204.773	216.076	244.271	241.626	282.922	229.691	212.374	221.518	291.004	232.752			292.578	191.032	215.291
1090.79	342.431	295.29	359.17	365.896	331.318	372.548	331.656	310.478	290.276	286.912	300.814	262.742	306.349	299.513	348.898	398.778	336.327	360.781	273.582	905.079	331.714			212.627	189.609	190.092	212.07	245.996	217.445	205.201	212.238	239.969	260.404	288.383	207.239	223.053	246.347	242.938	287.886	233.331	220.204	226.116	295.289	235.744			297.159	190.809	216.205
1093.34	343.282	298.174	357.913	363.847	333.375	374.085	327.778	310.454	290.612	286.631	300.724	263.422	307.12	297.183	347.179	401.229	339.203	359.448	273.463	545.476	328.693			214.186	188.444	190.384	210.687	242.298	213.472	204.903	210.295	242.017	261.333	291.173	205.096	222.789	246.753	241.276	287.196	232.677	219.794	225.859	294.322	237.321			294.039	191.984	216.002
1095.89	346.632	301.002	361.093	367.229	337.038	376.053	331.315	310.909	296.02	289.722	303.731	264.497	310.625	301.68	347.588	404.514	341.377	364.297	276.947	389.901	329.997			214.72	188.56	191.221	211.03	241.995	211.905	206.06	210.35	241.059	265.154	288.06	204.826	222.93	246.956	243.062	289.443	233.398	213.707	226.838	294.231	236.057			294.231	196.559	218.829
1098.43	348.458	302.644	366.128	368.948	337.758	374.993	335.185	313.705	294.7	290.238	304.701	265.108	310.381	302.114	349.792	413.752	344.928	367.59	280.279	335.048	331.001			218.018	190.331	192.184	211.523	242.875	212.255	204.666	212.923	240.987	266.233	287.585	206.497	222.776	248.273	245.883	288.792	235.456	217.949	228.978	293.645	236.818			294.479	195.345	217.512
1100.98	351.185	300.291	363.754	366.988	336.695	377.521	334.959	317.019	292.24	289.127	305.299	264.938	308.181	300.935	347.357	417.271	342.363	370.046	281.155	314.19	332.11			217.181	188.93	190.722	210.788	241.191	211.061	204.271	213.413	240.413	266.059	287.447	204.599	221.107	246.404	245.526	286.844	233.367	222.618	226.937	291.745	235.521			291.691	196.361	215.676
1103.53	352.764	297.746	359.052	360.692	334.779	377.191	331.323	314.979	291.373	287.712	304.03	264.925	308.241	299.048	343.308	413.382	339.287	367.007	277.883	305.613	331.385			213.209	185.406	189.019	207.966	235.895	207.876	202.019	210.901	239.037	263.37	285.77	201.969	218.452	243.842	242.685	284.627	228.504	221.942	224.303	288.497	233.092			286.627	195.535	215.149
1106.07	352.021	297.274	355.918	356.322	333.384	373.952	328.783	310.945	290.562	286.296	302.099	264.665	308.625	297.337	341.104	402.991	337.83	361.349	273.66	301.916	328.951			209.265	183.783	186.284	204.868	232.883	205.137	198.885	209.183	237.137	260.268	282.13	200.893	215.027	241.753	240.222	281.984	225.884	217.086	222.248	285.113	231.059			282.318	192.607	214.074
1108.62	350.091	296.982	353.663	354.452	331.889	370.586	328.224	309.359	289.135	284.125	301.153	263.898	307.134	296.809	340.55	394.328	335.035	356.567	270.653	299.415	326.126			206.942	183.257	183.252	202.499	231.528	202.688	196.838	208.422	234.604	258.914	278.877	199.236	211.809	239.19	237.794	279.023	225.387	212.473	219.463	281.033	229.038			280.106	190.489	211.979
1111.17	348.739	295.081	351.804	348.769	327.973	366.018	326.95	307.641	288.189	280.613	300.413	263.632	305.95	296.329	338.618	392.35	330.453	350.664	266.259	297.892	322.9			205.492	180.248	182.891	199.811	225.695	198.748	194.231	205.221	231.275	257.301	277.929	195.248	209.618	236.056	233.713	274.647	222.431	211.204	216.258	274.877	226.128			277.858	188.642	210.247
1113.71	350.205	293.435	349.903	344.044	323.235	362.833	326.902	304.839	287.151	277.807	300.268	263.982	305.608	294.109	333.422	381.169	326.703	345.658	260.206	296.312	319.555			202.655	177.582	181.71	197.827	222.244	196.386	191.175	202.656	228.11	254.234	275.569	192.205	206.871	232.658	231.05	266.718	218.1	211.821	212.647	269.508	222.94			273.572	187.308	207.663
1116.26	356.226	293.927	347.077	344.75	323.347	359.02	328.437	304.819	287.497	281.121	301.609	264.58	305.219	295.851	337.587	374.998	326.623	343.686	258.929	299.92	318.56			202.975	175.612	179.805	197.945	221.314	194.87	190.005	202.507	227.647	254.522	272.206	192.824	207.384	230.789	229.491	264.83	216.971	210.978	209.853	266.915	222.966			272.114	187.344	206.861
1118.81	359.67	296.689	345.035	343.548	324.616	359.781	329.98	307.329	286.327	281.467	302.967	271.007	305.278	296.234	337.187	368.06	321.411	339.938	257.567	299.743	319.478			199.069	171.523	181.267	195.702	215.619	191.798	187.542	201.933	224.369	250.946	270.474	190.434	203.943	229.604	225.766	258.912	214.148	209.225	205.362	261.723	219.706			269.177	183.681	203.267
1121.35	368.571	300.078	353.307	349.188	322.111	362.762	331.019	308.946	287.972	284.281	304.721	277.015	308.592	301.141	340.071	365.45	326.12	341.225	259.36	302.558	320.681			199.637	169.879	177.374	192.767	215.576	190.478	184.742	199.683	226.253	245.998	262.108	187.885	203.407	224.979	223.922	254.961	208.832	206.064	198.679	256.263	217.491			268.95	181.856	198.749
1123.9	372.079	300.03	360.294	356.627	323.592	368.429	329.684	311.583	292.607	287.864	307.619	285.12	306.162	303.01	342.345	360.153	324.546	343.537	258.306	305.012	322.066			199.895	166.806	173.588	189.446	211.397	187.383	182.651	199.111	225.405	241.659	262.151	187.441	201.195	219.973	224.724	250.388	206.202	202.977	198.515	251.037	215.736			263.999	181.615	198.059
1126.44	370.724	294.621	353.438	359.346	329.129	371.252	326.279	310.126	292.857	293.066	305.03	290.937	304.093	302.211	336.803	346.414	323.838	342.873	253.65	304.753	326.101			193.252	164.358	171.853	185.246	204.741	183.589	177.683	194.82	222.398	235.855	258.592	183.841	197.451	215.357	218.837	244.49	201.581	201.085	193.132	245.379	212.938			257.448	178.201	197.269
1128.99	366.872	290.591	344.706	355.541	333.717	372.362	317.971	302.662	291.169	292.734	299.055	287.126	302.082	299.565	329.809	330.298	321.925	337.905	248.641	303.333	326.22			186.358	161.533	168.649	181.387	200.501	178.765	173.977	190.599	217.932	231.062	256.302	181.006	194.088	211.464	213.121	239.991	198.378	198.495	188.798	240.436	208.06			250.4	175.746	196.407
1131.54	360.102	283.203	335.658	343.115	333.424	368.577	309.156	292.5	286.842	286.416	292.985	276.048	298.709	293.952	323.569	323.148	317.204	331.97	246.333	297.977	317.666			182.041	159.835	166.756	177.615	197.988	175.545	171.393	188.563	212.339	228.624	255.191	177.017	189.782	208.778	208.411	235.966	194.689	194.45	184.489	235.514	204.199			243.081	173.611	194.956
1134.08	350.488	274.489	326.072	326.709	326.202	359.05	301.626	280.247	282.261	276.305	286.719	262.368	294.049	284.276	317.009	323.531	309.522	324.077	243.408	289.773	304.858			179.524	157.998	166.227	173.984	194.607	172.99	167.986	185.641	206.059	226.342	253.001	171.78	184.145	205.009	204.054	231.182	189.351	189.285	180.744	230.986	201.906			236.701	170.012	192.528
1136.63	341.12	271.817	320.22	314.954	314.768	346.759	294.9	267.578	279.039	264.373	281.07	249.199	289.741	273.928	310.844	323.285	300.333	315.482	238.405	283.069	295.035			178.66	154.327	163.662	170.525	190.316	168.672	164.659	181.959	200.336	222.193	249.095	167.599	178.445	199.907	200.64	225.214	184.917	184.467	179.193	226.193	199.161			231.413	166.669	189.565
1139.18	335.61	272.12	319.034	308.877	305.46	335.089	291.852	260.927	272.622	254.568	279.462	240.194	286.719	268.455	306.743	324.55	293.347	312.676	236.253	278.194	289.7			179.236	151.289	159.58	167.225	186.514	164.752	162.888	182.416	196.659	218.038	242.244	163.782	173.533	197.061	198.095	218.698	182.38	182.324	175.191	219.743	196.119			225.829	165.112	186
1141.72	333.803	271.423	319.903	301.97	298.153	330.275	290.295	258.67	265.883	249.549	279.27	235.874	282.896	265.402	304.305	331.636	289.988	307.846	233.083	274.606	288.004			179.038	149.116	155.885	167.262	182.93	162.647	160.224	182.409	194.608	216.152	234.016	162.13	171.247	193.028	200.182	216.932	180.151	183.128	170.512	217.587	192.796			221.587	162.124	181.278
1144.27	333.199	268.6	317.834	300.548	292.266	326.563	289.342	259.754	261.626	245.774	278.187	233.709	283.316	264.074	303.558	328.583	285.04	305.858	232.36	271.263	287.228			177.501	150.813	155.572	166.801	180.409	161.013	158.204	181.096	192.402	211.813	230.861	158.407	168.017	188.157	195.834	215.027	177.977	184.814	168.973	211.969	188.007			216.94	159.506	178.061
1146.82	333.269	268.189	316.355	299.465	291.489	326.294	292.826	259.75	261.564	245.223	279.479	235.536	281.481	261.091	299.963	330.612	282.32	304.784	232.454	267.096	283.428			175.586	149.254	154.793	162.259	176.45	158.385	155.417	179.599	190.389	211.504	231.358	157.687	167.624	185.787	192.75	209.677	174.405	181.518	167.117	208.017	188.856			215.336	160.769	178.326
1149.36	332.177	270.786	316.977	300.744	291.113	326.004	297.713	259	259.284	242.913	279.002	235.937	284.265	262.51	300.781	325.638	286.122	307.455	234.166	269.62	282.741			174.895	146.761	154.269	162.616	176.398	160.765	157.345	179.99	188.961	205.788	227.867	155.959	167.426	184.281	190.119	207.048	172.778	179.957	166.422	204.43	189.693			215.707	158.807	175.072
1151.91	329.493	272.362	316.013	303.403	290.927	327.042	297.358	256.558	259.44	242.188	280.539	235.426	285.436	264.456	301.911	323.446	290.046	311.229	234.683	270.785	278.627			173.353	145.923	152.405	161.013	175.36	156.541	156.039	178.139	186.647	204.992	227.978	154.33	165.026	183.305	187.533	204.849	169.972	178.474	166.499	204.457	191.5			213.902	156.515	175.009
1154.46	331.654	272.849	322.673	306.372	291.93	330.235	294.09	254.19	259.607	243.104	281.881	235.406	286.749	267.213	303.287	333.22	291.327	314.533	240.053	269.874	280.635			173.227	143.243	152.716	159.508	170.919	153.902	153.906	176.353	185.136	207.264	228.236	153.063	163.498	179.963	185.614	205.198	168.004	178.766	163.162	201.212	190.552			210.198	156.61	174.027
1157	334.609	274.123	328.559	308.441	292.748	331.7	291.927	254.692	260.471	246.686	280.775	235.254	287.444	267.629	301.187	344.68	289.29	318.791	243.652	270.407	284.081			173.949	141.228	151.88	156.953	168.934	151.666	151.743	175.222	183.977	204.978	224.711	151.115	161.982	177.142	183.341	201.477	166.442	179.22	159.879	197.591	187.421			208.261	153.497	173.901
1159.55	333.758	277.049	328.112	310.554	293.61	333.166	291.75	256.427	261.341	248.737	280.984	238.4	286.971	265.824	297.399	343.609	287.302	322.549	243.168	271.698	283.859			172.764	141.256	148.708	156.697	169.65	151.228	150.656	174.917	183.324	199.553	220.116	149.954	161.486	173.774	181.001	198.304	167.011	178.726	157.088	194.797	185.131			207.095	150.289	172.086
1162.1	331.965	277.467	324.616	312.69	295.926	334.929	291.753	256.264	259.381	247.897	281.389	243.851	287.223	264.523	294.166	332.588	286.043	322.728	240.355	272.405	282.089			168.676	141.549	147.343	157.788	168.9	149.865	150.158	175.372	182.546	196.473	218.135	150.354	160.973	171.134	178.428	198.323	166.549	175.883	155.704	192.098	184.708			204.428	149.577	169.294
1164.64	330.505	274.25	320.652	313.638	297.845	335.116	291.049	255.073	256.205	247.921	279.809	246.202	287.554	264.395	291.457	322.37	284.388	320.575	237.925	272.558	280.524			162.875	139.471	148.125	156.134	166.103	146.047	149.073	174.654	181.779	195.284	218.206	150.648	158.695	170.009	175.987	196.642	162.039	170.221	155.358	188.626	184.361			201.458	148.976	169.007
1167.19	325.373	274.115	314.663	312.638	296.848	335.519	290.6	254.302	257.394	250.101	280.481	244.564	285.014	264.178	290.171	315.47	285.752	320.062	238.578	272.077	277.326			157.476	135.471	145.581	153.567	164.31	145.93	147.707	171.443	181.878	192.885	217.318	149.145	156.368	167.241	175.187	193.086	158.598	164.525	151.883	184.512	182.286			200.287	148.012	169.575
1169.74	324.257	276.158	310.804	308.122	298.744	336.268	289.469	247.197	258.772	250.649	280.22	241.469	285.388	265.695	290.696	316.436	292.952	318.377	239.726	273.128	278.329			156.031	134.683	144.01	152.307	162.336	144.482	145.419	170.56	178.501	194.711	214.356	146.158	154.228	168.546	173.396	192.658	157.664	162.125	148.614	183.921	178.998			198.051	146.976	169.857
1172.28	322.795	275.298	306.645	304.561	296.346	334.079	286.707	239.625	257.464	246.622	280.759	236.601	285.207	267.242	292.668	324.033	293.879	321.264	241.742	276.969	279.558			156.501	133.558	143.599	151.861	161.703	139.472	144.14	169.595	175.148	194.703	212.169	145.005	154.917	164.882	169.879	189.843	158.008	166.104	147.283	180.134	177.336			192.574	147.531	170.002
1174.83	316.008	269.253	306.158	299.146	293.364	331.912	282.508	234.651	257.92	240.732	275.3	230.379	279.769	265.008	292.527	337.166	293.22	320.206	240.782	275.397	278.486			156.985	133.97	140.515	147.947	155.599	137.872	142.868	167.657	169.613	195.436	211.341	141.281	150.252	160.535	166.596	187.464	157.409	168.717	145.346	175.523	178.007			190.04	146.239	167.235
1177.38	311.625	265.494	303.556	292.346	286.177	323.379	280.097	230.401	254.386	236.688	273.762	226.207	276.286	262.377	290.107	322.822	290.691	319.436	236.75	266.758	272.654			155.742	134.127	140.677	145.96	156.045	136.993	142.35	169.829	168.888	188.212	207.205	138.595	149.583	158.618	168.542	185.566	156.082	169.591	144.528	173.168	175.404			187.794	143.233	165.532
1179.92	306.805	264.496	298.78	289.123	282.239	316.138	277.944	228.337	251.212	231.82	271.134	224.354	275.673	257.561	286.51	312.832	289.748	316.429	234.038	261.95	267.476			155.023	131.936	141.469	145.633	154.868	137.339	141.854	168.784	167.912	185.777	210.772	138.79	151.048	157.613	166.431	185.552	152.093	169.71	144.451	172.398	176.201			185.825	141.743	162.373
1182.47	304.032	264.964	299.05	286.663	279.764	314.363	276.583	227.302	250.625	230.443	270.093	223.141	273.224	255.674	284.196	301.994	287.723	313.024	232.1	259.094	264.005			153.347	131.315	139.767	149.264	158.495	139.083	141.367	170.293	166.366	183.67	209.405	138.815	150.079	154.48	164.142	181.154	148.926	164.268	143.473	170.058	176.709			188.406	141.148	161.261
1185.01	301.659	264.142	298.328	283.96	278.498	318.082	276.346	226.008	249.604	228.88	269.13	220.355	271.36	253.289	283.111	303.168	286.591	309.263	230.496	259.146	262.789			150.73	130.244	140.788	148.454	158.301	139.877	138.568	167.224	164.751	185.586	211.949	135.547	146.646	153.248	162.081	178.352	148.362	160.802	142.715	169.135	175.68			185.892	140.366	159.569
1187.56	299.276	264.843	297.893	283.009	278.514	318.565	277.633	223.455	248.973	227.736	268.489	219.353	271.427	252.008	281.569	311.654	286.808	308.231	230.553	257.701	263.261			148.049	128.111	140.327	144.892	155.07	136.84	136.086	161.944	163.497	185.871	214.207	133.189	144.582	152.193	160.067	176.567	148.232	159.21	141.193	166.612	173.561			182.376	141.062	161.771
1190.11	298.311	266.263	298.11	283.556	279.26	315.988	278.702	221.93	248.643	227.168	270.105	220.993	271.297	251.966	280.053	314.872	285.049	310.292	230.137	255.178	264.484			147.705	126.961	136.692	143.619	152.98	134.227	135.715	160.24	163.346	183.291	210.695	132.961	145.513	148.51	157.925	174.822	147.944	158.264	139.58	163.601	171.586			181.404	141.703	161.958
1192.65	300.196	267.806	298.727	285.539	279.941	317.146	281.284	223.158	249.901	227.803	273.448	223.077	271.788	252.372	280.528	319.519	284.158	313.555	229.961	255.103	265.632			148.99	126.648	135.399	143.372	151.605	134.02	136.075	163.542	164.098	181.194	206.865	133.498	146.532	145.549	156.215	173.92	147.336	159.376	138.83	163.447	171.467			181.627	140.571	157.776
1195.2	304.176	273.634	302.314	289.982	280.367	320.655	287.166	225.97	254.475	231.349	276.299	225.689	274.821	255.766	283.188	332.684	289.402	317.63	234.108	257.072	267.039			148.764	125.744	137.333	141.947	150.723	132.258	136.321	169.071	164.564	178.701	206.672	135.434	145.143	146.92	156.254	174.14	145.792	160.902	137.463	163.054	172.807			183.854	139.422	159.512
1197.75	307.068	281.494	306.283	293.916	280.989	321.139	288.372	229.36	254.996	234.03	279.149	229.838	275.169	262.256	286.696	327.847	293.141	321.699	237.561	260.773	269.854			148.505	125.892	135.211	143.731	153.633	132.138	137.328	171.745	164.665	176.664	203.088	137.365	144.236	147.407	157.527	176.579	145.778	158.461	135.28	158.964	172.062			186.004	138.226	162.37
1200.29	308.911	282.272	308.488	298.23	281.621	326.822	290.947	226.774	248.615	235.754	280.153	232.741	276.405	267.297	291.436	317.107	299.164	324.201	236.995	265.37	269.679			145.283	120.887	134.722	144.75	154.048	131.865	138.072	170.284	163.912	180.215	204.245	139.098	145.235	147.143	156.381	173.67	144.597	155.033	134.5	157.092	171.49			181.007	137.387	158.22
1202.84	315.509	285.065	305.288	293.475	285.588	327.926	292.163	227.753	251.296	236.079	283.467	230.453	275.15	270.185	293.521	326.374	298.107	324.505	236.352	265.274	267.751			142.731	119.731	134.941	140.163	145.474	129.226	135.139	167.52	162.537	180.791	198.941	137.042	142.05	143.467	150.742	164.165	144.55	152.525	133.007	156.375	169.46			176.741	141.959	160.672
1205.39	320.068	289.257	310.44	295.271	284.079	330.224	297.415	230.159	258.426	240.737	286.86	230.662	280.608	274.732	298.306	335.908	308.811	330.64	243.887	272.327	271.707			146.718	121.305	130.413	140.286	145.144	127.884	134.559	166.588	162.339	181.639	193.149	135.373	144.012	143.137	151.171	165.436	147.384	157.678	130.536	152.593	170.858			179.565	141.426	158.689
1207.93	320.611	286.847	311.461	293.224	280.361	329.135	297.713	231.841	256.167	239.301	285.581	230.993	280.771	277.927	296.756	339.324	312.97	330.709	243.897	275.711	274.275			149.112	121.958	129.58	138.034	144.401	128.126	134.469	166.629	159.846	179.882	192.861	134.642	145.105	141.852	151.917	166.044	146.364	163.468	131.068	150.936	171.177			180.051	137.172	156.865
1210.48	324.489	289.847	308.932	292.841	278.636	328.246	297.886	232.586	255.72	237.826	287.306	232.49	279.807	281.227	297.478	334.642	312.726	329.101	240.712	274.19	272.632			148.806	121.241	131.986	139.139	142.405	129.158	134.56	167.835	160.407	177.789	195.735	134.947	143.981	141.065	152.795	165.032	144.293	164.918	130.965	150.379	171.62			178.279	136.751	156.189
1213.03	326.955	290.85	306.865	293.903	278.566	327.215	301.274	236.036	257.991	239.082	289.614	231.977	282.161	280.915	298.641	324.257	311.711	328.682	241.392	276.023	270.574			148.816	122.149	132.714	137.676	139.987	128.731	133.275	167.676	161.489	178.927	195.349	133.622	141.656	142.38	153.825	165.699	142.984	162.043	130.732	150.902	171.198			179.859	135.853	155.713
1215.57	326.25	291.27	307.974	297.024	278.423	326.025	304.563	235.745	257.816	240.373	290.203	232.248	283.3	280.417	297.056	310.028	310.208	328.861	240.038	277.888	269.757			147.819	123.384	131.682	138.391	138.3	128.512	130.281	166.834	163.093	177.153	192.157	132.218	140.599	142.37	153.723	166.337	141.209	158.9	130.573	151.224	171.353			181.672	133.058	153.9
1218.12	326.771	294.599	312.368	303.668	281.15	329.849	308.081	237.214	259.908	241.921	292.928	234.264	285.107	283.234	297.828	308.9	313.422	332.521	242.2	280.443	271.932			147.432	124.732	131.982	139.127	139.844	129.501	131.028	167.458	165.978	175.786	191.536	131.708	142.339	141.68	152.78	166.434	140.633	156.971	131.73	151.202	172.745			182.8	132.379	151.437
1220.67	332.479	300.668	318.417	313.493	287.234	337.207	314.434	242.337	264.66	246.566	298.135	237.114	289.493	288.171	302.877	317.994	319.787	339.427	249.302	285.995	275.915			146.712	124.623	134.126	139.908	141.169	130.27	134.027	167.795	168.488	178.371	194.839	132.034	144.987	141.747	151.953	168.096	142.38	156.282	131.793	151.357	174.916			183.711	134.523	151.543
1223.21	339.153	307.675	326.998	325.685	294.556	346.142	320.92	245.141	269.419	253.715	305.151	240.468	295.262	293.851	308.857	325.934	325.771	348.345	257.6	292.42	281.183			145.841	122.223	134.806	142.509	141.538	130.204	135.637	168.034	170.284	181.204	196.772	133.599	146.978	142.62	152.827	170.735	144.37	156.478	130.546	151.772	176.03			185.319	135.792	154.961
1225.76	341.482	314.448	339.769	338.845	303.827	359.714	323.236	245.695	276.458	260.404	315.347	244.178	301.763	301.136	314.475	340.932	334.94	361.507	268.502	296.642	289.513			149.757	121.538	132.644	143.308	145.652	130.086	138.906	172.547	173.029	182.821	195.013	135.934	149.144	143.615	154.75	172.668	145.362	157.484	132.605	153.043	176.524			187.887	136.032	158.432
1228.31	346.409	319.801	352.361	348.9	314.938	370.729	326.145	247.727	280.203	267.298	321.033	247.734	307.25	307.829	319.156	362.796	344.682	376.417	278.788	299.733	297.918			155.984	124.83	131.954	143.386	146.37	129.334	141.949	176.895	174.115	187.375	197.049	137.061	150.465	141.718	152.469	177.564	147.63	161.953	135.014	156.053	181.955			187.18	139.331	161.496
1230.85	350.835	325.276	366.185	361.205	323.875	381.846	329.708	251.934	279.624	268.91	320.895	250.721	317.345	313.203	325.629	387.249	351.56	390.479	296.395	304.843	309.764			160.383	125.516	132.292	141.802	146.977	132.463	145.435	174.585	175.485	188.123	200.259	140.189	153.954	140.213	153.829	178.388	149.892	169.33	136.75	156.333	184.219			188.957	141.221	165.937
1233.4	347.316	327.566	375.334	373.865	326.691	386.543	334.927	255.358	285.119	274.859	322.606	252.407	319.168	317.232	325.273	387.572	355.956	406.217	305.81	307.484	317.72			166.052	128.332	134.47	141.801	149.427	132.641	150.688	182.05	176.984	187.515	202.159	141.604	157.717	140.857	153.771	180.521	151.438	172.244	137.921	159.133	187.009			191.829	141.696	167.548
1235.95	349.861	327.411	382.397	376.927	336.881	393.681	335.965	254.513	280.616	275.18	323.196	254.161	319.421	318.512	327.166	393.661	363.893	418.154	314.694	304.286	319.264			167.624	129.553	136.928	143.48	151.728	136.564	152.845	185.519	173.405	191.039	204.179	142.05	156.387	142.6	157.244	183.684	150.448	169.264	141.63	162.619	190.301			189.754	142.238	169.455
1238.49	348.796	328.959	381.697	382.236	343.827	403.782	336.954	253.741	280.101	273.474	325.359	254.193	323.394	321.779	328.893	405.005	367.704	426.717	321.708	305.081	320.882			166.658	130.073	139.246	141.348	149.823	136.509	154.072	182.283	174.595	195.118	206.08	142.308	154.857	145.322	156.89	189.617	149.758	165.725	142.013	166.33	192.543			187.354	143.016	172.052
1241.04	346.215	327.77	383.051	383.317	346.617	405.572	338.163	254.147	285.265	275.494	326.731	253.905	324.144	321.209	327.193	408.126	366.311	436.633	326.759	305.903	321.677			167.689	130.255	140.105	139.435	149.277	134.151	150.995	181.683	176.542	193.032	207.225	140.023	151.721	143.579	158.651	191.271	147.235	163.62	144.544	166.03	194.384			188.795	141.125	174.207
1243.58	344.437	328.334	381.165	385.381	347.508	406.919	341.759	254.804	289.867	279.075	326.026	252.744	324.8	323.323	327.413	407.03	369.232	442.767	330.68	306.137	324.224			167.139	131.947	139.248	140.613	148.346	134.844	148.393	181.506	175.214	191.204	208.108	139.326	151.937	144.714	159.244	193.101	144.557	159.41	143.786	166.673	194.817			189.755	139.251	174.553
1246.13	344.348	329.55	379.455	382.91	347.559	408.95	341.863	253.247	287.47	280.216	324.453	253.123	323.5	323.496	327.702	404.976	370.206	444.821	331.234	305.142	322.802			163.566	131.552	140.605	141.527	150.686	134.78	149.016	178.962	174.906	191.352	208.377	138.261	152.394	145.154	158.838	192.625	146.156	158.139	143.815	167.976	195.147			190.953	138.53	173.217
1248.68	343.772	328.076	377.804	379.817	348.123	410.166	339.143	248.931	284.077	276.942	323.809	252.781	321.906	322.319	328.904	409.151	370.02	443.928	329.805	304.383	318.392			161.195	129.422	142.073	142.932	150.369	134.015	148.85	176.783	174.828	193.513	211.989	138.142	152.407	143.721	156.906	189.173	147.84	160.501	143.38	168.126	194.967			190.84	139.91	173.32
1251.22	342.998	327.062	374.989	377.116	346.529	408.845	336.733	246.548	282.767	275.252	324.768	251.433	320.425	321.791	329.876	415.737	369.079	440.32	327.918	302.957	316.267			159.878	127.532	140.537	144.332	148.548	133.894	147.004	176.262	174.11	194.509	212.062	138.297	152.617	142.917	155.336	187.282	146.281	162.185	142.217	166.006	192.781			188.051	141.194	173.996
1253.77	342.846	327.797	373.253	375.095	343.244	405.813	335.094	247.608	281.728	277.287	325.242	251.494	319.737	320.789	330.329	413.965	367.456	435.98	325.584	301.15	318.023			159.128	126.615	138.725	144.723	149.048	133.516	146.133	176.812	173.872	192.307	206.33	137.792	153.034	142.645	155.894	187.382	144.412	163.365	140.902	164.012	190.959			184.698	140.914	172.487
1256.32	342.589	326.743	373.276	375.594	342.35	404.102	334.586	247.766	281.21	276.748	322.581	252.256	320.104	318.57	330.031	403.354	367.438	433.188	322.508	300.97	319.354			160.875	126.498	138.736	144.024	148.716	132.993	146.467	177.945	173.834	189.274	204.435	138.69	153.518	141.582	156.019	185.786	144.399	164.8	138.841	163.85	191.485			182.669	140.917	170.976
1258.86	342.166	325.664	372.272	372.48	341.28	403.447	335.478	246.661	280.469	274.033	319.446	251.677	317.32	316.163	323.985	393.736	365.349	430.738	319.005	299.92	316.609			161.522	126.719	136.503	140.802	148.291	133.816	146.848	178.28	173.619	187.435	204.187	140.054	153.126	141.653	154.082	184.462	144.487	161.559	139.15	162.275	190.2			180.6	141.618	172.45
1261.41	337.467	322.684	374.477	371.609	341.745	401.524	333.526	245.569	279.525	273.646	322.105	252.693	317.581	313.824	321.14	391.599	361.183	430.311	319.338	298.818	316.714			161.19	128.184	136.992	141.527	148.249	132.926	147.038	180.416	173.404	188.296	203.067	139.309	151.931	141.313	154.638	182.657	146.504	162.782	139.712	163.954	190.699			179.692	143.28	171.266
1263.96	335.738	321.237	371.388	370.143	344.368	403.18	335.845	245.513	277.256	273.759	321.345	252.953	316.733	312.143	319.09	392.882	361.775	430.764	321.109	296.928	314.612			161.672	125.983	138.072	140.318	147.295	131.952	146.323	176.533	171.206	190.46	203.361	139.66	150.509	140.639	153.451	184.03	144.245	159.266	138.185	160.739	190.414			180.004	144.058	170.155
1266.5	338.501	321.833	372.054	368.501	340.635	402.109	338.773	248.839	276.073	273.416	320.934	252.583	315.97	311.762	322.345	401.843	360.93	435.816	322.55	296.352	317.348			165.666	127.21	136.821	138.04	147.743	131.339	146.803	177.039	171.548	187.167	202.326	138.509	148.118	140.995	154.982	187.072	144.669	161.921	139.557	161.872	190.139			181.016	138.873	169.171
1269.05	333.83	319.246	370.264	365.945	342.029	400.89	335.544	246.099	280.583	273.8	318.616	250.32	315.77	310.836	320.872	393.945	358.194	434.487	321.239	294.911	318.737			161.828	126.779	136.826	138.323	143.716	129.306	145.648	175.527	172.342	186.087	202.273	135.667	147.513	139.946	155.987	187.413	141.934	159.537	140.66	163.777	192.663			178.972	136.075	168.691
1271.6	333.591	318.013	366.079	362.295	339.908	397.095	332.098	244.373	280.404	271.585	315.525	249.097	313.092	307.098	319.956	392.043	355.592	432.994	319.366	294.354	313.86			158.186	126.347	136.417	138.889	143.224	129.953	144.893	174.556	171.336	185.552	199.969	135.183	147.932	141.784	155.905	186.509	140.435	155.956	138.085	161.907	189.711			179.573	137.523	167.137
1274.14	330.863	316.828	362.792	358.297	337.326	396.302	331.161	242.763	276.638	270.29	314.799	250.118	312.601	307.444	317.537	389.12	353.162	429.942	317.699	294.747	310.744			157.147	124.5	135.597	137.419	143.737	129.981	144.179	171.977	170.998	186.006	200.391	134.978	149.193	141.194	155.089	185.016	140.169	156.619	136.904	157.5	189.359			178.448	136.342	167.095
1276.69	330.208	313.25	357.851	354.369	333.328	393.189	328.775	241.53	274.772	266.704	312.629	249.912	310.917	304.987	313.887	387.036	348.719	424.353	312.351	292.739	307.069			154.997	122.961	134.866	138.329	142.137	130.612	143.448	170.225	168.786	182.301	200.416	135.975	148.693	138.336	151.237	181.419	140.844	156.852	135.188	155.906	188.203			176.51	136.883	166.995
1279.24	329.416	311.254	349.862	349.992	332.019	387.613	326.869	240.723	276.838	266.898	310.809	249.865	309.426	302.092	312.391	383.656	347.139	418.405	308.007	291.252	306.681			153.198	122.886	134.035	137.484	141.678	129.261	142.712	170.135	167.682	181.519	201.767	135.499	147.248	138.23	150.788	179.309	142.181	156.758	135.336	156.368	185.188			176.344	137.321	168.276
1281.78	327.447	310.343	343.628	347.145	328.049	384.01	324.871	241.047	275.426	266.498	309.337	253.453	306.77	300.405	311.168	374.835	346.785	412.165	303.509	291.742	305.688			150.366	122.027	132.746	136.077	143.203	127.761	141.313	170.925	168.165	180.434	199.937	135.167	147.025	139.241	152.041	178.586	142.421	156.81	135.277	156.249	182.898			177.749	136.99	167.165
1284.33	326.082	308.642	341.206	349.317	324.509	381.775	323.156	243.775	272.34	266.153	307.373	264.026	305.34	299.571	311.31	362.311	345.769	405.696	297.409	293.498	303.832			148.079	120.438	131.752	136.783	142.339	126.768	139.34	170.811	168.148	178.047	197.042	135.32	145.04	138.784	151.398	176.258	140.894	155.546	132.559	156.696	181.778			178.431	135.548	164.239
1286.88	325.85	307.564	343.561	359.598	325.99	381.965	323.592	249.134	273.624	272.39	306.236	282.263	305.197	299.937	312.23	351.676	345.858	398.442	291.405	294.444	305.932			147.918	119.971	130.741	137.671	139.723	126.58	137.846	169.932	168.229	177.312	196.423	135.869	144.372	137.348	149.779	172.499	139.815	155.042	129.854	155.428	179.934			179.653	135.028	163.659
1289.42	327.185	308.385	349.432	373.166	331.37	390.211	324.918	256.701	277.524	283.501	306.865	299.359	302.325	301.09	311.798	348.308	349.144	391.289	286.382	295.284	312.944			147.323	120.336	129.767	137.219	139.952	127.386	137.045	169.092	169.003	178.125	196.651	138.225	149.914	135.782	148.676	171.234	140.954	160.161	129.782	150.519	177.44			182.862	137.081	164.523
1291.97	332.021	309.366	349.395	375.507	345.354	401.794	325.955	264.918	283.863	292.708	307.474	300.397	301.641	302.702	316.437	351.517	357.428	388.691	284.263	300.697	321.655			147.324	120.731	131.385	137.165	139.229	124.724	135.868	167.214	167.869	182.838	202.097	139.567	150.736	135.486	148.673	173.852	142.144	169.118	129.822	150.173	176.034			183.346	136.221	164.92
1294.52	337.166	310.139	346.84	366.33	348.991	404.213	329.992	265.809	289.586	291.581	307.033	289.369	302.651	307.661	319.116	341.556	366.402	384.258	285.417	303.99	319.534			148.171	120.343	131.083	135.95	137.859	124.262	134.44	169.176	169.282	184.873	204.177	139.848	150.154	137.397	149.683	174.555	141.911	173.838	129.191	148.528	174.664			184.136	135.148	165.363
1297.06	343.275	314.2	338.862	352.898	341.91	391.969	330.883	258.381	289.015	284.049	307.927	277.995	302.34	309.468	320.823	327.128	369.83	377.815	276.364	306.905	306.716			145.544	119.855	130.193	138.351	141.436	127.047	134.303	171.45	170.394	183.208	200.438	141.149	149.384	137.378	150.53	171.928	144.604	166.069	128.355	149.293	174.591			187.589	133.586	161.862
1299.61	349.288	313.56	335.464	340.37	331.969	380.682	330.188	255.631	289.611	277.017	311.713	265.755	305.832	312.515	325.59	322.334	371.656	373.2	272.899	307.567	293.212			145.15	121.347	131.284	140.439	139.902	127.316	134.824	168.698	168.539	182.609	198.631	137.628	147.666	138.118	146.801	166.114	143.476	159.062	129.004	147.273	176.686			189.025	133.477	160.136
1302.15	362.446	316.495	339.625	331.717	316.53	371.721	334.52	252.461	284.445	269.663	315.392	260.66	302.197	313.844	327.419	334.15	368.751	371.232	270.41	311.353	286.635			144.754	121.12	131.787	139.947	138.438	126.09	132.338	166.332	169.247	184.546	195.828	134.836	147.56	137.539	149.015	164.206	144.068	159.364	126.757	147.426	175.569			191.685	135.137	158.723
1304.7	372.51	321.792	342.282	332.246	309.551	370.369	336.828	250.71	283.336	271.51	320.683	260.847	304.534	316.808	331.051	346.18	367.569	366.032	271.893	315.124	288.037			144.334	121.891	130.922	142.818	141.125	125.505	134.652	169.754	169.804	185.526	194.637	136.295	149.077	137.542	149.884	164.955	145.244	167.166	127.81	145.847	175.074			193.517	136.286	157.185
1307.25	385.065	323.463	340.816	332.625	306.468	370.347	341.624	252.187	284.472	272.284	322.361	259.585	307.248	322.044	334.793	350.198	371.782	364.789	268.001	318.964	288.447			142.917	120.263	131.891	143.658	139.268	126.059	135.663	172.114	170.692	185.593	197.424	137.749	151.176	137.911	151.486	165.01	145.159	167.243	128.012	146.901	175.287			191.352	137.809	159.188
1309.79	388.133	325.136	333.51	332.148	304.844	366.57	343.345	250.8	284.709	270.687	324.407	259.779	305.988	324.428	335.503	341.899	372.608	363.442	266.93	320.949	288.809			142.169	118.98	129.954	142.063	138.725	126.321	135.534	172.54	170.211	182.465	193.882	138.065	151.637	138.625	149.074	163.505	145.99	165.561	126.235	147.552	174.86			190.678	136.676	160.941
1312.34	386.201	326.023	332.815	330.966	303.777	364.365	343.559	249.073	285.428	269.937	323.76	261.117	306.921	327.445	336.8	332.465	374.961	364.454	268.551	321.934	289.37			143.168	118.236	129.343	140.248	139.077	127.057	137.005	171.897	170.124	181.966	189.308	138.633	150.567	137.662	148.919	162.995	147.091	164.616	126.195	146.006	174.979			189.439	136.43	159.579
1314.89	382.526	326.112	338.387	329.555	303.523	366.21	345.517	247.467	286.585	269.757	324.333	260.195	307.697	330.508	339.546	333.186	377.895	366.163	270.107	322.507	290.227			146.535	119.012	129.952	141.523	141.493	126.968	138.446	172.385	169.179	182.505	190.043	138.933	150.55	136.884	149.206	161.674	147.082	164.887	127.033	145.741	175.604			188.191	137.695	159.409
1317.43	375.239	324.128	336.633	327.151	301.197	366.615	343.675	244.691	286.56	268.068	322.729	257.428	305.249	330.206	338.792	338.124	377.732	366.416	269.387	320.673	290.867			147.029	120.248	131.768	141.645	142.695	127.084	138.758	172.003	167.14	183.02	194.238	138.755	150.172	137.245	148.959	160.716	146.678	162.999	127.796	146.063	176.118			186.662	138.54	159.949
1319.98	367.583	320.679	329.203	323.83	298.632	363.502	339.881	243.022	284.784	265.679	318.756	255.156	302.186	326.784	334.533	335.185	375.78	366.261	267.439	317.127	287.959			143.544	120.113	132.824	140.018	140.487	126.76	137.506	170.472	166.286	182.729	197.435	137.42	148.725	137.446	148.596	160.323	145.679	159.055	128.286	145.071	175.256			185.839	138.491	160.318
1322.53	364.561	319.125	326.822	321.406	298.137	360.895	341	243.645	283.772	264.609	317.947	254.62	300.93	324.179	333.649	327.408	376.162	365.322	266.271	315.135	283.978			141.783	119.332	131.92	141.062	139.992	126.326	135.86	170.974	167.045	181.591	197.517	136.231	148.634	137.443	148.73	159.782	144.954	157.184	128.105	145.334	173.933			187.748	137.796	160.457
1325.07	363.606	319.937	325.528	320.692	296.29	360.01	342.619	243.374	284.789	264.809	318.706	255.158	300.093	324.971	336.499	327.314	379.258	362.708	265.212	314.888	284.688			142.756	119.042	132.473	142.716	142.061	128.395	135.561	172.189	167.969	183.005	195.738	137.269	149.4	138.148	150.622	160.882	146.275	156.892	127.905	147.888	174.847			190.051	136.85	158.385
1327.62	362.813	321.132	324.473	321.071	296.074	359.63	343.04	243.807	284.117	265.994	320.524	254.622	299.279	327.888	336.761	331.809	381.681	362.602	264.148	315.37	283.012			143.046	118.393	132.576	143.059	139.221	128.046	133.511	170.468	169.602	185.04	195.406	136.224	148.922	138.543	150.042	160.758	145.89	156.366	127.65	147.844	176.025			190.744	137.899	158.502
1330.17	366.632	324.495	333.288	323.098	296.217	361.25	346.326	248.242	287.078	266.847	323.399	258.72	300.463	331.079	343.235	331.498	385.09	361.806	263.235	317.881	285.066			144.592	120.043	131.184	145.601	142.58	129.425	133.88	170.684	169.441	184.492	192.104	136.229	150.951	139.143	149.735	160.582	147.744	160.092	126.302	145.782	177.518			194.161	139.248	158.95
1332.71	369.61	326.271	334.922	325.71	298.119	366.639	347.401	250.999	290.953	268.79	329.522	261.122	304.49	333.435	344.794	336.412	387.295	364.754	264.182	321.981	286.324			145.084	121.269	130.898	146.438	142.859	132.309	135.485	172.837	171.028	186.517	199.243	138.816	153.572	139.613	151.842	160.9	149.489	163.347	126.324	143.686	176.323			195.438	139.434	158.802
1335.26	374.069	329.449	334.511	328.323	299.189	366.5	351.695	250.536	291.942	271.859	326.928	262.534	310.186	335.389	347.084	332.259	394.153	365.563	266.33	326.345	292.743			145.388	121.089	134.047	146.955	142.406	131.71	138.293	174.692	172.955	189.109	199.928	141.681	153.017	140.325	152.545	161.309	149.031	163.191	126.863	147.088	177.036			197.443	140.226	161.489
1337.81	378.757	331.751	338.212	329.116	300.044	372.384	352.418	253.847	291.773	275.085	331.502	263.091	310.026	338.809	349.258	338.223	399.011	370.492	268.755	328.953	294.563			144.225	122.646	137.591	146.906	148.531	134.435	139.838	173.376	172.049	190.305	199.942	141.524	155.399	141.093	152.865	164.53	150.255	167.391	129.676	147.058	179.86			196.096	142.253	161.045
1340.35	382.123	329.921	337.995	327.12	303.858	370.982	349.661	250.58	293.199	272.157	329.913	260.21	311.031	340.118	348.148	341.632	398.769	370.434	270.044	329.405	293.66			146.145	121.795	137.853	143.53	144.607	130.137	138.983	173.179	171.573	191.094	205.271	139.456	153.417	143.597	152.341	166.293	148.083	166.428	130.943	148.788	180.606			198.26	143.218	164.246
1342.9	380.488	326.653	343.552	325.999	300.212	370.938	346.105	248.741	291.29	271.671	328.339	258.636	308.349	337.528	347.869	350.055	394.7	370.775	272.286	329.209	294.154			148.856	123.564	135.43	143.767	143.301	128.993	136.824	174.059	171.045	191.701	201.972	138.302	149.695	143.84	154.344	166.906	148.633	169.517	131.415	148.829	180.711			193.892	141.368	163.34
1345.45	379.035	319.651	341.67	319.918	299.188	367.874	337.056	245.254	288.109	267.155	325.884	252.579	306.438	333.516	341.506	349.032	384.731	366.41	268.955	325.475	292.401			148.567	122.515	135.551	143.193	140.402	127.73	135.109	171.452	169.443	190.053	199.823	135.251	146.209	142.754	155.111	167.565	146.613	167.767	130.008	148.558	178.396			189.294	139.567	162.393
1347.99	379.572	313.773	333.892	314.588	298.41	360.434	327.162	241.179	284.681	263.291	323.268	248.736	302.577	325.137	335.218	336.356	374.471	360.85	261.706	320.302	288.687			145.321	120.429	134.414	141.771	136.156	126.016	133.573	168.617	168.603	186.182	197.473	133.397	144.535	140.934	154.39	165.772	145.056	163.891	128.143	145.654	175.559			185.95	138.331	160.676
1350.54	379.382	309.945	324.82	309.417	296.447	353.615	320.573	237.23	280.781	259.304	319.832	246.56	300.751	318.173	328.613	320.928	362.61	352.955	254.704	316.669	282.014			142.204	118.249	131.923	140.82	135.153	124.963	131.502	166.69	167.819	183.346	192.026	131.935	143.229	139.978	152.869	162.751	143.116	161.545	124.796	143.684	173.367			183.101	136.737	158.491
1353.09	379.737	305.056	317.664	304.267	294.285	346.527	316.007	232.498	276.516	254.848	315.806	244.38	300.995	310.854	323.793	311.588	351.706	345.033	249.259	313.796	277.998			139.869	115.486	129.076	140.564	134.273	123.773	129.98	164.893	166.94	179.669	186.723	130.714	141.815	139.112	151.732	159.333	142.123	159.417	122.628	142.384	170.816			180.382	135.114	156.033
1355.63	381.411	301.932	313.803	301.123	290.983	340.432	311.095	229.41	273.333	252.364	312.807	243.603	301.182	305.365	321.677	308.313	343.957	339.002	245.231	310.517	278.413			140.197	115.085	127.118	139.111	132.848	123.13	129.309	162.795	166.374	177.005	184.628	129.617	140.672	137.603	149.777	156.305	142.529	158.726	121.662	140.671	167.872			179.652	134.819	153.887
1358.18	383.369	302.973	312.778	300.781	288.397	337.112	307.523	230.322	272.55	252.006	312.082	243.996	301.563	303.358	319.665	303.955	338.415	333.738	241.629	308.841	278.236			142.039	117.324	127.095	137.182	132.815	122.791	129.182	162.758	165.845	176.156	184.506	128.817	139.679	137.041	148.18	154.717	142.209	158.957	119.914	139.106	166.324			181.172	135.274	153.084
1360.72	383.696	302.424	311.61	301.927	288.862	334.24	304.915	232.345	272.659	251.232	312.056	244.626	301.916	299.62	316.422	295.59	334.259	329.134	237.736	309.382	276.158			140.668	117.277	126.795	137.314	132.073	121.122	129.501	163.597	165.191	172.831	184.465	128.838	137.923	137.393	148.251	154.745	140.75	155.153	119.386	138.322	166.45			182.466	134.074	153.267
1363.27	380.164	298.427	308.74	302.409	287.804	332.78	299.471	232.629	272.061	249.237	309.933	246.25	302.044	296.565	312.455	287.714	331.639	325.55	235.808	308.848	274.42			138.854	115.657	124.418	137.974	131.417	120.687	129.242	160.259	165.098	169.705	184.594	127.746	135.211	136.1	146.156	155.226	139.188	149.18	120.925	139.476	166.419			183.487	131.811	153.231
1365.82	378.731	297.405	310.858	303.864	286.384	331.973	298.676	232.329	273.745	248.226	308.627	245.038	303.809	293.139	312.226	283.21	334.96	323.956	237.488	308.984	273.238			140.682	117.26	125.23	138.79	132.756	122.098	129.064	161.212	166.413	169.205	185.733	125.981	134.702	135.348	146.954	153.401	138.553	147.305	121.815	140.168	167.131			184.641	132.185	152.841
1368.36	376.821	294.054	313.721	308.375	288.842	334.496	296.597	229.635	273.023	250.158	309.937	241.992	304.852	290.4	315.527	292.829	335.812	325.922	240.147	311.139	278.5			140.6	116.959	127.351	136.338	131.012	120.758	128.791	158.736	167.704	171.558	188.755	125.66	133.987	136.969	147.776	155.453	139.269	149.936	123.636	142.902	169.682			184.186	132.522	152.207
1370.91	373.981	293.642	314.092	310.865	293.144	338.57	293.727	227.408	273.209	250.725	307.527	241.498	305.734	287.368	312.476	294.089	337.575	332.657	241.766	309.128	278.715			140.911	116.143	127.447	136.88	129.542	120.994	128.862	156.109	167.985	174.043	188.457	124.681	130.732	135.83	149.46	155.36	138.848	145.041	121.584	140.065	168.902			182.139	131.632	152.426
1373.46	368.824	291.029	319.258	311.79	293.997	335.864	292.561	228.155	272.691	246.069	305.776	236.307	305.997	282.03	311.045	298.1	334.062	335.693	242.942	305.959	277.524			141.146	117.332	126.426	140.76	134.426	122.341	130.139	158.532	162.758	169.346	185.575	123.521	133.367	135.659	148.674	155.951	137.466	145.322	123.167	140.285	166.731			183.334	129.494	152.604
1376	362.467	293.418	319.108	313.041	297.281	341.565	291.603	224.273	275.749	248.364	307.101	235.59	305.478	284.138	312.43	302.438	337.228	337.541	250.587	306.738	281.13			143.778	118.413	129.391	138.308	133.818	122.249	133.233	159.261	164.812	170.197	192.875	123.832	134.472	136.742	149.017	157.927	138.306	149.822	124.55	146.164	171.378			178.415	130.331	154.075
1378.55	359.354	293.038	320.197	312.616	299.326	342.645	288.532	219.733	272.966	244.32	303.594	233.988	304.979	279.605	309.678	306.874	331.267	341.45	251.691	300.605	282.358			143.029	117.989	128.824	136.697	131.609	118.862	131.653	160.691	164.183	172.594	191.886	122.702	133.28	135.81	149.308	159.006	138.393	147.923	123.943	143.111	169.05			175.375	132.332	155.994
1381.1	352.987	287.597	324.522	311.854	298.514	338.478	287.196	218.745	268.965	242.069	301.246	234.369	302.216	275.506	304.943	311.573	324.284	341.096	253.754	296.439	281.095			144.457	117.29	128.427	135.452	132.794	119.419	132.68	161.109	164.14	169.538	187.111	124.977	131.546	135.773	148.772	159.476	137.249	147.536	122.255	141.775	169.537			173.376	132.127	155.199
1383.64	352.466	286.45	323.678	312.561	297.176	339.721	289.826	218.384	266.639	243.74	299.729	234.016	300.795	272.583	303.122	318.652	320.6	339.452	254.448	293.688	280.94			143.97	116.775	128.349	133.749	131.397	118.799	131.08	158.909	163.332	168.459	187.954	125.092	131.872	134.311	147.906	158.912	135.686	146.385	121.772	142.828	168.872			171.864	133.123	154.313
1386.19	354.064	286.589	321.117	312.764	297.39	341.635	290.943	219.15	264.314	241.888	300.743	234.136	300.945	272.681	301.71	319.176	316.853	339.54	252.452	291.345	280.305			142.705	117.407	126.313	132.937	130.004	118.376	128.861	157.864	162.636	167.946	185.683	124.055	131.869	134.299	146.437	159.21	134.669	145.572	120.987	141.867	168.077			170.834	132.498	154.859
1388.74	356.584	286.468	318.806	311.671	295.78	340.102	291.056	218.473	261.281	240.508	300.24	233.992	301.146	271.074	297.534	315.711	312.408	337.09	252.076	290.291	277.99			143.522	115.934	124.409	131.822	128.295	117.7	129.236	157.387	161.315	165.711	182.237	123.451	130.864	134.474	145.34	157.892	132.977	145.869	120.309	141.712	167.166			168.64	131.554	153.979
1391.28	358.27	285.66	318.016	311.032	294.439	337.154	289.86	218.215	258.962	239.252	298.617	233.7	299.876	269.029	293.646	313.503	307.584	337.373	250.112	288.63	276.394			144.123	115.396	124.038	130.779	127.924	117.424	128.752	157.634	160.081	163.616	180.141	124.029	130.171	133.632	144.387	155.432	132.454	145.911	120.879	141.126	167.978			168.083	129.9	152.346
1393.83	359.466	285.064	318.51	311.315	293.67	335.892	290.972	218.052	259.108	237.803	297.868	234.234	299.309	269.082	292.307	310.659	303.33	338.802	248.662	288.536	275.181			143.33	116.608	125.007	130.334	127.562	116.902	128.194	156.566	160.329	163.056	179.069	123.823	130.469	133.459	144.476	156.003	131.784	144.676	121.499	139.996	168.134			168.007	128.11	151.532
1396.38	357.099	284.537	319.151	310.895	293.435	335.623	293.185	217.15	260.357	237.531	297.529	234.692	298.544	269.315	291.835	308.825	301.328	337.058	250.406	289.752	274.433			143.002	116.548	124.748	130.223	126.949	116.331	128.435	154.678	160.946	162.831	178.788	122.644	130.821	132.821	144.934	157.968	130.611	143.33	121.213	140.073	167.422			167.014	127.485	150.223
1398.92	351.044	282.902	318.933	310.185	293.541	334.577	292.279	216.689	259.904	237.343	296.212	233.992	296.071	268.093	291.314	309.916	299.314	334.9	251.737	289.178	275.069			143.818	116.005	123.044	130.341	128.017	116.854	127.621	154.884	160.641	162.929	178.776	122.362	130.395	131.586	144.703	156.99	130.655	144.311	120.952	140.845	167.725			166.764	127.669	149.205
1401.47	348.62	282.764	317.898	310.626	291.692	333.986	291.277	216.887	258.616	237.781	294.626	233.659	295.999	268.308	291.756	307.302	296.276	334.661	252.167	288.467	276.014			144.621	116.659	123.939	130.865	129.513	117.052	128.14	156.346	160.829	164.43	180.188	122.388	129.794	133.594	145.862	155.431	131.001	146.873	121.351	141.669	167.089			166.842	127.889	150.555
1404.02	344.154	285.16	318.168	310.282	291.963	335.125	288.971	218.161	258.71	239.669	294.88	234.63	296.214	270.396	292.456	303.879	298.362	336.748	251.479	286.611	278.269			143.532	115.926	125.677	131.735	131.157	117.409	129.504	158.02	161.138	165.417	183.821	122.79	129.897	134.993	147.044	155.878	132.111	146.476	121.62	141.808	167.287			166.816	127.284	150.446
1406.56	333.235	281.495	317.857	310.912	292.872	336.937	286.558	215.687	258.136	238.53	292.339	235.903	292.258	264.817	291.099	308.058	297.662	334.496	247.621	283.903	278.002			139.744	114.556	124.677	131.111	130.294	119.43	127.696	155.697	158.999	165.209	181.496	124.146	131.232	132.012	144.753	156.866	130.18	145.02	119.485	140.698	165.67			163.73	127.333	149.835
1409.11	327.624	280.327	319.082	314.099	295.237	337.956	287.763	217.878	258.134	241.236	289.975	242.926	293.399	263.709	287.822	302.771	298.753	334.467	249.321	281.446	280.762			139.939	114.648	123.539	131.921	130.081	117.644	126.803	154.441	160.72	163.112	180.272	124.763	133.018	130.202	142.975	156.053	130.033	144.091	118.398	141.228	165.488			164.243	127.862	150.368
1411.66	321.009	282.998	321.786	326.287	300.461	344.063	290.747	220.012	259.341	244.885	288.877	249.535	291.778	264.942	286.307	295.141	298.536	336.176	251.033	277.629	286.188			140.815	116.24	122.949	130.097	131.462	118.401	127.864	156.406	159.68	161.097	180.177	124.785	134.598	131.422	141.759	156.676	132.023	144.994	120.092	141.507	165.955			164.172	127.948	150.911
1414.2	318.654	283.671	321.989	332.026	308.26	348.846	292.291	226.896	261.01	251.983	290.62	251.28	294.126	266.1	285.708	294.293	303.065	341.578	254.194	279.738	293.633			140.406	115.315	123.494	131.04	128.616	117.946	130.369	157.631	159.812	163.213	184.484	127.268	133.785	130.583	141.108	156.229	131.949	144.649	120.997	141.699	166.187			162.819	127.792	152.523
1416.75	316.475	284.853	325.875	334.737	311.855	354.941	292.083	224.583	259.982	252.985	291.132	253.803	294.444	266.239	285.674	302.698	307.918	345.486	257.481	279.099	292.757			140.58	116.644	125.441	130.1	128.054	116.997	129.563	156.393	160.807	163.377	184.806	126.166	132.853	128.467	141.399	159.263	132.412	143.674	120.495	141.475	166.612			163.702	126.283	153.792
1419.29	320.308	285.171	326.398	335.299	314.419	355.753	297.023	228.955	263.059	253.801	293.257	251.655	297.936	269.227	288.343	314.363	312.271	354.762	265.092	280.42	291.087			142.618	118.12	126.126	128.544	128.873	115.672	131.146	158.022	161.206	164.73	187.082	125.296	131.877	132.478	142.615	161.681	131.104	144.654	121.497	142.397	168.718			165.075	128.25	154.824
1421.84	322.631	288.998	329.479	335.119	316.531	359.418	298.84	234.091	263.019	254.341	295.762	254.415	298.963	269.8	291.161	326.463	317.156	361.805	270.617	282.813	290.246			144.984	118.919	125.583	128.053	129.1	117.638	132.67	157.226	162.427	166.063	185.01	126.693	132.997	132.759	145.273	164.335	131.979	144.2	122.333	143.751	170.434			166.797	126.877	154.66
1424.39	327.351	291.474	335.577	336.282	318.552	362.079	303.112	242.123	264.532	258.455	298.83	260.753	299.926	272.916	293.257	335.555	318.177	365.798	275.114	287.546	291.427			147.944	118.745	127.079	131.686	131.748	119.735	132.628	157.928	166.096	169.799	187.547	128.571	135.478	132.635	146.135	164.936	131.374	146.025	125.575	145.298	171.194			169.524	128.184	154.74
1426.93	332.174	297.239	340.401	340.36	319.002	364.174	310.524	254.129	268.254	264.363	302.597	273.743	300.092	276.476	295.916	335.677	318.38	367.196	275.931	291.874	294.026			147.306	118.103	126.977	133.264	132.467	121.071	132.505	159.048	170.653	170.099	188.697	130.884	139.307	133.669	145.707	166.484	131.578	147.579	125.388	147.068	173.724			172.395	126.843	154.944
1429.48	337.166	301.624	348.757	351.487	321.769	368.925	318.181	268.879	271.145	275.528	306.421	298.179	304.055	282.665	298.785	326.805	319.238	370.168	274.552	299.271	296.147			144.78	118.073	126.652	134.533	135.951	123.045	132.106	162.305	175.405	170.723	189.83	134.994	145.394	134.002	146.747	166.74	133.276	151.071	124.676	146.904	174.248			176.254	127.347	155.567
1432.03	345.353	311.147	369.287	370.091	332.076	382.158	329.059	291.279	276.616	297.631	313.47	327.994	310.208	291.315	304.163	325.553	327.772	377.143	276.73	314.253	305.315			143.671	118.501	127.515	136.859	138.573	125.513	134.014	165.41	183.517	174.169	191.658	141.985	153.914	133.665	147.067	168.331	136.039	157.975	124.496	146.725	174.52			180.955	130.931	156.948
1434.57	353.5	324.588	394.196	391.661	347.444	401.669	342.405	314.912	290.471	323.51	324.004	352.294	316.195	302.69	312.573	333.61	342.863	386.635	283.634	331.491	320.19			148.061	120.014	127.939	139.92	144.007	129.225	139.29	171.386	192.663	179.699	193.921	150.132	162.71	134.505	146.956	172.148	139.481	168.832	125.509	147.122	175.457			186.858	133.72	160.51
1437.12	361.866	336.027	410.813	411.806	366.812	427.275	358.098	328.328	305.18	345.711	335.533	361.637	324.027	318.004	324.255	346.309	362.181	401.887	295.083	345.333	336.173			153.179	123.021	131.393	142.426	150.156	134.212	145.747	178.911	197.337	189.733	202.199	156.772	170.714	136.953	149.008	178.59	142.94	178.239	130.293	150.357	180.019			190.336	135.749	166.817
1439.67	369.84	345.695	415.444	425.363	384.925	451.157	374.943	330.01	312.029	357.505	345.315	356.07	331.498	332.949	334.438	362.821	383.013	421.786	310.065	352.69	346.247			155.532	125.565	138.082	142.685	150.098	136.286	149.671	182.606	198.245	200.726	213.347	158.601	173.676	139.866	151.379	185.828	144.563	180.252	135.047	156.021	186.964			191.9	139.703	174.223
1442.21	373.676	355.623	417.492	431.344	391.369	460.866	387.522	326.5	316.316	356.713	352.523	346.177	336.077	345.529	340.857	379.636	399.043	441.343	325.836	351.818	348.003			159.413	127.688	140.615	143.611	152.313	136.302	152.121	186.124	197.571	202.67	214.848	158.362	173.254	141.321	152.297	189.963	145.76	178.202	137.67	159.938	191.826			196.036	142.031	179.975
1444.76	377.961	363.524	426.035	435.217	390.561	465.477	393.448	322.129	321.406	353.616	358.595	338.927	341.397	358.182	349.503	397.73	410.52	460.934	341.856	348.524	351.829			163.721	131.077	140.923	146.506	158.68	139.069	155.772	190.659	194.988	200.61	215.522	160.192	175.731	142.059	154.339	192.238	148.938	177.685	144.08	163.968	198.577			197.863	140.743	181.963
1447.31	383.327	364.725	429.529	436.737	393.932	473.965	393.399	316.512	322.223	349.508	361.818	333.188	344.732	363.766	355.738	421.215	420.04	475.571	356.778	348.611	355.114			165.778	131.771	145.569	144.506	151.862	138.047	154.954	186.906	194.79	206.876	228.337	156.679	170.835	145.699	156.674	195.044	148.548	177.176	148.307	168.591	205.442			194.741	144.239	182.931
1449.85	381.631	364.848	429.801	437.98	395.579	473.959	391.388	313.906	323.384	344.906	360.354	331.772	346.106	366.582	359.28	438.024	422.353	489.4	365.969	347.374	354.088			165.936	130.407	144.438	146.163	151.336	137.364	154.26	184.485	193.74	206.66	220.34	156.584	168.814	145.88	159.027	198.441	146.934	175.628	146.712	166.486	203.697			194.841	145.265	188.019
1452.4	377.242	360.902	425.755	434.03	393.315	470.548	382.385	312.105	317.639	341.892	355.077	331.641	344.659	363.641	355.128	433.372	417.708	491.721	363.824	342.334	357.416			165.794	128.15	142.437	144.432	150.526	136.486	153.322	180.563	191.608	203.457	216.751	152.628	166.822	144.624	159.492	196.246	147.335	173.555	144.903	166.146	200.984			192.74	142.29	183.208
1454.95	375.819	353.588	420.699	428.997	395.424	466.909	374.98	311.59	315.923	339.931	352.154	333.972	340.684	360.275	352.974	426.217	414.507	488.406	359.99	337.609	353.917			163.064	128.758	140.542	142.704	149.915	134.245	151.505	179.217	192.127	200.72	212.576	151.486	166.24	142.454	157.272	194.346	147.377	171.562	142.868	166.402	200.431			191.097	142.085	181.81
1457.49	371.266	349.725	418.927	424.271	396.079	464.943	370.37	307.942	314.707	343.34	348.574	333.814	339.494	351.44	346.817	417.715	408.002	485.923	353.978	333.603	350.327			162.821	126.296	139.381	141.645	146.698	133.897	150.663	179.601	193.561	196.813	211.646	150.345	165.389	142.698	157.197	192.996	146.042	171.22	139.559	162.436	197.797			189.169	141.779	182.751
1460.04	367.567	344.476	408.839	414.436	388.506	459.12	358.324	301.11	313.38	339.16	344.648	328.675	335.194	346.968	344.938	407.199	403.449	475.983	348.76	330.927	349.5			159.367	124.638	136.518	140.3	143.82	131.015	148.942	177.05	191.046	195.571	207.946	151.267	163.429	141.167	155.482	190.207	146.491	171.86	137.595	159.797	195.098			185.521	140.357	179.042
1462.59	363.422	336.513	395.707	402.401	384.283	451.439	351.119	288.199	311.715	330.662	340.893	316.606	330.853	339.442	338.93	391.964	398.151	465.772	338.164	326.319	340.89			156.265	124.17	134.932	138.115	142.732	129.539	146.65	176.789	186.628	193.409	205.051	146.605	156.681	140.884	153.372	187.842	144.329	164.285	136.399	158.563	191.861			181.389	141.085	179.578
1465.13	355.227	324.777	381.308	383.841	375.818	441.14	335.277	275.482	304.529	318.422	327.942	300.334	325.567	324.854	331.603	387.158	389.584	450.665	329.261	321.062	331.154			155.898	123.848	134.13	136.297	141.805	127.121	144.519	171.583	180.469	191.599	204.27	142.272	151.989	139.168	153.163	183.763	143.084	163.219	134.839	157.308	189.053			178.898	139.338	176.905
1467.68	348.752	310.331	363.31	367.283	366.652	421.49	318.296	260.05	296.703	301.187	316.874	283.37	318.503	311.505	323.006	374.393	375.769	433.528	313.547	314.11	318.346			151.45	122.165	134.34	135.492	138.241	123.858	140.823	169.156	172.91	185.119	203.871	138.226	147.465	136.892	151.575	180.783	141.557	158.059	131.679	156.328	186.065			174.907	137.414	173.352
1470.23	339.275	298.216	345.574	346.004	350.426	399.306	306.444	245.598	288.845	282.453	306.717	266.796	310.645	298.541	314.171	354.389	360.452	413.483	298.975	305.31	304.924			148.916	121.951	132.323	134.495	134.069	122.489	136.442	163.797	167.701	179.411	199.784	132.373	141.474	136.999	149.235	174.717	139.1	152.606	129.601	154.073	180.694			173.37	136.017	170.099
1472.77	330.701	288.601	326.691	325.617	334.488	378.753	292.885	234.378	281.22	267.26	298.164	251.99	302.773	285.754	306.839	340.233	347.8	389.75	284.26	297.647	291.427			147.329	121.226	132.004	133.855	130.896	119.857	134.867	160.453	163.029	175.102	197.346	129.171	135.876	136.527	148.904	170.139	138.975	149.092	127.758	151.576	176.915			170.51	134.003	165.648
1475.32	322.37	280.312	310.381	308.784	320.855	359.919	282.489	223.827	273.974	253.068	289.939	241.366	296.412	272.556	300.895	322.342	337.197	368.761	268.764	292.518	280.645			142.713	118.48	131.025	134.081	127.88	117.558	130.087	156.618	158.669	173.205	194.787	125.505	131.576	135.951	149.34	166.29	136.989	144.96	125.023	147.972	171.385			170.349	132.261	161.004
1477.86	316.374	273.66	299.598	294.54	309	341.692	273.04	213.402	266.043	241.826	283.207	232.319	290.569	262.664	296.614	300.334	327.021	349.128	253.994	286.262	272.776			139.687	115.972	127.551	134.166	125.547	115.027	125.037	152.272	156.596	169.016	187.384	121.75	128.292	135.087	147.535	159.985	134.018	142.042	121.751	143.844	166.536			170.55	131.317	155.08
1480.41	311.822	269.152	293.056	284.493	297.442	328.757	264.522	206.2	264.364	234.159	278.659	226.922	285.633	255.215	294.953	280.927	318.939	331.81	240.315	281.509	266.272			138.084	115.336	124.647	134.048	124.907	113.424	122.743	151.392	154.799	163.849	182.811	119.398	127.327	133.034	145.577	154.202	133.759	140.998	120.2	140.284	164.205			168.913	130.413	150.795
1482.96	308.846	263.907	288.189	275.37	289.284	319.577	257.958	202.1	262.978	227.928	275.112	224.868	282.359	248.123	293.549	270.398	314.444	316.633	229.265	280.328	259.544			135.941	114.954	123.026	133.44	124.135	111.008	121.043	149.869	151.599	161.786	182.525	117.567	125.567	131.621	144.752	150.553	134.447	140.008	118.765	138.062	161.54			166.125	130.19	148.085
1485.5	306.257	257.545	280.671	266.973	284.239	309.88	252.815	197.454	257.461	221.656	271.198	221.536	279.635	242.467	289.686	263.022	311.264	302.398	219.747	277.528	254.014			133.049	112.641	121.082	131.524	122.191	109.181	118.936	146.26	149.505	160.68	180.616	116.448	122.283	130.736	143.149	147.819	133.82	138.746	115.784	135.609	157.495			163.254	130.423	146.91
1488.05	302.016	253.363	272.601	261.758	278.744	301.811	249	192.868	254.375	216.799	266.936	217.589	277.658	237.344	284.588	252.314	305.111	291.352	211.208	272.657	250.729			130.996	110.596	119.094	129.559	120.929	109.567	118.242	144.922	149.26	157.889	176	116.441	121.079	129.126	141.031	144.506	132.471	137.831	113.143	132.977	153.724			159.826	129.553	146.262
1490.6	299.132	250.57	268.334	256.093	273.832	295.317	245.113	190.532	250.669	213.564	263.677	215.917	276.401	230.931	278.896	242.445	296.149	282.128	205.082	268.886	247.097			130.515	110.826	117.553	128.349	120.479	108.547	117.839	144.893	148.223	154.645	171.992	115.457	119.856	128.403	140.272	140.78	130.661	136.329	111.33	131.605	151.475			155.973	127.652	143.184
1493.14	297.89	246.307	262.758	250.672	269.287	287.847	241.34	187.256	243.902	208.687	261.191	213.815	273.71	225.455	271.54	232.196	287.697	272.796	198.081	263.625	243.458			128.584	110.173	116.321	126.533	119.262	108.153	115.533	144.685	146.189	151.599	170.858	113.111	116.397	128.157	139.672	139.621	128.684	133.28	109.766	129.837	150.672			154.121	125.965	141.443
1495.69	294.804	242.369	258.982	248.181	264.824	283.299	239.746	183.818	242.011	205.228	257.995	210.925	272.538	221.353	265.981	224.288	277.386	268.872	192.729	260.578	241.513			128.396	109.786	115.929	125.831	118.097	108.47	115.48	143.058	144.741	149.668	168.366	112.152	114.862	127.217	137.931	138.668	126.272	130.628	109.65	130.061	149.186			152.354	125.311	140.236
1498.24	293.469	240.562	256.17	245.784	260.011	279.756	238.623	184.286	243.175	203.634	256.873	211.624	272.471	217.958	262.772	223.683	269.001	264.48	192.297	257.385	238.513			128.688	109.805	115.849	124.84	117.429	107.717	114.944	140.242	145.509	147.745	170.541	112.05	113.605	127.25	138.208	137.927	125.02	130.732	110.548	129.273	149.437			151.988	123.428	140.35
1500.78	296.27	238.771	258.155	244.174	258.661	277.729	240.474	184.962	241.277	204.11	255.635	209.566	270.49	216.268	262.021	226.929	262.942	261.88	192.002	258.438	239.708			130.326	111.787	117.21	125.376	120	108.214	115.711	141.374	144.916	149.045	171.728	112.079	114.679	128.419	138.232	137.387	125.317	131.171	111.162	129.581	149.94			152.325	123.452	138.446
1503.33	295.664	238.335	257.92	242.987	258.11	274.988	238.169	183.316	237.905	203.673	254.766	207.127	268.45	215.334	261.949	223.77	259.358	259.505	188.591	256.928	238.022			130.846	112.357	118.953	125.604	118.494	109.869	115.485	141.219	146.888	149.765	175.622	111.447	113.786	128.881	140.289	140.846	124.981	131.234	110.717	130.001	150.665			152.094	121.939	137.183
1505.88	297.333	235.376	256.905	240.832	256.841	276.744	236.564	183.423	234.884	201.76	255.206	208.532	267.249	212.952	261.727	223.511	257.572	261.349	188.791	257.133	237.079			128.77	111.684	118.675	127.687	118.68	109.734	114.187	140.814	144.276	149.643	172.934	111.546	115.269	129.161	139.408	138.386	123.332	131.512	111.534	130.308	151.337			152.521	123.381	138.652
1508.42	297.604	235.977	254.662	240.782	257.683	274.468	236.353	181.628	236.411	201.123	256.687	208.563	268.143	211.972	258.143	225.62	256.727	258.347	187.699	255.891	238.291			126.781	111.81	118.019	127.255	119.016	108.472	114.92	142.353	145.106	150.937	172.261	111.35	113.717	129.942	140.086	140.734	124.327	135	111.845	131.65	149.689			150.735	123.455	137.752
1510.97	299.289	236.123	254.216	239.004	255.089	273.988	234.871	179.981	236.244	200.572	256.714	205.5	267.463	213.062	258.313	224.92	256.525	257.187	186.43	255.903	238.786			127.093	109.033	117.206	125.572	116.37	106.502	114.775	139.693	143.112	148.833	171.522	109.199	112.573	129.16	139.767	140.142	123.669	133.134	108.839	129.857	149.135			150.35	121.201	138.825
1513.52	300.63	236.385	254.112	238.973	253.826	274.349	233.448	179.668	236.147	200.895	256.414	206.867	266.917	211.602	257.959	224.605	254.965	256.72	186.442	257.342	236.242			127.326	109.616	115.628	124.279	117.556	105.341	114.171	138.953	144.261	147.14	166.796	110.128	113.033	129.923	139.495	137.243	124.786	129.408	107.763	129.554	147.072			148.534	121.918	137.75
1516.06	302.294	234.864	252.037	238.264	252.488	272.466	232.856	178.288	232.577	199.197	255.767	206.574	264.561	209.651	254.135	228.112	249.068	253.2	185.194	254.852	236.316			126.423	107.676	114.604	122.791	115.665	105.98	112.578	139.197	143.666	144.454	166.445	110.283	112.693	127.913	137.638	135.472	122.426	129.521	106.924	127.988	147.536			146.531	122.012	137.304
1518.61	303.286	234.337	248.879	237.28	251.163	268.976	232.162	178.172	232.308	198.129	252.623	206.221	266.831	208.979	251.741	216.998	244.583	251.824	181.683	254.779	235.849			124.673	107.201	113.204	123.081	115.673	105.444	113.251	138.16	143.744	143.265	165.407	110.571	111.427	126.399	138.015	135.234	122.112	130.645	106.209	128	145.757			146.533	121.424	135.421
1521.16	305.298	232.994	247.932	236.544	250.393	267.817	232.541	179.343	233.003	197.188	251.878	207.304	266.166	205.596	251.963	211.945	243.247	252.116	182.056	255.193	233.385			123.684	108.741	113.128	124.054	116.297	106.72	113.971	140.36	144.464	143.534	166.054	110.511	112.479	125.184	137.099	133.809	123.393	129.587	105.973	125.538	146.286			148.437	123.19	135.551
1523.7	307.191	234.772	250.144	236.509	249.041	267.634	232.813	180.549	234.842	198.92	253.039	206.93	267.123	205.964	252.086	213.852	242.421	251	180.488	256.133	233.044			124.618	109.197	114.056	123.97	117.301	107.829	114.475	141.833	144.383	143.006	166.871	109.532	113.092	125.23	136.315	133.798	124.077	130.567	107.729	127.109	145.774			149.562	122.468	135.259
1526.25	312.226	235.652	250.694	238.458	249.138	268.326	234.878	181.858	235.797	198.879	256.429	206.538	267.686	207.683	252.459	222.397	244.899	251.973	180.637	258.197	233.933			127.165	109.157	116.399	124.121	116.685	108.072	113.748	140.862	143.925	145.596	171.683	109.875	113.007	125.669	136.775	134.848	122.782	131.57	109.15	127.957	147.241			151.143	122.07	136.223
1528.8	317.501	236.819	252.194	239.766	250.4	268.83	236.687	183.331	235.019	197.468	257.468	206.711	267.294	209.152	252.424	227.074	245.395	252.062	182.398	259.79	234.952			127.96	110.541	117.637	125.445	116.919	107.932	113.7	140.41	143.656	146.232	172.857	110.145	112.159	127.956	137.713	136.297	121.838	133.203	109.985	128.481	148.561			151.795	120.485	136.366
1531.34	323.148	236.254	253.523	240.184	251.982	270.522	236.565	185.236	234.357	197.996	258.103	206.173	268.136	210.995	253.767	225.845	244.973	251.811	183.077	261.02	235.131			128.434	111.635	117.653	125.666	116.157	108.352	113.172	140.914	146.587	147.148	172.12	109.378	112.554	129.225	138.567	137.917	121.065	132.873	110.373	129.442	148.601			151.957	120.59	135.17
1533.89	328.431	236.97	252.913	240.216	253.081	269.083	236.865	186.559	234.145	198.817	259.653	206.274	268.627	209.981	254.245	223.742	242.725	251.346	183.408	261.579	234.612			127.084	109.749	115.884	123.903	114.643	107.842	112.066	140.332	148.388	146.655	169.425	108.811	112.343	128.965	139.547	137.119	120.832	130.835	109.047	129.256	147.617			151.653	120.676	135.368
1536.43	335.822	239.358	254.571	241.382	252.379	266.911	239.01	187.043	235.429	199.558	261.754	208.758	270.397	211.914	253.996	220.541	240.625	252.635	183.004	263.625	234.759			124.326	107.799	114.829	123.787	115.302	107.781	111.584	139.977	148.472	144.843	167.086	108.948	111.93	128.985	139.67	136.186	121.954	129.904	107.315	127.851	146.752			151.048	119.461	135.81
1538.98	343.867	241.249	258.99	243.355	252.029	268.729	240.2	187.487	238.035	201.955	263.92	211.048	272.979	216.872	255.445	218.103	241.241	254.979	182.976	268.572	235.5			123.119	107.868	115.183	124.997	116.313	108.118	111.519	139.817	148.315	145.531	167.354	109.631	112.555	130.017	138.709	136.495	122.554	129.098	106.266	126.233	146.142			151.34	119.732	135.531
1541.53	348.939	242.734	261.089	244.408	253.256	270.374	240.472	188.205	239.471	204.051	265.537	212.723	273.682	218.656	257.388	220.126	241.53	254.323	183.783	271.03	235.623			122.553	107.504	113.806	124.583	116.545	106.863	112.28	138.824	147.391	145.746	165.825	110.584	113.602	129.949	137.877	135.868	123.342	128.879	105.435	125.592	145.73			152.991	120.772	135.723
1544.07	356.091	245.134	260.023	245.627	253.479	271.562	243.117	189.771	240.628	205.29	268.152	215.474	275.538	221.978	257.996	224.695	241.355	253.645	182.996	271.699	236.527			123.078	106.696	112.594	123.933	118.585	107.132	114.105	139.461	148.186	144.101	164.537	111.488	115.588	127.697	136.752	134.584	125.318	131.396	105.523	126.325	146.544			155.506	120.867	135.908
1546.62	365.293	250.375	258.582	247.575	254.197	275.318	246.656	193.329	243.129	207.786	271.768	217.451	277.885	226.393	258.387	227.078	242.114	255.378	183.542	277.749	239.59			125.718	107.024	113.715	123.636	120.229	109.404	115.386	141.711	149.259	144.821	168.343	112.901	116.969	127.323	135.576	132.856	125.139	134.044	106.682	126.7	147.196			157.424	121.27	137.73
1549.17	371.81	251.533	260.711	250.355	255.59	276.994	250.31	198.589	245.955	209.181	274.761	220.751	279.271	230.116	262.5	224.226	244.29	256.946	186.011	281.639	240.867			126.82	108.832	114.771	124.818	120.231	110.152	116.681	144.829	150.452	146.709	172.014	114.32	117.965	128.138	137.209	133.869	125.643	136.277	108.697	126.093	147.547			158.859	122.646	140.804
1551.71	376.874	253.234	269.285	252.877	254.986	276.812	253.939	201.824	249.342	211.639	276.396	220.622	282.374	233.865	265.413	229.182	248.432	260.167	187.985	283.988	240.551			128.645	111.769	116.675	127.492	122.921	110.906	118.822	147.92	151.179	147.552	171.024	114.792	117.52	129.691	139.999	135.896	126.308	138.017	108.781	126.002	148.486			161.573	122.898	140.363
1554.26	382.862	254.145	273.172	253.742	255.631	279.959	255.151	202.863	246.189	213.427	277.13	219.748	284.399	236.239	266.723	232.316	252.673	261.215	188.684	288.378	242.797			130.69	111.811	121.224	127.876	122.388	112.06	117.469	147.219	152.411	149.484	178.372	114.685	117.764	129.537	139.781	138.875	125.825	139.149	109.501	128.18	152.266			163.069	123.895	139.098
1556.81	382.171	257.741	266.66	254.61	255.112	279.866	254.666	200.778	249.975	210.454	279.451	220.586	284.93	237.632	267.36	228.29	255.72	262.964	189.651	292.233	239.331			128.773	110.948	122.637	127.879	117.82	110.298	115.244	143.303	153.216	151.719	178.981	113.136	117.23	133.099	139.892	139.967	125.817	136.091	110.798	128.998	153.195			165.161	124.878	139.931
1559.35	378.005	256.793	266.236	255.211	255.041	278.415	253.313	198.905	254.041	212.854	279.536	220.082	284.635	239.646	270.517	224.231	255.811	266.441	190.434	292.346	237.367			126.765	111.407	118.299	129.507	120.201	111.389	114.968	144.501	156.007	149.683	173.343	111.525	116.32	131.513	140.844	140.787	125.768	132.442	110.302	128.539	152.471			168.237	122.139	138.094
1561.9	378.058	260.443	273.052	258.47	255.25	280.796	251.937	201.232	255.667	215.496	282.082	220.47	286.17	240.764	273.938	222.9	262.635	267.477	190.821	298.59	239.99			127.088	110.204	117.331	132.539	121.384	111.298	113.708	143.909	155.613	148.495	171.469	111.574	116.839	131.449	141.216	140.792	126.836	134.213	109.523	128.161	152.482			168.486	122.657	137.259
1564.45	379.654	261.325	278.291	260.885	258.036	282.678	249.399	200.059	254.514	215.911	282.814	223.998	287.473	242.075	277.352	223.349	266.95	265.884	191.581	299.783	242.438			127.507	110.97	117.7	133.874	121.561	112.387	115.908	143.626	155.26	152.074	177.548	112.573	118.591	132.618	141.557	141.144	129.008	134.494	110.372	130.179	151.064			170.675	123.747	138.09
1566.99	380.969	261.765	272.883	261.434	262.122	286.911	251.549	201.76	262.44	214.899	283.033	221.258	288.198	241.915	280.12	230.166	271.874	267.374	191.881	304.157	241.376			125.08	107.892	117.231	130.914	120.063	111.531	114.394	143.062	156.013	153.503	177.503	113.105	118.369	133.571	142.129	137.391	130.183	136.075	108.887	129.058	149.443			170.756	127.434	141.504
1569.54	384.481	264.122	271.694	261.704	263.259	283.848	253.41	201.272	264.943	218.377	286.689	224.434	290.609	244.444	285.11	231.698	276.156	266.484	193.097	308.007	244.786			127.882	108.943	117.748	130.621	120.783	110.876	116.173	146.536	156.093	155.747	172.561	114.208	119.841	132.716	141.784	137.262	132.095	136.865	107.858	127.519	150.208			172.314	127.111	141.348
1572.09	384.755	264.812	272.984	260.409	262.554	280.865	256.551	205.089	263.493	219.508	286.771	224.435	291.869	246.955	287.537	224.014	283.285	266.033	189.255	312.923	244.191			127.374	110.002	115.941	132.145	124.641	111.392	118.75	149.018	154.2	154.17	172.993	116.532	120.922	130.594	142.451	139.325	134.38	138.799	108.385	126.78	149.303			177.669	127.282	141.835
1574.63	389.714	267.58	273.725	261.366	262.646	285.177	258.186	203.861	268.53	221.135	293.491	227.134	296.369	250.79	291.749	224.675	293.024	266.698	190.61	317.937	245.921			127.439	111.454	121.311	131.819	126.248	113.233	120.405	152.885	154.02	156.346	181.168	118.188	122.827	132.398	142.965	138.23	136.377	141.414	110.112	130.208	153.121			177.103	127.775	141.34
1577.18	399.063	269.053	273.249	262.897	261.104	285.241	259.524	203.626	266.827	218.751	294.549	230.237	297.944	253.243	293.616	231.867	296.007	267.725	193.327	320.051	245.233			128.653	110.677	122.446	130.661	122.008	111.769	119.292	149.664	155.449	158.018	184.754	117.671	121.074	131.926	143.31	138.503	136.192	139.867	110.583	130.102	153.395			177.607	128.245	142.472
1579.73	405.476	272.618	275.336	264.885	261.367	286.737	262.605	205.895	267.035	221.304	296.413	232.835	304.844	257.894	296.135	228.259	297.839	270.679	194.142	326.671	246.794			129.785	110.28	119.867	131.953	120.71	113.009	118.8	148.264	157.913	156.486	178.911	116.751	121.102	132.587	143.037	139.056	134.023	137.544	110.603	128.746	152.151			179.176	126.684	141.871
1582.27	410.982	276.39	279.156	266.951	262.218	290.81	264.996	209.894	268.954	224.284	300.647	233.393	307.369	262.034	297.109	227.156	296.405	273.804	194.554	333.52	246.591			129.094	111.347	119.821	133.437	121.875	113.936	119.571	148.114	158.23	155.359	176.164	116.996	120.717	134.975	144.541	140.711	133.442	137.671	111.64	127.559	153.361			180.064	125.219	140.42
1584.82	417.319	275.574	280.947	267.294	262.887	293.916	265.981	210.019	271.642	226.394	302.959	232.723	308.05	264.347	297.738	228.762	294.59	275.661	197.447	337.747	247.004			129.644	111.28	120.153	133.468	122.81	113.523	118.864	148.228	158.046	155.317	177.702	116.455	120.407	136.721	145.329	141.647	132.198	138.06	112.061	130.407	154.922			179.041	125.574	140.854
1587.37	413.106	275.553	278.593	266.531	263.694	295.407	265.819	208.485	271.842	226.897	303.912	232.557	308.171	263.269	294.823	225.735	288.366	276.789	197.623	339.674	246.787			127.994	110.968	119.463	133.17	123.266	112.377	117.487	149.42	159.004	155.681	177.828	115.276	120.716	136.298	145.973	141.508	130.958	137.399	111.651	131.141	155.627			177.147	126.017	141.399
1589.91	406.876	275.728	280.649	268.375	266.16	295.727	266.893	207.181	270.999	225.709	302.93	232.358	306.526	262.636	294.764	227.497	283.059	279.307	197.918	337.549	248.881			126.673	109.981	119.445	133.11	123.753	112.565	118.354	148.774	160.098	155.658	177.766	115.557	121.046	136.34	145.998	140.726	132.978	138.103	110.469	132.791	156.786			173.523	126.688	142.422
1592.46	398.419	275.479	285.264	270.007	266.855	295.591	267.256	205.758	269.251	225.102	301.735	232.595	305.179	260.063	292.987	232.298	279.836	280.648	198.549	333.373	251.181			127.38	109.479	119.321	132.203	123.221	112.93	118.978	148.09	159.897	155.781	177.4	115.727	121.594	135.671	145.718	140.797	133.445	139.948	109.524	131.398	155.372			170.82	127.106	142.663
1595	390.953	274.984	289.242	271.849	267.688	297.078	272.507	206.824	266.432	225.931	300.135	233.093	305.677	257.834	290.135	233.069	277.387	281.798	200.054	328.183	254.331			128.926	110.328	117.557	131.67	123.013	112.949	120.388	149.907	159.84	154.795	175.961	116.678	122.988	135.45	145.719	142.04	133.308	139.41	110.057	129.763	154.8			170.247	126.423	143.012
1597.55	387.978	276.625	292.322	276.339	270.249	300.107	280.438	209.23	267.575	229.007	301.18	234.265	305.781	257.942	288.965	235.931	278.182	286.133	202.631	324.727	257.654			130.527	111.36	117.389	131.499	125.406	114.087	122.711	152.945	160.355	154.326	175.864	118.766	124.833	135.854	145.018	142.774	134.506	139.909	111.582	130.547	156.847			169.928	126.941	144.056
1600.1	388.304	280.667	292.672	281.211	272.886	305.882	286.128	210.769	268.87	233.387	305.076	237.737	305.871	260.736	290.444	244.372	282.708	293.333	207.72	324	261.111			131.277	112.483	119.704	131.187	126.962	115.768	124.389	155.766	160.529	155.698	179.188	120.746	127.148	135.41	145.553	143.107	134.511	142.578	113.018	131.004	158.691			170.175	128.731	145.716
1602.64	388.98	283.638	290.614	283.364	274.054	313.01	289.581	212.092	266.935	236.694	306.436	238.97	305.744	265.4	293.177	250.752	287.561	300.534	214.418	324.483	264.691			130.924	113.679	121.192	131.953	126.096	117.083	125.111	155.606	160.59	157.456	181.423	122.05	128.076	135.447	147.091	144.958	133.391	143.304	114.453	132.347	159.785			170.297	129.184	147.628
1605.19	387.34	284.976	289.976	283.025	275.55	316.207	290.99	213.023	267.486	237.597	305.553	236.973	303.911	267.216	293.329	252.993	291.249	306.525	218.468	324.999	265.952			131.033	113.964	121.611	132.464	126.013	117.998	124.561	154.754	161.49	158.861	180.17	121.646	126.619	136.063	146.649	147.68	132.583	142.622	115.468	134.758	161.256			168.907	129.376	148.592
1607.74	383.551	286.18	292.382	283.261	278.667	316.664	293.646	214.525	269.311	237.294	305.413	238.36	302.839	267.341	293.3	256.426	293.942	311.076	221.586	325.624	266.213			132.764	114.387	122.471	131.909	126.073	118.314	124.737	156.527	163.03	159.365	180.553	120.978	126.688	136.918	146.965	149.215	131.856	141.779	115.71	136.312	163.133			169.014	130.054	148.836
1610.28	374.882	287.136	294.168	285.271	278.957	317.339	295.601	218.319	270.667	238.864	306.19	239.21	302.22	269.007	293.678	257.688	294.674	314.524	223.387	328.781	265.645			134.544	115.572	123	132.918	125.595	118.514	126.214	155.377	163.807	159.523	181.02	121.649	127.953	138.903	148.685	149.571	131.834	140.537	116.436	136.901	163.485			171.594	129.161	147.877
1612.83	368.144	287.197	294.389	287.647	280.294	318.833	297.37	222.27	271.318	240.212	308.321	239.401	303.347	269.744	294.425	253.526	295.997	319.519	222.347	330.733	265.593			134.142	116.288	122.727	134.012	126.164	118.557	127.346	155.525	164.9	160.312	181.118	121.383	127.135	139.886	149.305	150.215	133.143	139.646	117.725	137.087	164.732			173.751	128.41	146.97
1615.38	365.423	287.982	295.199	290.89	281.959	322.475	299.465	222.959	270.991	241.866	310.314	243.144	307.227	269.198	295.102	256.997	297.903	321.209	225.234	333.599	266.926			132.265	117.316	124.604	134.136	128.328	119.831	127.77	155.567	166.255	162.816	184.909	120.804	126.678	140.224	150.081	152.678	132.996	140.175	119.051	137.875	167.132			174.697	129.088	148.127
1617.92	362.689	287.319	297.61	293.414	285.457	324.793	296.376	224.347	271.65	242.463	309.644	240.566	307.544	268.965	294.5	262.294	298.132	324.511	229.43	334.621	272.337			131.388	114.734	124.196	134.089	128.416	118.902	126.762	153.874	167.709	162.719	183.277	119.971	127.256	139.261	148.103	153.161	134.562	140.553	117.184	136.499	167.12			174.514	130.163	149.185
1620.47	362.767	286.705	301.959	301.088	288.462	327.363	294.972	223.876	274.386	243.002	309.628	242.468	313.774	267.731	294.032	265.143	295.567	330.935	230.367	332.198	275.832			132.465	113.965	123.204	133.069	128.969	118.628	127.01	154.737	169.791	161.823	183.943	121.829	127.051	138.577	149.417	154.79	134.076	141.873	119.674	137.639	167.188			174.303	130.22	150.698
1623.02	360.496	288.857	306.713	304.662	293.688	331.461	294.191	225.521	276.691	244.473	311.338	243.658	319.287	262.92	293.261	265.157	292.029	335.446	234.403	327.27	278.805			135.29	114.066	120.694	133.637	129.31	116.941	128.554	157.216	169.194	161.702	183.289	122.225	127.108	137.348	148.519	156.032	134.617	141.501	118.451	137.792	166.492			173.416	129.352	152.773
1625.56	360.291	289.534	317.577	312.269	298.881	338.569	297.976	228.188	279.718	246.25	313.958	248.34	323.477	263.097	290.954	274.731	293.234	344.409	242.686	321.88	283.746			136.691	117.087	123.141	134.007	134.585	118.873	132.597	161.802	170.01	161.648	183.51	124.835	129.412	137.082	149.627	157.642	135.268	142.708	120.684	140.554	167.683			174.324	130.577	153.83
1628.11	361.122	291.845	323.489	316.944	304.567	343.726	303.022	230.243	276.523	247.275	314.376	247.749	325.782	262.239	293.126	293.985	294.389	356.437	252.329	324.079	290.035			139.913	116.419	125.219	132.45	131.526	119.99	135.09	163.414	168.6	165.085	191.163	125.141	130.526	137.253	150.78	161.87	133.381	146.047	121.57	142.134	170.195			173.45	133.04	155.713
1630.66	359.95	293.929	320.858	321.036	308.63	350.265	306.183	232.07	274.785	249.255	313.463	249.226	327.509	261.852	293.74	297.273	295.847	368.151	258.867	323.207	293.101			142.809	118.005	127.076	132.863	131.703	122.296	134.71	162.422	168.778	164.793	190.437	125.468	130.146	138.397	151.096	163.537	134.289	145.048	124.202	143.23	172.866			174.642	132.98	156.482
1633.2	357.523	298.665	323.893	322.997	311.026	352.418	311.406	232.494	275.471	249.256	314.232	253.641	328.437	265.825	294.309	301.317	302.357	375.719	266.425	323.39	294.463			143.561	120.283	125.315	134.472	132.178	120.73	135.204	162.724	170.073	162.913	188.149	126.381	130.731	138.274	151.961	164.841	132.35	141.926	124.832	144.545	174.827			176.383	129.191	156.049
1635.75	355.27	302.642	322.769	326.436	312.982	357.601	322.828	235.712	279.409	253.239	314.817	252.471	327.211	272.319	299.149	301.785	306.125	386.051	272.586	324.574	292.393			144.126	119.043	128.207	134.216	131.19	123.494	136.638	164.463	170.232	164.331	189.767	126.65	131.74	140.763	152.323	167.624	135.179	142.581	127.107	146.574	177.519			177.743	129.091	157.524
1638.3	354.523	308.499	326.193	328.048	318.35	361.833	329.805	235.694	278.078	256.11	317.675	256.19	329.636	278.241	304.488	308.922	320.039	395.071	277.067	328.807	296.21			143.192	120.61	129.126	136.898	132.523	122.322	135.703	163.987	169.445	168.758	193.297	128.694	133.366	141.276	151.081	167.955	135.571	140.557	127.358	148.345	179.826			176.651	130.947	157.034
1640.84	350.51	310.417	327.794	329.459	318.903	369.046	336.361	234.829	278.821	259.048	317.714	257.32	327.152	285.092	307.833	316.532	328.764	402.13	282.29	328.577	298.577			144.682	119.428	126.915	137.192	132.844	122.835	134.902	164.749	172.823	172.038	192.061	130.84	136.606	140.475	151.722	169.937	136.434	143.545	128.86	148.241	181.067			178.716	132.307	159.16
1643.39	344.055	316.567	332.047	332.267	319.852	369.269	348.428	240.123	280.762	261.968	319.928	259.669	326.076	291.529	315.76	319.589	337.133	408.015	282.51	327.995	302.195			144.022	120.09	127.566	138.744	137.766	125.259	138.09	167.83	173.76	173.018	191.315	134.562	141.929	140.753	154.048	169.496	138.403	148.301	129.134	148.244	182.496			178.117	132.424	159.295
1645.94	338.93	321.352	335.044	333.186	325.29	375.896	355.942	241.33	282.778	266.233	321.412	262.77	324.001	295.849	322.453	320.799	349.723	412.605	285.619	325.065	306.873			142.725	119.076	130.659	138.853	138.555	126.397	140.668	169.207	173.109	176.634	193.991	137.444	144.864	141.102	152.723	172.112	140.957	149.564	128.929	150.092	182.591			179.433	135.371	161.512
1648.48	333.101	321.784	333.529	335.959	322.134	378.779	359.637	243.643	283.032	268.266	321.598	264.503	321.845	300.612	325.936	325.472	359.188	412.816	289.686	322.138	304.218			141.463	118.634	128.639	139.337	136.646	126.048	139.979	172.084	173.394	177.386	191.887	139.905	147.442	140.468	151.27	171.316	142.393	150.309	129.891	150.439	181.416			178.612	136.889	162.092
1651.03	330.737	324.351	334.271	337.177	321.971	382.837	360.722	244.064	285.565	272.993	322.992	264.852	321.823	305.162	326.484	328.804	367.75	418.56	291.946	320.389	309.395			143.865	118.396	129.197	138.997	136.849	126.351	141.687	172.861	173.417	177.608	190.172	141.27	148.206	139.042	151.615	172.614	143.201	151.615	129.114	150.027	182.556			178.218	138.624	164.529
1653.58	329.913	325.813	335.081	338.707	326.244	386.099	359.266	244.596	286.73	276.658	323.298	264.949	323.476	309.669	328.796	332.382	377.059	423.831	296.749	321.325	312.052			145.69	119.733	130.063	138.487	137.88	126.534	143.08	174.328	172.056	177.908	193.075	141.742	150.213	139.666	150.569	173.353	142.853	153.904	131.384	149.185	183.668			178.035	138.568	166.972
1656.12	329.082	330	336.629	344.575	327.065	390.936	358.788	245.993	285.013	277.313	322.378	264.595	323.928	314.815	331.831	339.616	380.762	431.484	299.12	322.542	316.682			147.354	121.22	131.285	138.01	136.783	127.965	144.502	176.433	173.325	180.563	193.873	142.025	148.717	138.413	150.787	175.712	143.646	155.462	132.638	148.231	186.198			178.092	138.632	166.021
1658.67	326.585	329.886	339.871	349.694	329.741	393.305	358.374	245.536	284.06	278.274	321.9	263.945	324.413	320.544	334.189	341.824	386.092	437.894	304.254	321.705	318.934			147.668	122.966	130.835	138.025	139.248	129.219	145.979	176.448	172.999	180.586	195.029	140.797	148.516	139.071	150.781	176.867	142.951	154.805	134.995	149.948	188.753			178.776	138.948	166.516
1661.21	321.459	329.492	339.466	350.544	332.899	396.953	358.228	242.69	286.987	277.307	322.828	262.473	324.026	322.094	332.482	344.392	388.001	443.844	309.053	321.042	319.666			147.356	124.152	132.248	139.029	137.421	129.687	144.167	174.802	171.661	180.903	197.915	139.099	148.876	141.302	152.067	179.019	141.498	152.231	135.53	152.704	189.817			178.295	137.116	168.656
1663.76	318.291	327.875	339.208	349.645	335.534	398.201	354.378	240.923	287.055	278.349	323.468	261.271	323.501	324.913	330.855	347.098	387.439	448.555	313.321	322.312	321.158			147.435	124.742	132.827	139.659	137.002	129.699	144.065	173.901	172.835	180.202	198.571	137.386	148.351	141.65	152.205	181.066	140.71	149.705	136.235	155.081	191.023			177.354	136.452	168.883
1666.31	317.878	326.285	338.754	348.704	336.699	399.159	349.345	240.646	287.602	277.76	323.114	258.293	322.034	327.047	329.406	348.231	385.625	448.914	314.992	321.949	320.603			145.514	123.793	132.085	139.535	137.983	128.829	143.442	172.573	173.725	178.847	196.148	135.861	147.205	140.57	151.839	181.758	140.622	149.947	137.525	154.336	191.36			176.167	136.904	168.991
1668.85	317.655	323.643	335.918	348.312	337.871	398.549	344.4	236.893	287.027	275.852	322.901	256.198	321.917	327.637	329.075	351.567	380.895	448.603	314.086	320.306	317.916			143.94	121.623	131.496	138.829	137.23	128.118	142.707	171.614	173.807	180.672	194.283	134.305	145.896	140.319	151.277	181.856	140.76	150.728	136.625	153.586	190.879			175.559	137.577	169.352
1671.4	315.394	320.965	334.38	342.872	336.319	394.866	336.678	231.529	284.909	272.589	321.566	252.685	320.14	322.48	328.784	352.271	375.826	443.867	312.253	318.386	317.02			143.952	121.055	130.967	138.165	135.936	126.623	143.239	169.29	172.152	181.108	193.828	132.819	144.151	139.654	151.53	179.486	140.421	150.947	134.251	152.421	189.129			173.312	137.482	169.2
1673.95	310.361	315.285	331.512	335.62	331.942	388.397	326.016	227.749	281.929	267.321	317.568	248.388	315.249	313.627	324.638	346.62	368.067	435.291	308.72	313.739	314.07			144.014	120.443	129.962	136.155	134.07	124.414	142.076	167.288	168.951	178.362	192.54	132.35	141.598	138.213	150.939	176.943	139.702	149.307	131.827	151.471	186.81			168.027	136.234	167.235
1676.49	304.833	308.321	325.423	329.211	326.582	379.591	315.188	223.584	276.517	262.09	310.256	244.774	312.211	302.198	316.549	335.616	357.262	427.433	301.432	308.196	309.055			142.965	118.471	128.7	133.644	131.485	121.979	139.058	164.689	166.121	175.165	190.241	130.599	138.159	136.109	148.046	175.026	138.169	145.422	130.622	149.509	182.76			163.856	135.416	166.143
1679.04	298.273	301.254	317.994	321.391	321.742	373.228	306.341	218.533	270.745	256.432	301.568	240.103	311.073	289.671	308.005	326.387	347.907	419.297	292.953	302.303	303.977			141.511	117.326	126.886	131.971	129.322	119.343	136.655	162.216	164.069	171.447	186.327	127.999	134.964	134.463	145.444	172.084	136.001	142.665	129.58	147.684	180.037			162.491	134.335	164.589
1681.59	291.349	294.225	311.285	314.81	318.888	367.165	298.925	213.118	267.678	251.202	295.8	234.869	307.341	279.351	301.245	322.991	339.756	407.999	286.761	296.126	300.16			140.462	117.342	125.829	130.757	127.854	118.298	135.071	161.162	162.038	168.444	183.532	125.829	133.056	133.776	145.433	169.399	134.225	141.355	128.381	147.268	178.786			160.549	132.036	161.362
1684.13	287.343	288.348	306.018	308.088	314.41	358.142	290.277	207.921	265.611	245.574	292.216	230.035	302.19	270.36	296.013	321.527	331.358	396.778	280.965	291.185	297.177			140.995	117.43	125.868	129.696	126.284	118.343	132.951	158.431	159.739	167.819	183.394	123.788	130.457	133.091	146.077	167.339	132.937	139.091	127.546	145.712	175.659			157.321	131.1	160.341
1686.68	282.98	281.009	298.636	297.951	307.331	348.447	280.635	203.532	261.741	237.813	285.906	224.829	296.592	261.864	290.071	312.246	321.728	385.643	273.088	285.999	290.058			141.02	117.154	124.758	128.724	124.788	116.138	129.997	155.615	158.129	165.49	181.975	121.603	126.193	132.382	145.548	164.955	131.042	136.617	125.718	144.584	173.396			155.218	130.579	158.696
1689.23	275.922	273.115	288.825	286.952	302.556	336.939	271.443	198.093	257.688	231.25	278.435	218.947	289.726	251.461	283.012	294.982	309.786	369.558	262.442	280.674	280.443			137.524	116.698	123.404	128.147	123.311	113.551	126.706	153.02	156.451	160.852	180.441	118.001	122.84	132.052	145.051	161.376	128.464	133.823	123.428	143.707	171.461			154.423	128.663	154.908
1691.77	270.115	264.7	278.679	276.76	297.827	326.444	261.121	191.031	253.685	224.482	272.088	213.86	284.754	239.446	276.293	283.979	298.335	352.565	250.833	275.869	272.953			134.072	116.035	122.417	127.178	119.674	112.296	123.183	148.186	152.972	158.505	179.485	114.506	119.866	131.539	144.002	156.804	126.56	130.267	121.068	141.486	168.322			151.505	127.512	152.578
1694.32	265.655	257.376	268.98	266.983	290.396	315.931	250.866	183.454	248.209	216.642	264.396	209.581	279.696	230.063	268.672	272.636	288.068	335.441	240.615	271.83	266.435			130.975	114.007	119.92	125.952	115.985	109.028	119.952	144.068	149.841	155.769	176.228	111.214	115.95	128.953	142.268	152.688	124.823	128.189	118.475	138.979	164.488			146.02	125.414	149.642
1696.87	260.887	251.6	263.486	256.322	284.246	304.183	242.541	177.431	244.876	210.677	259.104	205.782	274.648	223.591	262.687	260.542	277.972	319.171	228.958	267.75	258.223			129.512	111.713	117.264	124.284	115.211	107.001	117.535	142.061	147.904	152.82	171.65	109.69	113.585	127.159	141.369	148.52	123.593	127.249	115.939	135.274	159.672			143.511	123.947	146.432
1699.41	256.92	242.911	258.796	248.282	277.366	294.636	236.105	173.002	241.193	205.771	253.428	203.096	271.446	215.699	258.143	249.194	267.938	301.812	217.194	262.086	254.141			129.119	110.325	116.253	122.563	114.259	105.86	116.28	140.76	145.536	149.604	167.722	108.936	111.721	126.652	140.603	145.641	122.441	127.147	113.903	132.013	155.269			142.2	123.317	144.244
1701.96	251.865	235.151	250.698	240.367	269.995	283.633	229.96	169.21	237.162	199.018	246.738	200.128	268.013	206.107	251.824	234.04	256.518	285.58	205.235	254.952	247.848			125.608	108.648	114.621	123.324	114.988	105.46	114.133	138.993	143.241	146.223	165.343	108.102	109.977	126.905	138.518	141.701	121.652	124.64	110.213	130.465	152.37			140.525	121.234	140.777
1704.51	247.883	230.389	245.086	234.527	264.368	275.356	224.464	165.485	233.875	194.204	242.782	199.206	266.287	200.155	247.535	222.305	247.54	274.159	197.148	251.553	242.469			124.833	109.173	114.391	122.122	113.987	105.13	113.155	136.9	141.715	143.918	164.55	108.089	108.471	125.672	137.303	138.631	122.038	123.424	109.422	129.267	150.14			139.603	121.287	138.786
1707.05	245.075	224.835	240.541	229.795	259.657	270.759	223.111	161.935	232.668	191.088	237.434	197.141	264.49	193.033	243.207	217.78	240.542	264.605	189.182	249.14	239.285			124.863	110.014	114.278	121.659	111.916	103.946	112.591	135.613	139.907	141.799	165.235	106.804	107.299	125.368	136.292	136.303	121.046	123.406	109.088	128.398	149.686			137.682	121.373	137.866
1709.6	244.324	222.001	236.538	225.021	254.847	266.192	219.31	159.998	230.327	188.086	235.92	196.363	262.479	188.849	240.98	209.061	232.187	256.312	183.587	247.402	236.755			123.645	109.773	115.409	121.844	112.865	104.455	113.792	137.071	139.462	140.996	166.186	107.933	108.134	125.416	136.729	136.225	121.414	123.61	107.603	128.003	146.687			136.069	121.845	137.017
1712.14	240.611	217.243	234.039	223.108	252.382	261.936	218.686	160.221	230.323	185.426	234.255	193.978	260.353	185.805	240.147	200.786	230.022	249.63	180.106	244.671	233.175			124.562	109.653	116.448	122.258	112.766	104.879	111.853	135.694	139.978	140.81	166.713	107.587	107.239	125.068	138.022	135.129	119.624	124.304	105.981	127.539	146.052			135.563	120.306	135.942
1714.69	241.733	216.339	234.172	221.175	251.488	259.656	218.756	160.38	229.102	184.372	233.028	193.674	259.556	184.553	239.215	202.232	225.943	245.449	175.694	244.181	232.178			125.017	110.151	114.737	122.889	113.7	104.162	111.275	136.614	139.874	139.74	164.245	106.691	107.402	127.249	137.658	133.197	118.373	123.196	107.455	129.468	146.011			137.637	118.782	136.041
1717.24	239.953	217.985	233.559	219.713	249.937	259.022	216.786	159.116	228.993	184.261	230.874	192.614	258.46	182.849	237.98	200.458	223.905	242.063	174.623	247.103	230.811			124.348	112.029	115.104	123.963	113.582	103.588	111.584	137.344	139.469	139.139	164.896	106.936	106.001	128.015	137.969	135.376	120.262	121.25	108.085	128.543	146.2			137.185	120.175	135.284
1719.78	236.479	214.058	227.207	217.648	247.72	258.495	213.233	156.673	225.599	182.518	230.746	194.214	259.281	180.803	237.22	193.864	222.349	240.832	174.071	245.552	228.619			122.676	109.757	115.209	123.939	109.999	102.577	108.904	131.582	139.13	140.039	166.172	105.361	104.233	128.596	138.397	134.467	118.271	118.843	106.667	127.182	144.852			135.173	119.621	134.893
1722.33	235.476	213.002	230.062	216.699	249.816	255.998	211.984	159.018	223.515	182.164	230.268	192.74	257.246	178.953	232.71	191.739	218.397	238.441	171.501	245.998	228.523			121.068	108.583	113.247	122.516	111.498	102.598	109.606	132.048	139.879	137.162	162.991	104.171	103.925	126.664	136.466	131.542	116.525	116.774	104.714	125.796	143.062			136.589	119.658	133.636
1724.88	237.437	211.666	230.731	217.175	248.185	255.893	212.334	155.201	226.368	182.563	228.451	195.253	258.955	178.2	234.097	195.36	216.598	237.495	171.299	245.264	229.19			121.538	106.979	113.057	122.589	112.923	102.108	108.621	132.319	138.218	138.655	163.283	105.041	103.759	124.922	136.798	133.743	118.091	118.165	104.518	127.282	142.398			134.007	119.705	132.054
1727.42	237.441	213.966	230.199	215.028	248.327	254.541	211.982	156.578	223.792	182.759	228.665	194.527	257.602	176.084	233.25	189.199	215.905	235.315	169.618	244.645	228.903			120.63	107.131	112.034	124.402	114.8	103.459	109.103	132.669	137.458	136.198	164.584	105.684	105.293	125.565	136.341	133.196	118.665	118.898	104.632	125.335	143.715			135.495	119.611	134.403
1729.97	236.236	212.643	229.329	214.191	248.812	253.568	211.865	155.984	224.881	180.187	230.45	194.862	259.539	175.499	234.72	187.706	214.408	232.785	169.35	248.526	232.325			121.754	108.14	111.664	122.785	114.279	104.351	110.223	132.794	138.565	136.34	166.135	105.703	106.938	127.518	137.284	130.795	117.876	120.721	105.753	127.805	143.429			132.782	121.426	135.04
1732.52	235.637	211.74	227.706	215.048	249.581	255.761	214.225	157.224	227.608	180.549	227.137	195.17	259.382	174.447	232.564	190.986	213.165	233.419	167.566	245.43	231.244			123.415	109.529	114.984	123.098	112.371	102.538	110.711	135.213	139.003	139.475	165.815	105.895	105.048	126.565	136.927	131.706	119.137	119.674	106.387	127.672	144.134			134.204	121.818	136.61
1735.06	236.366	209.342	231.452	217.358	248.577	255.057	213.215	156.938	228.344	181.419	228.155	194.352	258.574	177.285	234.394	192.813	211.685	233.375	167.259	247.076	229.304			123.273	111.485	115.199	124.79	115.981	106.367	112.276	138.801	139.644	139.121	165.95	108.069	108.388	126.895	138.959	133.26	118.384	122.007	107.733	126.573	145.848			137.237	119.644	134.409
1737.61	237.699	210.503	231.391	216.18	249.229	256.638	211.986	155.898	227.562	182.221	228.676	193.845	258.102	175.544	231.519	193.419	215.764	234.448	169.353	245.129	229.883			125.182	110.256	117.772	121.824	115.035	106.261	112.579	135.05	137.271	139.301	171.791	106.208	105.907	128.286	137.953	135.105	118.517	122.241	109.033	131.11	148.437			135.033	122.318	134.975
1740.16	235.364	211.38	226.892	214.611	250.208	254.494	211.092	156.71	227.469	180.752	228.678	191.97	256.895	175.289	233.854	193.699	214.447	234.377	168.637	245.651	230.634			124.273	111.519	115.157	123.001	111.139	102.935	108.641	132.306	138.801	139.217	170.289	104.708	103.749	128.354	139.048	135.08	116.413	119.762	106.839	129.336	145.183			133.884	120.221	137.4
1742.7	235.675	212.039	229.12	215.941	247.941	253.937	212.177	157.351	225.168	182.461	225.873	192.855	256.552	176.094	233.84	189.991	212.866	231.947	168.654	247.873	228.531			124.277	111.315	114.314	124.074	112.102	106.163	108.605	132.102	139.258	137.067	165.099	105.783	103.563	128.034	139.521	135.039	116.804	119.229	106.019	130.096	145.617			134.56	119.971	134.637
1745.25	235.005	212.086	226.734	216.138	249.375	253.608	212.643	154.835	225.022	181.552	227.946	191.706	258.002	174.823	232.46	198.12	213.169	234.534	171.187	253.447	229.834			124.399	108.921	114.137	122.974	112.997	103.868	109.167	133.01	137.339	139.961	166.81	104.885	103.45	127.965	138.852	133.58	117.153	123.092	108.205	127.702	146.224			133.439	121.231	133.987
1747.8	238.731	209.927	226.684	214.27	249.993	252.205	209.531	156.705	224.284	178.622	227.585	192.021	259.178	175.014	232.775	191.987	212.26	232.788	168.932	262.458	230.51			123.239	107.948	114.574	121.623	110.295	102.181	108.461	132.629	139.17	138.483	164.909	104.333	104.07	127.341	139.301	132.833	118.848	123.434	107.284	128.119	143.588			132.937	119.74	134.314
1750.34	234.177	208.989	226.526	214.02	249.779	252.509	205.855	154.427	221.168	179.202	227.363	192.472	258.176	173.362	230.727	185.304	211.084	233.55	166.896	264.582	228.043			120.348	106.719	112.979	122.331	110.32	103.027	108.409	132.651	139.085	134.794	161.81	104.264	104.03	126.17	138.071	131.338	116.349	119.46	104.009	126.766	143.087			132.38	119.221	132.855
1752.89	231.958	208.739	224.991	213.199	246.333	251.465	206.468	151.713	221.879	178.727	225.645	192.59	255.964	170.837	229.642	185.55	207.878	230.745	165.423	260.835	227.16			119.77	106.54	111.958	120.843	111.665	101.245	108.659	131.202	138.764	135.404	159.88	103.544	103.449	125.709	136.694	130.716	116.571	118.123	104.201	124.816	143.01			131.714	119.22	131.932
1755.44	233.016	206.104	225.386	210.391	247.488	248.925	205.171	151.817	222.596	177.249	224.379	191.363	257.115	170.983	227.282	186.281	207.054	230.521	164.666	249.839	226.63			121.403	106.992	110.826	120.025	110.893	100.233	108.596	131.343	136.579	134.237	159.512	104.234	102.847	123.969	135.931	131.286	115.748	119.032	102.927	124.219	141.478			129.703	120.082	133.84
1757.98	230.161	206.733	226.581	211.146	248.428	250.729	205.669	152.195	221.684	176.485	224.319	191.919	256.814	169.336	228.474	185.139	207.1	229.435	165.032	244.801	227.631			120.346	108.091	111.652	119.665	110.44	101.433	110.02	133.59	136.67	135.058	159.991	105.519	102.187	124.379	134.693	130.648	116.023	119.065	103.845	126.032	140.9			129.706	120.721	134.087
1760.53	227.749	205.62	226.873	212.333	245.812	250.751	204.243	153.977	220.003	175.839	221.454	191.777	256.814	167.935	227.282	187.445	206.399	227.774	165.295	239.443	226.726			123.201	108.791	111.962	121.609	112.449	103.109	109.929	133.728	136.58	136.515	162.159	105.244	103.757	125.433	136.711	130.333	117.709	120.195	105.251	126.254	142.906			129.162	119.741	132.909
1763.08	228.164	205.444	225.318	211.159	245.331	249.453	205.306	153.946	219.763	176.424	221.694	192.501	255.433	168.92	227.023	185.302	205.948	228.907	164.125	236.926	226.194			123.927	106.813	114.35	121.496	110.093	102.098	108.39	131.82	135.435	135.518	164.723	104.655	102.969	125.08	136.224	130.491	116.866	119.282	105.183	126.926	141.943			129.839	119.487	132.676
1765.62	226.933	204.996	228.32	211.245	243.34	247.74	205.845	155.642	220.88	176.173	222.156	190.12	254.218	168.857	226.537	183.809	206.259	229.122	165.876	233.659	225.252			124.726	109.571	112.395	122.151	110.545	102.272	108.787	133.171	136.849	133.381	162.594	104.4	103.067	125.131	135.832	130.685	115.19	118.438	105.019	126.723	141.844			132.778	117.812	132.38
1768.17	228.514	205.463	226.268	211.811	244.856	250.901	205.012	154.813	219.302	175.097	222.364	187.63	254.748	168.067	228.756	185.8	207.963	230.14	166.769	233.728	226.522			124.063	109.475	114.6	122.768	110.595	102.518	108.582	131.702	136.748	136.947	168.018	102.89	102.692	126.435	138.728	132.954	115.518	119.095	105.85	127.628	143.147			131.153	118.763	132.789
1770.71	226.924	203.858	225.106	209.587	244.109	247.463	202.077	150.873	217.746	174.056	221.549	187.668	254.334	168.661	227.069	183.206	205.64	228.773	164.85	233.122	225.524			122.36	107.391	112.777	121.925	109.429	101.876	106.667	129.688	136.864	136.262	163.903	102.191	101.373	126.182	137.201	132.187	115.659	117.442	104.055	125.907	141.882			130.657	118.701	133.08
1773.26	226.767	204.048	222.757	208.276	243.074	246.105	202.074	150.338	220.032	175.278	219.886	186.654	250.86	168.331	226.647	183.853	204.648	228.891	163.464	232.334	223.7			120.98	107.225	110.64	121.326	109.56	99.7336	106.794	128.777	136.269	134.905	159.737	101.641	100.603	124.03	135.899	130.892	115.131	116.842	103.658	125.271	141.081			129.963	117.495	131.848
1775.81	226.6	202.68	221.477	207.186	243.337	245.603	201.088	150.339	218.572	175.396	220.777	187.168	251.014	167.973	226.486	185.91	205.578	227.682	163.037	233.564	223.308			119.89	107.01	111.054	119.62	109.307	100.389	106.255	128.952	136.159	134.137	159.997	101.922	101.067	124.32	136.57	131.431	115.3	116.38	103.466	125	141.734			129.938	117.691	131.455
1778.35	227.248	202.729	220.564	208.546	242.632	243.44	200.385	149.308	217.913	175.118	220.106	187.911	251.049	165.874	224.372	183.14	203.65	226.065	163.054	233.274	222.393			119.838	106.182	109.826	119.5	108.647	99.6701	107.018	128.264	136.197	132.215	158.041	103.032	101.608	123.491	134.956	130.599	115.178	116.602	103.002	123.512	140.959			129.391	117.989	131.216
1780.9	227.034	203.607	222.142	209.166	243.566	244.907	201.006	149.364	218.874	174.104	219.461	188.146	251.694	165.664	225.281	185.855	203.22	225.546	161.782	232.237	224.51			120.461	105.838	110.036	119.282	110.154	99.8301	106.565	129.394	136.566	132.613	156.94	103.988	102.313	122.845	135.359	129.074	115.898	117.6	102.983	124.309	141.026			129.422	117.998	131.269
1783.45	226.301	201.786	222.854	208.268	243.46	244.122	201.964	150.653	218.676	173.011	219.43	187.827	252.835	166.197	224.12	187.134	202.92	224.804	162.473	231.018	225.276			120.346	105.807	110.107	118.419	109.994	100.614	106.786	129.396	135.776	134.938	157.792	104.433	101.444	123.406	135.786	129.128	116.082	118.77	103.622	123.928	140.348			130.27	118.797	131.338
1785.99	225.933	201.226	221.419	206.629	241.273	244.125	201.805	150.754	218.82	170.866	219.057	187.395	252.68	164.79	223.221	183.089	202.545	224.258	161.699	229.725	224.202			120.121	106.29	109.481	118.722	110.392	99.6059	108.007	130.85	135.785	133.474	157.268	104.332	100.949	124.608	136.068	129.308	114.624	119.803	103.222	123.227	140.029			129.313	117.455	131.019
1788.54	225.259	201.368	220.619	206.054	239.886	244.324	200.678	150.201	218.001	172.054	218.721	188.308	251.184	164.472	222.734	180.95	201.948	224.415	160.689	230.326	223.174			120.287	107.631	110.012	119.615	111.955	101.431	109.412	132.444	134.767	132.159	159.369	103.715	101.498	123.912	136.286	129.073	113.96	119.263	103.202	124.1	141.249			128.908	117.959	131.064
1791.09	225.025	200.047	220.719	206.315	240.755	244.099	199.512	149.853	218.547	172.531	217.849	188.135	251.225	165.45	221.818	180.609	201.715	223.896	160.044	229.917	223.019			120.973	108.235	112.019	119.623	111.858	101.963	108.448	131.906	134	132.961	163.331	103.088	103.028	123.329	135.081	128.704	114.006	118.03	102.904	124.182	141.046			128.532	118.656	131.012
1793.63	225.063	198.001	220.046	205.816	241.02	243.782	199.378	149.182	218.078	171.14	218.979	187.761	249.857	164.548	221.668	183.305	201.943	222.394	160.451	229.923	222.123			120.467	107.099	112.513	119.854	109.567	100.853	106.819	128.709	134.196	133.092	163.519	101.689	101.604	124.14	134.021	128.312	113.086	116.224	103.088	123.334	140.868			128.518	118.237	131.441
1796.18	225.789	200.075	221.193	206.911	241.754	243.915	199.45	148.647	219.081	170.287	218.716	186.995	250.174	165.055	223.253	185.485	201.267	223.007	161.895	230.213	222.751			120.865	107.984	110.634	120.316	109.459	100.923	106.212	129.482	134.466	132.789	160.702	102.789	101.329	124.745	132.951	128.738	113.693	117.496	104.139	123.629	140.365			129.665	117.864	130.463
1798.73	226.462	200.808	221.187	207.48	241.108	244.664	198.752	149.233	217.98	171.336	218.601	186.449	250.521	165.136	221.504	186.104	201.115	224.461	162.76	229.716	224.017			120.206	107.457	111.694	120.589	108.3	100.978	105.077	129.195	135.696	134.164	161.863	102.503	101.089	124.895	134.122	129.51	113.95	117.714	104.139	123.219	140.301			129.631	117.256	130.668
1801.27	227.826	199.257	219.994	206.592	242.627	243.901	199.233	149.808	217.568	172.538	218.695	186.228	249.726	164.504	221.553	183.457	201.028	223.34	161.768	230.131	223.624			120.007	107.165	111.167	121.01	108.417	100.32	105.562	128.496	135.892	133.813	160.727	101.979	101.136	124.999	134.129	129.483	113.952	116.555	103.185	123.72	140.661			129.997	116.718	130.75
1803.82	225.854	199.602	219.01	207.308	242.629	243.504	198.609	149.392	218.348	172.569	218.467	187.336	251.928	164.063	222.83	180.972	199.556	222.281	161.34	231.353	223.354			119.725	107.247	109.361	121.384	109.719	100.443	106.482	129.901	135.097	132.615	159.739	101.908	101.046	124.418	134.871	129.564	115.124	116.529	102.498	123.556	139.687			128.613	117.05	130.136
1806.37	224.385	198.692	217.679	207.564	242.223	242.923	198.711	147.975	218.601	173.342	218.67	187.595	251.58	164.511	220.886	179.44	199.825	222.828	159.905	232.244	222.804			118.932	106.286	109.161	120.075	108.928	100.516	106.268	128.811	134.601	132.613	159.218	102.054	100.498	124.372	135.156	128.819	114.801	116.515	102.534	123.772	139.416			126.769	117.982	130.068
1808.91	225.655	201.265	219.357	206.841	242.135	241.126	199.315	147.861	219.166	172.203	219.117	187.45	251.586	163.768	219.958	177.153	199.554	223.43	159.7	231.36	222.973			118.683	105.926	108.7	118.995	107.686	99.7749	105.326	127.775	134.758	131.57	157.859	101.682	100.423	124.096	134.304	128.256	114.109	115.376	101.996	123.248	139.922			126.746	117.781	130.45
1811.46	225.403	201.507	220.07	205.5	240.556	241.089	198.455	147.661	219.861	172.391	218.395	188.707	252.856	162.904	220.353	174.767	199.471	223.818	159.468	230.204	221.428			117.952	106.979	107.845	118.88	107.231	98.9955	105.983	129.033	135.177	130.066	155.561	101.629	100.326	123.309	133.818	128.181	114.542	115.148	100.885	121.932	138.939			126.927	116.219	130.518
1814.01	224.626	200.347	219.862	205.684	241.039	243.868	198.623	149.103	221.319	173.275	218.137	189.038	254.204	162.891	222.489	177.448	199.992	223.401	159.763	231.628	222.071			119.282	108.045	108.481	118.635	107.719	98.4108	107.71	129.755	135.329	131.27	156.435	101.758	100.699	123.846	134.03	129.206	114.86	116.428	101.105	121.57	139.132			127.566	116.136	130.049
1816.55	224.469	201.001	220.398	207.014	242.896	242.712	199.329	150.547	221.132	172.009	218.636	188.307	253.956	163.427	223.215	181.782	201.363	222.951	160.833	231.539	223.491			120.861	107.222	109.426	117.968	108.18	98.9526	107.077	129.641	135.243	132.48	158.108	101.916	100.725	123.914	134.634	128.856	114.122	116.242	101.853	122.512	139.967			129.623	116.779	129.869
1819.1	225.786	201.912	220.175	208.841	242.36	242.404	200.839	149.684	219.634	172.885	219.505	188.98	253.379	164.638	222.717	179.732	201.225	223.039	161.683	233.132	222.488			120.295	107.106	110.774	118.503	108.559	99.5438	106.48	128.785	135.164	133.093	158.759	101.564	100.548	123.261	134.415	128.901	113.287	114.981	102.572	123.84	141.283			130.281	116.923	129.527
1821.65	225.876	201.84	220.419	209.766	242.068	244.665	199.424	150.177	219.036	173.594	220.51	190.295	254.731	164.403	223.715	180.545	202.522	222.358	161.992	235.217	223.708			120.291	107.469	111.52	120.623	109.557	100.202	107.069	129.072	136.374	133.738	159.6	101.503	101.426	124.102	135.479	130.616	114.069	115.429	103.956	123.863	142.161			129.453	117.609	130.27
1824.19	226.642	201.575	221.717	208.44	243.041	245.246	199.606	151.006	220.357	173.518	221.894	190.688	254.728	165.049	224.803	182.914	202.711	222.665	162.79	234.261	225.503			120.061	107.637	112.352	121.672	109.964	100.849	107.188	129.824	137.521	134.882	161.32	101.761	101.451	125.299	136.789	131.137	114.327	116.912	103.769	123.977	141.509			129.975	118.689	131.499
1826.74	227.696	202.974	225.474	208.459	243.506	247.319	202.003	151.085	221.883	174.514	221.352	190.553	254.246	165.493	226.655	185.223	204	224.243	163.387	234.267	227.554			120.388	107.038	112.191	121.364	110.032	101.457	107.265	129.601	138.252	134.313	160.703	102.754	101.769	125.632	137.183	131.465	114.834	118.23	103.065	124.246	142.138			131.379	118.872	131.732
1829.29	227.94	204.133	227.341	209.713	243.868	248.549	201.956	152.035	223.334	175.739	221.693	191.189	255.951	165.054	227.055	187.265	205.31	224.876	162.927	234.478	228.066			122.134	106.704	110.909	122.305	110.25	102.101	107.673	130.513	139.211	133.235	160.013	103.66	102.668	126.042	136.298	131.817	115.82	118.689	103.212	123.787	141.252			131.373	117.887	132.216
1831.83	228.928	204.458	224.577	210.383	244.043	247.875	201.018	151.451	223.227	175.699	223.342	192.213	258.241	165.239	225.806	182.175	204.125	226.275	163.368	235.574	228.217			121.427	107.578	111.253	122.77	110.533	102.195	108.153	131.657	138.8	133.787	160.517	103.459	102.473	125.899	135.57	131.245	115.976	117.758	103.043	124.492	140.794			130.616	117.208	132.267
1834.38	229.508	204.968	225.367	211.577	244.881	248.583	202.164	150.373	223.176	176.425	223.826	193.235	260.223	165.863	226.482	178.676	204.324	228.008	163.448	235.728	227.233			120.596	107.714	111.824	122.353	111.96	102.811	109.195	131.583	137.648	133.963	161.982	103.71	102.248	125.54	136.823	129.869	115.831	117.727	103.361	125.06	141.925			130.46	117.545	132.231
1836.92	229.065	205.726	227.328	211.473	245.446	250.667	203.429	150.669	225.49	177.421	223.966	193.359	259.058	166.738	227.591	181.525	205.074	228.011	163.212	236.551	225.986			121.926	107.934	112.103	122.218	111.485	101.86	109.455	131.133	137.479	134.252	164.866	103.927	102.29	125.843	137.646	130.476	116.08	118.482	104.577	125.632	142.915			130.713	118.899	132.577
1839.47	230.021	205.482	225.173	210.053	246.674	250.798	203.128	150.121	226.876	175.992	224.028	192.878	257.86	167.381	226.385	182.756	206.077	228.027	163.127	238.55	227.895			121.976	108.36	111.925	122.043	110.055	100.402	109.004	130.81	137.903	133.547	164.255	103.454	101.966	125.58	137.491	131.25	115.878	117.363	105.045	125.86	143.877			130.48	119.203	133.553
1842.02	230.771	204.939	225.416	211.193	247.046	249.054	203.729	150.513	225.548	175.024	223.79	192.514	258.597	167.32	226.49	182.08	205.599	227.144	163.768	238.918	229.008			121.805	108.603	111.497	121.791	110.851	100.974	108.644	130.292	139.034	132.687	162.029	103.578	101.556	125.383	137.348	131.123	115.326	116.674	104.587	125.237	143.715			130.247	118.147	133.458
1844.56	228.959	205.026	224.233	212.901	246.083	249.38	204.247	151.14	224.032	175.505	222.663	192.972	259.986	167.41	227.71	181.442	205.086	227.627	165.069	239.13	229.52			122.118	108.804	111.429	122.387	110.208	101.863	108.18	130.445	139.635	133.015	161.227	103.423	101.567	125.883	136.858	131.208	115.39	116.422	103.661	125.048	143.498			130.712	119.675	132.419
1847.11	227.999	205.909	222.96	212.786	247.61	250.75	205.052	150.894	224.087	176.733	223.31	193.233	262.186	167.722	228.457	180.706	205.869	229.704	166.392	240.075	229.905			122.423	108.763	111.517	123.104	109.225	101.951	108.205	131.129	139.801	133.416	160.938	103.092	102.01	127.881	136.946	131.515	115.708	116.782	104.227	126.04	143.335			130.696	120.158	133.026
1849.66	229.849	207.471	226.443	212.82	249.365	251.985	205.058	152.128	226.265	176.894	226.027	193.214	262.191	167.618	229.651	181.965	206.702	231.017	167.061	240.962	229.991			123.129	109.084	111.92	123.984	110.238	101.945	108.397	131.088	139.873	134.167	161.574	103.204	101.997	128.533	138.518	132.745	116.221	118.233	105.456	126.473	143.534			131.242	119.001	132.735
1852.2	232.086	208.027	229.672	213.748	250.249	252.704	205.21	153.89	228.308	176.555	227.993	193.564	261.653	168.7	229.751	182.759	207.121	232.274	166.224	240.523	230.168			123.891	110.11	112.617	124.744	111.113	102.756	108.124	132.699	140.581	135.033	162.699	103.826	101.939	127.758	139.173	133.26	117.159	119.163	105.454	126.538	144.508			132.127	119.431	132.885
1854.75	232.003	208.474	230.005	214.762	251.872	252.883	205.655	154.645	228.122	177.327	228.851	194.114	262.176	170.459	230.096	182.612	207.459	232.414	166.216	242.396	231.011			123.898	110.179	113.535	124.358	111.683	103.56	107.884	133.622	141.319	136.459	164.275	105.433	102.323	128.39	139.713	133.528	118.499	118.544	105.516	127.474	145.454			132.476	120.204	133.993
1857.3	231.798	208.55	228.292	216.011	253.904	253.905	204.861	153.962	228.42	178.202	228.443	195.609	263.735	169.636	230.843	182.952	207.929	232.101	166.56	243.722	233.353			123.106	108.974	113.501	124.125	111.937	103.664	108.78	132.091	140.689	136.179	164.18	105.653	102.108	128.548	140.04	133.24	118.269	117.642	105.532	127.045	144.698			131.942	121.347	134.395
1859.84	232.17	208.446	229.563	216.06	252.967	254.297	205.738	153.313	228.86	180.025	229.029	196.776	264.258	168.533	232.118	183.719	208.397	232.276	166.511	243.74	234.629			123.8	109.168	113.108	124.131	112.378	103.279	110.01	132.103	140.336	135.565	163.696	105.281	102.199	128.436	139.351	132.94	117.87	118.377	105.875	127.805	144.826			131.456	122.076	134.504
1862.39	232.46	208.399	230.358	215.334	251.927	253.975	206.453	153.793	229.292	180.292	229.405	197.292	264.018	168.639	231.08	184.577	208.023	232.63	166.873	244.783	234.126			123.189	110.08	112.431	124.722	112.899	103.352	110.044	133.185	139.464	135.984	164.427	105.469	102.791	127.991	139.937	132.892	118.477	119.051	105.536	127.245	145.389			131.954	122.141	135.237
1864.94	232.788	208.438	228.88	215.47	251.708	255.011	206.405	153.827	228.856	178.11	227.709	197.087	264.296	168.054	229.797	182.812	207.212	232.77	166.728	244.881	232.928			121.845	109.511	112.456	124.327	112.488	103.852	109.838	132.817	140.275	135.095	164.166	105.287	103.67	127.789	139.485	132.538	118.257	119.246	104.841	127.211	145.064			131.57	122.142	136.067
1867.48	233.456	209.224	227.944	215.733	250.044	255.679	207.229	153.414	228.693	178.103	227.408	196.359	264.577	168.291	231.411	181.855	208.124	232.941	165.643	244.844	232.538			122.733	109.024	112.927	123.411	111.938	103.345	110.3	132.79	140.765	135.702	165.022	105.285	103.866	128.446	138.987	132.749	118.121	119.187	105.372	128.643	145.69			131.927	122.463	135.164
1870.03	234.183	208.475	227.847	216.731	251.841	254.967	208.148	153.202	229.271	179.039	228.219	194.679	265.413	168.703	231.605	182.245	208.31	233.449	165.8	245.684	232.743			124.121	110.1	112.573	124.292	112.038	102.311	110.064	133.659	140.446	136.994	164.615	105.315	103.417	129.295	139.699	133.245	118.355	119.281	105.684	127.901	145.376			132.217	121.878	134.66
1872.58	234.789	208.488	226.816	217.594	253.413	255.293	207.921	153.287	230.025	178.797	227.856	195.327	264.437	169.769	231.893	181.627	208.477	233.544	167.021	247.212	233.847			124.759	111.278	113.293	125.943	112.455	103.264	110.16	133.566	141.538	136.79	164.337	105.378	102.857	128.98	139.341	133.346	118.158	118.657	105.669	128.492	145.443			132.255	121.529	134.636
1875.12	235.374	211.479	228.711	218.133	252.469	256.516	207.999	155.574	230.99	179.888	228.46	196.684	263.768	171.405	232.703	182.74	210.77	233.56	168.777	247.318	234.971			124.305	111.173	114.51	126.854	112.863	105.057	111.143	134.298	141.533	137.199	166.162	105.809	103.252	129.483	139.597	134.999	118.582	119.514	106.625	128.698	146.326			133.76	121.612	135.206
1877.67	235.118	211.853	231.318	216.43	252.493	256.28	208.632	156.027	229.12	179.607	229.707	196.701	264.2	171.265	232.615	184.62	211.845	233.911	168.655	246.423	233.756			123.481	110.693	115.324	126.776	113	104.815	111.35	134.524	141.442	138.666	167.828	106.446	103.727	130.381	140.813	135.841	118.13	120.002	106.774	128.431	147.077			133.534	122.077	135.625
1880.22	235.365	210.174	229.654	215.499	252.965	255.886	206.92	154.014	229.441	179.14	229.739	196.286	264.136	169.625	231.978	185.331	209.591	232.893	166.805	246.598	233.114			123.241	111.142	115.345	126.177	113.374	104.447	110.527	134.051	141.611	138.321	168.378	106.311	102.747	129.846	141.005	133.751	117.606	118.836	106.068	129.146	146.471			133.218	122.549	135.74
1882.76	235.902	210.891	230.179	216.059	253.89	256.871	206.791	153.936	232.963	180.953	229.606	195.478	265.117	169.295	232.306	185.213	208.333	233.049	167.101	247.131	233.108			124.085	111.428	115.14	125.694	114.308	104.721	110.838	134.962	141.788	137.583	168.033	106.233	103.7	129.846	140.721	133.34	118.316	118.929	105.857	129.505	145.745			135.302	122.115	135.77
1885.31	234.817	210.212	231.103	216.233	254.588	256.687	208.639	153.242	234.061	180.15	228.902	196.129	265.204	169.748	233.534	187.844	208.557	234.281	167.693	246.778	234.119			123.758	110.634	114.934	125.224	114.043	104.616	111.224	134.706	141.155	138.15	168.56	105.525	104.475	129.298	140.362	134.364	118.624	120.848	106.239	129.429	146.207			134.928	122.939	136.332
1887.86	235.106	209.497	231.661	216.205	254.144	256.051	208.967	153.851	233.128	179.593	228.99	196.68	263.561	170.721	234.176	188.933	208.929	234.167	167.559	247.366	234.632			123.33	109.725	114.743	125.75	114.064	104.366	110.601	133.73	141.289	138.721	168.178	104.863	104.769	128.76	140.565	134.495	119.154	122.073	107.205	129.632	146.465			133.595	123.628	136.868
1890.4	235.71	210.178	230.723	215.925	252.455	254.392	208.392	155.075	231.518	179.899	228.514	196.874	263.929	169.091	233.129	187.921	209.643	231.696	168.235	247.031	234.449			123.535	109.848	114.126	125.553	113.604	103.582	109.807	134.021	141.661	139.298	166.261	105.414	104.3	128.402	140.3	135.077	119.938	121.781	106.975	129.202	146.455			133.528	122.495	136.06
1892.95	234.919	210.318	229.53	217.176	252.259	253.499	208.931	155.7	231.304	179.248	228.733	196.39	265.983	168.025	232.331	187.735	208.891	230.682	168.03	245.394	234.617			123.829	110.586	113.455	125.83	112.839	104.702	110.008	134.515	141.69	137.935	164.579	105.714	103.975	129.08	140.171	135.83	120.445	121.468	105.67	128.524	146.132			133.063	121.81	136.084
1895.49	234.19	209.847	229.343	216.281	254.13	255.279	209.955	156.994	231.108	179.051	228.647	196.161	265.984	168.405	232.321	185.172	207.809	231.777	166.593	246.013	234			124.675	111.009	113.816	124.946	112.075	105.501	110.379	134.156	142.189	137.019	164.562	106.195	104.41	130.473	141.166	135.869	119.246	120.63	106.563	128.745	146.272			132.764	121.341	135.532
1898.04	232.596	209.519	229.431	215.01	254.149	255.865	209.895	156.913	231.398	179.356	228.664	195.818	264.829	168.724	231.499	184.182	208.158	231.871	166.647	248.175	234.123			125.245	111.065	114.208	124.574	110.826	103.66	110.203	133.009	142.591	137.541	165.311	105.811	103.447	130.755	141.828	136.342	118.014	120.151	107.477	129.441	146.601			133.197	121.762	134.982
1900.59	232.917	209.017	230.815	215.331	252.404	254.783	209.126	156.62	232.243	180.433	228.31	195.841	264.681	169.921	231.987	183.632	208.876	232.514	166.771	247.813	234.828			124.697	111.291	114.582	125.052	112.269	103.529	110.52	134.05	142.749	136.937	165.581	105.711	102.955	131.391	142.677	136.75	118.199	119.891	107.233	128.743	147.041			134.84	121.165	135.869
1903.13	232.889	208.453	231.998	216.598	251.939	254.057	207.661	155.611	233.319	181.227	228.458	196.233	264.793	170.396	232.569	183.463	209.624	233.987	166.947	247.903	233.48			124.11	111.804	114.814	125.477	114.31	103.847	111.484	135.016	142.091	136.975	165.351	106.286	104.178	130.844	142.285	136.918	119.58	120.425	107.559	128.746	148.146			135.747	120.475	135.452
1905.68	231.947	208.38	230.929	217.833	251.924	255.552	206.905	154.523	235.155	181.708	229.114	195.634	263.866	171.01	233.149	182.984	210.244	232.838	167.142	247.645	232.683			124.227	111.182	115.61	125.737	113.912	103.902	111.263	133.675	141.593	137.886	167.824	106.65	104.788	130.11	141.649	135.821	119.107	119.92	107.576	128.918	147.481			133.473	120.956	135.609
1908.23	232.711	208.549	228.458	216.25	251.972	256.637	206.539	154.17	233.811	180.456	228.562	195.55	263.333	171.794	233.245	184.944	210.31	232.568	167.273	246.773	232.907			123.789	110.148	115.785	125.386	112.239	103.207	110.06	132.129	139.865	138.577	169.105	105.945	103.317	129.941	142.128	134.844	117.547	118.035	106.689	128.222	145.818			131.7	122.274	137.015
1910.77	233.979	208.765	227.881	214.112	253.671	255.28	206.321	153.333	231.599	179.713	227.581	195.899	263.961	170.443	231.894	184.927	209.399	232.045	166.509	246.966	233.269			123.455	109.547	113.618	125.076	110.908	101.957	110.124	132.369	140.61	137.344	165.159	105.745	102.362	128.945	142.62	134.215	117.601	118.889	106.023	127.816	145.049			130.933	122.91	137.166
1913.32	233.445	208.216	227.587	214.307	252.685	253.346	205.623	153.313	231.073	179.245	227.553	195.582	263.437	168.778	230.476	180.698	208.364	230.255	165.499	246.437	232.13			122.753	109.173	112.086	123.396	110.749	102.109	109.929	133.343	141.713	134.408	162.307	106.067	102.127	128.542	140.902	132.396	118.178	118.885	105.051	126.197	143.973			130.756	121.306	136.092
1915.87	232.19	207.587	225.641	213.312	251.089	251.532	206.223	153.762	229.855	177.968	226.993	194.74	262.71	168.541	230.267	180.627	206.537	229.941	165.432	246.848	231.267			121.768	108.879	112.63	122.566	110.703	101.314	110.045	132.302	140.71	133.394	163.058	105.529	101.76	128.161	139.159	132.137	117.297	117.66	104.596	126.763	144.13			131.553	120.519	135.236
1918.41	233.115	208.241	225.879	213.289	250.597	251.524	206.535	154.094	230.027	178.831	227.115	194.742	263.379	167.714	231.364	184.14	206.239	230.389	166.001	247.641	231.636			121.783	109.047	112.79	123.085	111.579	101.315	110.13	132.382	140.536	135.111	163.46	104.862	102.151	127.429	139.124	132.614	116.982	118.201	105.259	127.143	145.036			132.509	120.994	134.572
1920.96	233.344	208.341	228.41	214.733	250.261	253.509	207.046	154.294	230.993	179.725	227.724	195.824	263.548	168.34	232.833	186.362	208.308	230.663	165.716	248.023	231.905			123.477	109.995	112.98	124.85	113.422	102.828	110.442	134.256	141.08	136.148	164.876	106.077	103.42	127.912	140.254	132.647	117.225	120.135	105.697	126.482	145.42			133.388	120.684	134.252
1923.51	233.58	208.982	228.877	214.796	250.91	255.664	207.331	153.733	231.395	179.419	227.816	195.247	262.312	169.137	232.712	182.871	208.477	231.38	166.156	247.826	232.659			123.711	110.499	114.305	124.466	113.711	105.161	110.813	133.382	140.676	136.147	167.225	106.583	103.435	129.003	140.519	132.298	118.048	120.248	107.078	128.722	145.302			132.641	120.621	134.712
1926.05	231.929	209.143	227.617	214.523	251.378	255.326	206.444	153.627	231.18	178.533	226.712	194.256	262.668	168.857	231.134	178.477	207.341	231.371	166.443	247.652	231.724			122.934	110.483	113.669	123.303	111.872	103.86	110.081	131.351	140.24	136.144	166.293	105.039	103.271	129.782	139.521	131.939	118.538	117.285	107.55	129.662	144.811			131.848	120.341	135.513
1928.6	230.93	208.681	227.638	215.52	251.242	253.01	204.595	152.32	231.73	178.669	227.828	194.385	263.545	168.229	230.164	179.131	207.824	231.041	165.843	248.058	232.164			122.832	109.825	112.758	124.1	111.019	102.333	109.209	130.161	140.56	135.568	164.694	104.62	102.928	129.193	140.101	133.503	117.943	116.806	107.242	129.023	143.844			132.015	119.705	134.952
1931.15	231.554	208.918	228.427	215.347	251.641	252.894	205.637	153.473	231.182	180.214	227.86	196.016	263.242	167.52	230.355	180.099	209.373	231.574	166.513	248.096	233.776			123.447	109.444	112.987	125.163	111.361	102.017	108.765	129.878	140.708	135.727	163.509	104.702	102.628	129.941	140.819	134.276	117.928	117.187	106.263	128.713	144.397			132.767	120.437	134.887
1933.69	232.591	210.298	228.499	215.695	252.331	253.922	207.611	153.826	231.54	180.637	227.09	198.058	263.998	168.063	230.046	177.611	209.829	232.392	166.612	248.517	233.654			123.383	109.103	112.943	124.871	111.103	101.906	108.849	131.196	141.193	134.708	163.303	104.204	103.135	129.454	139.897	133.128	117.154	116.889	105.373	127.786	145.286			132.11	120.675	135.704
1936.24	231.971	209.531	228.696	216.432	251.911	255.075	206.82	152.574	230.903	180.749	227.925	197.643	264.523	169.96	230.224	179.28	210.338	233.134	166.838	248.892	233.996			122.283	109.302	112.984	124.457	111.008	102.9	109.615	131.993	141.795	135.198	163.758	103.924	103.276	128.682	139.199	133.627	116.859	118.142	105.189	127.13	145.361			131.975	121.194	135.203
1938.79	232.495	208.702	228.602	215.657	252.4	254.867	206.617	152.52	231.577	179.389	227.859	196.714	264.632	169.284	229.814	182.365	209.625	232.539	165.737	249.738	234.404			121.271	108.835	112.926	124.344	110.798	103.133	110.021	132.099	141.472	135.929	163.888	104.697	103.344	128.932	139.832	132.804	116.909	119.376	104.902	127.08	146.366			132.135	120.604	134.683
1941.33	232.816	210.259	229.564	215.84	252.23	254.951	209.093	154.048	233.232	180.086	227.871	197.198	264.995	168.373	232.144	180.786	208.371	232.545	165.222	249.686	234.356			122.459	109.08	112.444	125.244	111.479	103.275	110.523	132.605	141.255	135.434	162.683	105.519	103.032	128.606	140.549	132.886	117.458	118.018	104.77	127.261	145.627			132.896	119.952	134.63
1943.88	232.24	210.568	230.204	215.998	252.964	256.418	209.257	154.098	232.881	180.016	228.866	197.447	267.594	169.325	232.878	179.398	208.988	232.169	167.51	250.074	235.47			124.025	110.269	112.33	126.069	111.798	102.959	110.369	132.744	141.207	135.297	162.87	105.245	102.773	130.068	141.416	135.052	118.277	118.114	105.982	126.518	145.389			133.166	120.726	135.067
1946.42	232.432	209.803	229.973	217.598	255.416	256.485	208.232	152.956	232.707	180.298	229.058	196.925	266.905	169.329	231.423	179.118	209.633	232.872	168.335	250.235	236.003			124.469	110.712	113.015	126.202	112.121	103.257	110.475	133.614	141.183	134.989	164.705	105.587	102.525	131.059	141.648	135.293	117.65	117.977	107.486	126.424	146.802			132.593	121.745	135.614
1948.97	234.212	209.405	229.132	217.097	254.889	256.817	208.259	153.933	232.586	180.296	228.63	196.431	266.647	169.896	231.573	180.59	210.356	234.183	167.247	252.358	235.864			123.097	109.658	113.853	125.305	111.855	103.913	111.083	133.119	142.368	135.779	165.408	105.55	102.625	130.634	140.363	134.94	117.615	117.113	106.853	128.513	147.282			133.358	121.823	134.472
1951.52	233.758	209.311	228.671	216.047	254.621	256.23	208.647	154.168	232.757	178.815	230.218	197.072	267.526	170.222	232.408	180.147	210.493	233.211	168.551	253.256	234.982			122.52	110.251	113.485	125.975	111.522	103.814	109.889	132.063	143.285	136.205	164.496	105.226	103.441	130.987	140.458	135.619	118.019	117.614	106.873	127.805	147.403			133.692	121.467	134.927
1954.06	234.137	210.795	228.273	218.301	254.935	256.83	208.269	154.4	232.349	181.265	231.632	198.408	269.196	170.7	232.064	179.439	210.768	234.043	169.838	253.672	236.044			122.19	110.748	113.456	126.551	110.899	104.599	109.626	132.061	143.744	136.414	164.87	106.198	103.779	130.609	141.057	135.536	118.259	118.793	106.441	127.946	147.514			132.981	121.547	135.601
1956.61	234.499	211.929	229.972	219.275	255.089	259.291	208.492	153.897	235.914	182.369	231.544	198.565	268.882	171.011	234.09	181.777	211.504	235.792	168.495	252.656	236.807			121.68	110.61	114.141	125.999	111.557	104.825	109.916	131.42	142.886	136.318	164.25	105.913	103.384	131.16	141.701	135.309	117.633	119.537	106.326	127.642	147.735			132.941	122.346	135.14
1959.16	235.448	213.029	232.675	218.312	255.948	258.647	207.484	155.288	237.379	182.469	230.435	198.623	268.232	170.308	234.973	182.484	210.801	234.765	168.66	253.084	235.911			122.829	110.563	113.197	126.392	111.819	105.479	110.111	133.059	143.55	135.963	164.883	105.501	102.876	130.605	142.745	135.87	118.634	118.567	106.414	127.024	147.358			133.808	122.117	135.634
1961.7	235.071	212.59	232.46	219.664	256.192	259.039	208.373	154.685	235.055	181.868	231.596	200.059	268.853	169.832	234.907	180.498	210.136	235.812	169.502	252.917	236.037			123.608	110.184	114.019	126.608	112.338	104.757	111.334	133.975	142.541	138.079	166.509	105.539	103.462	129.728	142.778	134.696	118.97	119.432	106.507	128.516	147.336			135.058	123.506	136.292
1964.25	236.268	212.223	233.657	221.347	256.905	258.729	210.442	154.863	235.974	182.713	232.032	200.44	270.177	170.161	235.111	182.602	211.211	237.231	168.862	255.096	236.56			124.575	110.58	113.773	126.373	113.649	104.391	112.152	135.908	143.23	139.498	167.187	106.084	105.074	130.752	141.851	135.542	120.213	119.966	107.444	130.265	147.437			136.321	122.714	136.981
1966.8	237.79	213.635	235.647	220.986	257.592	259.546	210.303	155.641	238.175	182.933	232.275	200.014	270.196	171.975	235.252	181.706	212.8	236.386	170.174	256.498	239.238			125.426	111.944	114.235	126.316	114.891	104.953	113.982	137.785	143.805	137.954	167.624	106.211	107.032	131.66	142.791	136.626	122.324	121.432	107.709	130.371	148.296			136.158	123.188	137.275
1969.34	236.9	213.273	231.376	219.437	255.674	260.492	209.263	154.746	237.633	182.603	231.814	199.848	268.848	170.894	234.841	183.021	213.583	236.177	168.15	257.041	241.09			123.471	111.652	114.134	126.134	113.728	105.842	110.362	134.22	142.919	139.055	168.856	106.947	104.448	132.075	143.994	137.129	119.745	119.096	107.245	130.265	148.321			133.862	124.248	137.798
1971.89	236.756	212.725	230.766	220.481	258.232	258.752	208.722	156.366	236.699	184.354	232.656	199.618	269.407	171.238	234.57	181.929	213.911	238.421	167.516	255.774	238.714			123.447	111.403	114.213	127.395	112.898	105.242	110.804	133.548	144.123	137.134	167.768	106.351	104.632	132.139	143.406	136.625	118.734	117.887	107.897	129.594	148.682			133.901	124.026	138.655
1974.44	235.995	210.675	231.769	220.063	257.709	258.228	210.013	155.361	236.854	183.132	233.301	197.379	269.148	171.848	234.159	181.424	214.202	236.9	168.549	255.227	238.434			123.178	111.186	113.859	127.019	113.774	105.528	110.468	133.881	143.96	136.497	166.464	106.873	104.574	133.204	142.398	137.223	118.906	117.706	107.482	130.424	148.33			135.71	123.517	137.304
1976.98	236.718	212.121	232.22	220.563	259.227	261.201	209.948	155.961	237.596	183.001	233.007	200.182	268.065	171.732	234.125	185	215.653	236.418	168.787	255.322	240.091			123.737	111.024	113.851	127.166	112.642	105.533	110.931	132.98	144.266	138.834	169.187	105.54	104.067	131.82	142.972	137.253	120.533	119.433	106.609	131.193	148.69			135.068	123.596	137.564
1979.53	237.006	211.399	230.981	219.712	257.986	261.2	211.168	156.777	235.019	183.298	233.494	199.754	267.199	171.989	234.614	183.694	212.715	237.144	168.484	257.328	237.89			125.341	111.487	114.483	126.007	112.499	105.026	111.164	133.155	143.873	137.808	168.028	105.399	103.051	131.345	143.817	136.411	120.826	120.087	106.308	129.546	148.271			134.567	122.95	137.875
1982.08	235.307	213.779	229.982	220.577	257.743	258.573	211.043	154.109	233.396	182.514	232.395	198.652	268.494	170.711	233.325	180.394	213.094	235.68	168.199	255.961	236.662			122.92	110.566	113.534	126.16	112.794	105.389	111.031	133.943	144.705	137.646	165.195	105.58	102.931	132.01	141.953	134.422	119.823	118.291	106.333	130.579	147.489			133.035	121.806	136.798
1984.62	235.456	213.415	229.859	220.04	256.671	257.596	208.544	153.869	235.941	183.5	232.386	199.288	269.715	170.369	233.923	180.007	212.701	236.498	167.611	254.417	236.913			122.457	109.193	114.005	126.739	111.742	104.043	111.118	134.052	143.661	136.421	164.372	105.417	103.73	130.784	141.518	135.334	119.067	117.809	105.703	129.849	148.859			133.689	122.067	136.44
1987.17	234.425	211.651	230.651	220	256.055	255.976	207.963	153.335	232.912	181.147	230.412	198.892	269.369	171.428	233.814	181.932	211.742	236.007	168.028	253.435	235.734			123.662	111.164	114.227	126.465	111.075	104.505	110.412	133.354	143.22	136.085	163.456	105.891	104.802	131.394	142.039	134.952	118.796	119.218	106.084	128.629	148.95			131.683	122.513	135.357
1989.72	233.73	211.892	229.157	218.56	257.547	258.017	207.433	153.925	236.308	180.889	231.88	199.705	266.582	170.592	234.412	184.187	209.895	236.573	168.083	256.807	238.228			124.547	111.566	114.898	126.234	111.668	103.443	111.206	133.09	142.107	136.353	164.075	106.431	103.597	130.302	141.174	134.928	118.743	118.066	106.928	129.036	147.448			132.511	123.487	137.562
1992.26	234.193	209.947	232.028	218.477	255.643	260.481	208.822	154.246	235.564	181.874	231.158	198.732	270.065	170.599	233.693	184.031	210.882	235.01	168.142	257.543	237.322			123.28	111.455	113.622	127.378	113.215	104.882	111.884	134.369	143.022	137.003	165.704	106.419	103.894	131.492	141.746	133.872	118.927	118.92	106.267	127.949	147.367			134.278	123.304	137.944
1994.81	233.635	209.917	229.688	218.957	254.955	257.226	206.472	155.169	234.477	181.681	228.473	197.945	267.022	169.59	233.325	183.4	209.496	235.055	166.971	254.246	236.004			123.343	110.237	113.907	123.239	110.961	103.355	110.979	133.321	142.223	135.769	166.095	105.723	102.876	130.723	141.35	135.101	119.301	117.312	106.75	128.275	146.264			133.303	121.334	137.818
1997.36	231.135	210.794	226.697	216.666	253.127	253.854	205.519	153.735	231.717	178.69	230.25	198.182	267.794	168.157	232.004	179.32	209.966	234.597	167.157	253.255	234.318			122.95	108.993	113.027	125.481	111.396	103.55	110.461	133.443	141.001	134.854	164.774	105.352	102.096	129.813	141.81	134.662	118.334	117.976	105.882	128.831	147.05			133.896	120.97	136.792
1999.9	231.422	208.878	227.464	216.501	255.42	255.091	207.676	154.081	232.16	180.164	227.532	195.655	265.695	167.915	232.021	177.919	208.875	233.064	166.07	251.367	234.179			122.375	110.677	112.425	126.241	111.695	105.009	110.842	131.68	141.966	134.577	163.429	106.413	103.376	130.102	140.849	133.849	118.023	117.385	106.139	129.17	147.463			132.217	120.018	134.451
2002.45	231.736	209.788	229.923	217.795	254.718	256.725	207.85	154.828	232.223	181.604	229.677	197.104	264.738	169.174	234.423	178.535	209.302	232.414	166.014	253.036	235.559			122.595	111.573	114.017	127.227	112.416	106.263	109.769	132.209	141.585	136.312	166.338	106.311	105.024	131.074	141.314	132.782	118.877	118.428	106.653	128.989	146.869			133.908	122.919	135.177
2005	233.244	207.539	231.251	215.699	255.234	256.869	207.132	153.799	234.781	179.908	227.799	196.431	265.332	169.071	232.366	180.742	210.377	232.823	168.332	255.539	235.633			123.061	110.717	113.734	126.062	113.077	105.82	110.428	132.58	142.244	136.051	166.202	105.976	104.182	132.87	141.461	134.048	117.939	118.03	107.981	128.782	148.299			135.501	121.059	135.449
2007.54	230.778	207.882	227.383	213.873	253.128	255.484	206.748	153.368	238.637	180.659	229.091	197.115	265.789	168.324	230.883	178.711	209.554	232.237	167.339	254.316	234.259			122.483	112.019	113.332	125.075	112.124	104.159	110.245	134.024	142.689	137.187	164.965	106.153	102.894	130.076	141.092	135.125	118.712	118.866	108.163	129.833	147.504			134.578	121.603	135.671
2010.09	229.294	208.081	229.697	215.535	252.006	254.542	204.912	152.082	239.372	182.537	227.644	195.846	263.296	169.386	231.198	181.785	208.21	232.394	165.088	254.562	233.648			123.075	110.435	113.373	126.388	113.682	103.085	110.675	133.708	142.647	135.012	166.217	105.27	101.995	131.088	141.969	136.798	117.812	117.418	106.815	129.324	147.616			134.773	120.619	135.207
2012.63	231.577	208.728	231.334	216.531	255.49	254.205	206.553	154.04	238.436	183.319	228.351	194.549	263.582	168.156	233.195	184.084	210.151	230.88	166.316	253.601	235.745			124.228	112.609	116.093	128.098	115.817	105.972	111.257	135.082	141.808	136.3	167.694	106.982	104.965	130.307	142.785	135.115	120.03	118.951	107.583	129.392	146.931			132.895	122.195	137.225
2015.18	232.381	206.44	227.243	214.273	252.257	257.388	201.779	152.016	231.749	178.932	226.957	195.335	262.274	167.92	231.053	184.128	208.169	232.614	165.287	254.435	233.217			123.008	109.478	115.408	126.708	113.287	103.405	110.575	133.883	141.792	138.908	172.448	106.264	102.387	130.301	140.793	135.69	118.17	118.047	107.346	130.831	146.599			132.985	122.501	137.276
2017.73	230.658	207.624	226.128	215.762	252.723	251.538	204.166	152.789	231.842	178.981	225.216	194.814	262.429	166.412	229.105	180.809	209.147	229.136	164.234	252.907	231.732			123.225	109.294	112.77	125.246	112.449	104.505	110.333	132.289	141.124	134.841	165.405	105.859	103.76	130.393	140.377	134.703	120.792	119.279	106.704	129.646	145.547			132.225	121.597	138.504
2020.27	227.305	205.505	224.66	215.4	251.661	253.883	202.295	151.057	228.674	178.522	227.308	194.765	260.681	166.248	228.212	177.352	207.93	231.492	164.857	248.815	230.169			123.903	109.735	112.317	123.976	111.889	103.563	109.465	131.115	140.644	135.329	164.548	105.591	103.003	130.485	140.646	134.591	117.61	116.617	108.264	128.47	144.323			130.946	121.498	134.401
2022.82	227.974	206.116	224.191	212.469	250.944	253.429	203.514	153.135	230.463	178.405	224.383	193.358	259.84	165.394	227.253	177.471	206.343	229.954	165.533	249.742	230.144			122.163	109.766	113.32	125.145	112.573	103.036	109.052	131.503	140.154	136.428	163.401	104.783	103.172	129.872	139.25	134.031	116.587	117.168	106.481	128.075	145.215			133.225	119.748	135.048
2025.37	226.791	205.438	223.761	211.228	249.774	251.142	203.17	150.484	227.856	178.511	223.221	192.848	259.366	166.045	226.058	175.908	205.724	227.689	162.51	250.348	229.992			120.433	109.055	112.523	125.285	112.786	102.869	110.045	130.557	140.713	135.361	163.212	104.759	101.736	129.039	139.394	132.694	117.915	116.207	105.152	126.359	144.514			133.034	120.695	136.955
2027.91	226.756	205.933	224.44	213.363	249.617	250.446	203.233	150.713	228.647	178.408	224.162	193.337	259.286	164.793	227.566	175.067	205.774	227.77	163.364	249.599	230.202			119.61	109.254	115.06	124.805	113.032	103.746	109.897	130.204	140.699	135.47	163.719	105.356	103.05	129.117	138.581	133.311	117.646	114.869	106.869	128.493	144.586			132.035	120.829	134.807
2030.46	228.344	204.292	222.626	212.323	249.671	250.873	202.34	149.753	229.006	176.2	224.247	192.117	258.528	165.262	225.207	173.609	206.843	226.228	163.647	249.206	229.405			120.582	108.231	113.757	123.379	110.907	102.694	108.684	129.751	140.771	133.76	164.847	103.899	102.758	128.184	138.375	132.43	116.081	114.224	105.296	127.094	143.343			131.608	121.312	134.544
2033.01	226.871	204.802	223.618	212.434	248.629	249.803	202.514	151.652	231.734	179.323	223.588	191.818	259.892	163.063	226.635	171.819	206.796	227.478	163.974	250.263	229.346			119.947	109.879	112.687	124.062	112.061	101.952	110.157	130.648	140.98	132.849	161.59	105.729	102.975	129.801	139.624	132.87	116.364	115.066	105.006	128.91	143.784			132.927	119.488	134.635
2035.55	225.542	204.748	223.604	211.808	247.834	249.2	203.374	149.997	229.26	178.289	225.013	191.657	258.059	163.88	226.68	173.245	204.996	225.019	163.054	249.505	227.846			120.144	109.251	112.609	123.389	112.447	102.385	109.563	130.353	140.969	133.24	163.616	105.263	103.478	128.546	138.739	132.016	116.769	115.1	104.644	126.672	143.83			131.983	120.229	133.142
2038.1	226.946	206.156	224.903	213.475	249.464	249.514	204.157	151.876	230.441	178.886	224.526	192.91	260.189	165.585	226.706	176.202	207.854	227.92	165.403	250.307	230.196			120.752	110.22	113.252	123.764	111.155	104.073	109.803	130.747	141.844	136.342	163.511	105.214	103.228	129.645	138.532	134.069	117.312	116.604	105.591	127.858	144.228			131.877	120.521	133.64
2040.65	228.19	204.026	225.591	212.756	249.079	250.172	204.327	151.298	231.919	177.51	224.22	193.806	258.707	164.648	226.966	180.15	206.746	227.658	165.058	249.605	230.822			120.948	109.765	112.306	123.384	110.932	103.706	109.696	131.018	141.319	134.625	161.737	104.754	102.697	130.609	139.401	133.609	117.041	116.555	105.351	128.311	144.003			133.745	122.029	134.745
2043.19	229.868	205.087	225.255	213.301	247.683	250.588	203.393	150.1	231.736	177.397	224.487	193.88	259.326	165.954	226.626	179.44	206.081	226.31	163.873	251.162	230.828			123.129	110.556	111.592	124.283	110.771	103.142	109.809	132.394	139.724	134.644	163.367	105.811	103.28	130.71	142.106	134.906	118.191	116.983	105.304	128.917	144.943			130.89	121.118	134.79
2045.74	227.531	205.544	222.964	213.35	248.328	249.487	203.111	149.661	230.21	176.6	224.09	192.898	259.799	166.801	224.977	178.068	206.801	226.65	163.153	249.428	228.764			120.834	109.462	111.467	124.27	109.817	103.161	108.875	130.363	140.699	133.822	162.77	105.139	102.981	130.102	139.44	134.188	117.068	115.766	104.2	127.947	143.504			131.759	120.811	135.448
2048.29	229.258	206.474	226.084	213.406	249.514	250.593	204.201	151.965	231.559	178.836	224.165	192.952	260.624	166.19	226.687	179.766	206.749	226.971	164.475	251.716	230.407			122.108	108.699	112.104	124.787	111.023	102.82	110.105	130.406	140.455	134.301	160.947	104.976	102.917	129.84	138.823	133.423	116.523	116.395	105.857	128.105	144.288			134.397	121.303	134.982
2050.83	230.653	205.7	227.679	214.136	249.318	251.841	204.174	152.754	231.305	178.61	226.268	194.16	261.637	166.936	228.467	181.466	207.319	227.329	166.487	253.299	232.506			122.38	109.417	112.762	125.03	111.327	103.502	110.849	131.058	141.406	135.374	162.937	105.651	103.21	130.742	141.275	135.343	117.603	117.823	106.901	126.984	145.522			133.215	120.655	134.573
2053.38	229.419	205.886	227.219	213.283	250.165	252.053	205.025	153.146	231.824	177.94	226.695	194.671	261.184	166.952	228.83	179.009	206.35	227.19	166.023	253.184	231.603			122.689	109.978	112.651	125.351	112.065	104.028	110.875	131.461	141.472	134.725	164.786	106.529	102.383	131.312	140.93	133.736	117.458	117.338	106.576	127.253	146.069			134.795	121.238	134.526
2055.93	232.47	208.59	225.469	214.107	250.117	252.963	204.099	152.681	233.404	179.8	227.076	194.713	261.691	168.22	229.26	180.71	208.298	228.107	165.425	253.888	233.543			122.398	110.23	112.749	125.357	112.365	103.608	110.352	131.957	141.721	134.438	163.714	106.111	104.007	131.205	140.431	134.274	118.051	117.9	106.385	128.887	145.662			134.749	120.816	134.702
2058.47	233.172	208.772	226.354	214.876	250.626	253.346	204.976	153.495	233.907	180.12	226.35	195.92	262.52	168.477	229.743	180.56	208.988	228.927	165.318	254.923	232.333			121.706	109.66	112.664	126.105	112.263	104.138	109.626	131.601	142.477	134.567	164.718	105.585	104.217	130.869	141.524	134.514	118.089	118.104	106.723	128.701	146.218			133.717	120.731	135.311
2061.02	232.234	208.948	227.797	215.201	252.11	253.279	205.1	153.21	234.294	180.536	226.867	196.792	262.335	167.239	229.517	178.198	207.589	228.505	165.349	256.193	233.158			121.069	109.624	112.75	126.274	112.589	103.983	109.969	131.6	143.024	134.359	164.036	106.273	104.071	130.355	141.529	134.507	117.964	118.123	105.677	128.903	145.606			133.871	120.946	135.806
2063.57	232.872	209.069	227.8	215.91	252.93	252.582	206.194	153.764	234.993	180.339	227.607	196.626	263.323	166.802	229.42	178.304	209.124	228.659	164.778	257.204	234.402			122.177	110.345	113.234	126.72	113.563	105.017	109.646	132.236	143.604	134.498	162.929	106.817	104.957	130.32	141.41	134.503	118.122	116.901	106.645	129.547	145.323			135.202	121.032	135.609
2066.11	233.788	209.647	227.166	216.215	251.165	253.412	207.394	154.827	237.209	181.343	228.485	195.781	263.898	167.701	231.914	179.524	209.024	230.257	165.209	257.498	234.824			122.516	110.726	113.695	126.715	114.142	105.045	110.707	132.674	144.728	134.973	164.495	107.203	105.029	131.287	141.695	135.359	118.992	117.522	107.681	130.55	146.19			135.464	121.798	135.767
2068.66	235.511	210.949	227.36	217.227	251.643	254.908	207.899	154.518	239.897	181.994	229.717	197.413	263.032	169.494	232.101	181.881	209.801	231.554	166.526	258.293	235.686			122.746	111.266	114.071	126.92	113.21	104.069	111.446	133.243	144.196	135.683	166.974	107.191	104.865	133.149	141.972	136.441	119.25	118.809	107.882	131.204	146.938			134.868	122.614	136.895
2071.2	236.417	211.56	228.055	217.636	253.188	256.407	208.718	155.019	238.482	182.167	230.344	198.23	263.91	170.134	232.32	182.68	210.673	232.634	167.836	258.272	235.35			123.101	111.849	114.854	127.269	112.95	104.669	111.146	134.251	144.585	137.253	166.175	107.64	104.804	133.543	143.695	137.358	118.491	118.899	107.831	131.306	147.4			135.366	122.901	137.357
2073.75	236.46	211.672	231.312	219.478	253.889	256.193	210.454	157.306	238.078	183.469	231.262	197.99	265.117	169.738	232.895	181.773	211.272	233.205	167.193	259.092	236.477			124.31	111.739	115.12	128.427	116.858	108.306	112.295	135.397	144.883	137.878	165.605	108.699	106.029	132.283	143.976	137.314	120.59	118.36	108.415	130.837	148.233			138.427	122.323	137.013
2076.3	236.048	212.61	233.215	220.778	256.883	257.329	212.453	157.415	241.932	185.547	231.972	199.341	266.632	170.586	232.684	181.68	212.404	233.885	167.9	260.391	236.862			125.26	112.829	115.965	129.6	119.591	108.957	114.143	135.197	145.59	138.139	171.685	108.216	107.536	132.75	143.529	137.846	121.436	120	110.751	133.639	150.018			139.698	122.136	137.939
2078.84	236.978	212.306	232.505	221.319	256.972	258.184	209.676	156.35	243.632	185.886	231.361	199.861	266.534	171.051	234.855	181.862	212.397	234.398	168.886	260.827	237.685			125.167	113.72	116.719	129.003	117.288	106.875	113.544	135.375	147.106	138.672	175.944	107.482	106.589	134.261	144.016	138.303	120.704	119.253	110.015	135.355	150.817			137.89	123.929	139.546
2081.39	236.593	212.342	230.869	221.765	256.631	258.288	208.948	156.235	241.127	185.632	231.448	200.634	265.858	170.655	236.367	180.475	212.167	233.041	168.996	261.637	237.729			124.678	111.956	116.499	126.8	114.895	106.191	112.424	134.656	145.471	138.765	172.337	107.505	105.964	133.577	144.067	138.981	120.239	117.303	108.292	133.689	150.041			136.615	124.593	139.726
2083.94	236.744	212.176	232.671	220.227	258.044	257.99	210.18	155.824	239.195	183.986	231.779	200.356	268.351	171.44	236.064	181.885	212.771	234.148	168.87	260.654	238.007			125.514	111.423	114.855	126.864	113.939	105.758	111.934	134.426	145.02	138.907	167.783	107.86	105.279	132.318	142.978	137.043	119.851	118.182	108.457	131.832	147.73			136.661	123.621	138.27
2086.48	237.783	212.783	233.904	221.095	256.577	256.837	210.067	155.377	238.749	182.994	232.364	199.094	269.509	169.778	236.675	180.32	213.449	235.732	168.853	261.63	238.218			124.32	111.757	114.192	127.728	113.687	105.605	112.689	134.05	146.038	137.276	166.063	106.958	105.49	134.152	142.581	136.03	119.519	118.886	108.764	131.009	147.577			135.644	122.911	137.947
2089.03	236.975	213.064	233.194	222.144	257.481	258.929	209.628	156.441	239.238	184.024	232.804	200.49	270.259	170.253	235.285	178.648	213.309	236.101	168.849	262.98	238.026			123.455	111.675	113.627	127.877	112.912	105.979	112.183	133.93	146.7	137.847	167.675	107.14	105.33	134.221	143.758	138.162	120.339	118.878	108.024	131.711	148.308			136.429	123.421	137.406
2091.58	237.372	213.951	232.476	222.734	258.849	260.147	211.135	157.804	239.978	185.213	232.873	202.156	271.593	171.352	236.83	181.41	214.936	237.994	168.56	265.51	240.248			124.692	112.672	113.436	129.138	112.537	106.387	112.704	133.71	146.867	138.761	165.683	107.972	104.857	135.121	143.728	138.519	120.27	119.4	108.776	130.905	149.192			138.327	122.928	138.012
2094.12	238.642	214.416	234.439	222.798	259.488	260.054	212.622	158.038	239.444	183.695	232	201.175	270.917	171.428	236.087	180.884	213.813	236.684	169.643	264.983	240.37			125.068	112.577	114.306	130.226	115.573	108.168	113.31	135.023	147.65	139.875	166.173	109.436	106.707	135.96	143.595	138.006	120.438	120.276	109.106	131.876	149.015			136.457	122.433	138.732
2096.67	238.951	215.736	235.569	225.342	259.784	262.03	212.816	158.905	243.56	187.301	234.913	204.091	272.606	173.168	238.3	180.57	216.5	238.674	171.334	265.407	242.547			127.277	113.619	116.652	129.436	117.259	108.424	114.178	135.737	148.009	141.168	170.036	109.707	105.855	134.62	146.287	138.986	120.681	120.614	108.771	133.562	149.762			139.334	124.057	139.567
2099.22	239.601	216.006	235.14	224.899	262.205	261.392	214.567	159.177	243.404	187.065	234.859	205.773	273.2	173.704	238.373	182.042	216.249	237.542	171.478	266.263	242.812			127.287	113.766	114.952	130.962	118.906	107.792	115.723	135.71	146.412	140.04	171.621	111.035	107.771	135.363	144.765	139.216	123.222	121.195	110.004	133.377	151.09			138.953	124.809	138.95
2101.76	243.54	216.763	236.961	226.184	262.284	264.219	211.835	162.024	242.699	188.813	234.925	204.285	272.465	174.092	238.791	183.564	215.811	240.553	171.565	269.302	243.435			126.623	114.818	118.335	131.686	116.23	108.332	115.397	134.266	147.092	142.573	174.004	109.174	106.509	135.716	146.241	138.651	122.803	121.252	111.691	134.643	151.659			139.029	124.824	139.447
2104.31	240.928	215.446	234.95	223.726	261.81	264.236	212.937	158.975	243.403	186.465	235.411	201.263	273.482	173.8	237.204	182.925	217.301	238.76	170.913	267.448	241.197			127.001	114.238	118.504	130.621	115.585	108.306	113.762	134.588	147.177	139.627	172.057	109.279	107.568	134.91	146.925	138.254	121.467	119.626	109.195	135.483	150.439			138.506	125.316	139.964
2106.86	240.215	215.186	234.725	224.554	263.29	261.915	213.966	158.811	244.557	186.147	235.764	203.839	273.053	173.832	236.711	180.281	214.749	239.07	171.113	266.723	244.117			125.395	114.583	117.022	128.785	115.413	107.772	115.115	136.383	147.855	138.815	169.833	108.228	106.562	134.343	145.862	139.087	122.315	120.347	109.49	133.292	149.923			138.301	124.889	139.799
2109.4	241.98	218.518	236.519	222.244	262.166	265.011	211.475	157.829	244.055	188.161	235.052	201.597	271.993	171.985	240.27	183.429	216.681	239.499	171.054	271.007	243.404			126.637	113.499	116.791	130.485	116.84	107.635	113.633	135.731	148.298	138.847	169.104	109.446	106.993	135.019	147.478	139.842	121.423	121.007	108.94	133.509	150.308			138.205	125.945	139.721
2111.95	241.254	216.469	235.065	224.117	262.137	263.9	213.827	159.991	242.517	188.28	236.742	205.128	273.633	172.76	238.786	181.284	215.581	239.263	171.313	269.384	244.233			125.186	113.617	115.674	129.492	115.019	108.744	114.136	135.133	149.181	141.049	170.513	110.018	107.085	136.303	146.025	140.774	121.068	120.406	110.179	134.315	150.312			138.568	125.281	139.321
2114.5	242.491	216.148	234.959	225.414	263.738	265.242	214.122	159.502	244.263	186.911	237.758	204.532	273.28	172.629	239.171	183.14	216.222	239.9	171.756	270.138	243.535			126.959	113.499	116.239	131.676	115.422	106.967	113.019	137.189	149.384	139.335	168.842	110.317	106.651	136.42	146.209	139.779	121.176	119.751	110.679	133.117	149.859			138.755	124.692	140.553
2117.04	242.869	215.98	236.636	224.467	264.205	265.502	213.74	158.149	243.06	189.728	235.658	202.762	275.453	173.844	239.401	183.212	217.55	239.388	170.972	271.105	244.635			125.144	112.82	116.049	130.721	117.328	108.156	115.892	136.759	149.601	139.729	167.823	110.544	107.983	136.416	145.887	140.721	122.282	121.05	110.581	134.564	151.068			139.874	123.859	140.399
2119.59	241.911	215.354	235.063	225.455	263.359	265.226	213.971	157.569	245.579	187.299	237.158	204.032	272.517	171.25	239.297	183.833	215.038	239.645	170.779	270.979	243.443			124.806	112.563	117.339	130.53	117.885	108.122	114.559	134.332	149.02	140.689	170.807	110.137	107.313	135.302	146.975	140.17	121.578	120.649	110.806	133.46	149.806			138.329	125.046	140.403
2122.14	243.466	216.439	237.962	227.142	263.709	263.977	213.485	159.599	242.258	187.207	237	204.551	272.728	173.128	236.551	183.616	217.186	239.972	172.344	269.578	241.708			126.376	114.06	115.914	132.786	119.391	108.986	115.826	135.403	149.671	140.23	169.792	110.948	107.909	136.513	146.84	140.189	122.155	121.142	111.013	133.748	151.385			140.514	125.295	141.672
2124.68	241.884	214.689	235.829	226.358	262.947	266.652	213.104	158.233	243.595	187.116	236.338	204.088	270.993	173.927	237.79	182.66	217.168	239.633	172.232	268.729	241.317			126.498	114.206	117.418	131.104	117.346	109.608	114.681	135.859	148.683	140.57	172.966	110.024	107.425	136.778	146.785	141.044	120.706	121.146	111.692	136.615	151.562			139.361	124.919	140.593
2127.23	241.48	212.99	234.992	224.152	262.196	266.2	212.362	158.125	244.66	185.938	235.029	203.326	272.344	173.042	237.982	180.965	217.44	236.978	170.447	268.956	242.031			125.892	114.191	116.184	129.367	116.213	108.416	112.657	134.275	148.73	139.808	170.997	108.829	106.611	135.985	145.783	141.539	120.306	119.891	110.541	134.763	151.161			139.29	126.099	141.24
2129.77	239.869	214.151	234.228	224.217	260.524	262.942	212.727	157.651	243.221	187.264	235.332	202.981	271.764	172.557	238.296	181.675	216.567	237.357	169.87	268.891	241.491			125.208	112.963	116.013	129.278	115.965	108.582	113.086	134.613	148.023	138.964	169.814	109.65	106.535	136.131	145.877	140.97	121.155	118.869	111.253	133.266	149.948			139.276	124.543	139.583
2132.32	239.219	214.176	233.632	225.304	260.787	262.181	212.175	158.357	242.565	188.126	235.121	202.424	269.437	172.461	238.749	183.984	214.633	238.197	171.175	267.203	241.874			124.516	113.24	117.124	130.216	116.084	108.054	114.441	134.375	146.387	139.14	168.747	110.329	106.423	135.504	145.881	140.224	121.06	119.941	110.57	133.56	150.767			139.904	125.518	140.106
2134.87	239.023	214.364	235.779	223.629	260.831	260.532	210.619	157.927	241.532	188.026	233.389	201.7	269.599	172.374	237.899	185.487	214.6	238.625	170.562	266.55	241.565			126.173	113.428	116.828	130.927	116.753	108.888	114.125	134.707	147.134	140.054	170.886	109.756	107.005	135.663	146.11	140.464	121.354	120.45	110.001	134.053	151.586			139.235	124.966	140.558
2137.41	240.095	213.529	236.095	224.368	260.64	261.939	210.801	158.172	240.708	186.969	231.921	201.303	268.592	172.494	236.268	184.943	214.353	239.023	170.067	267.289	241.476			127.303	113.554	116.197	131.387	116.692	109.003	115.711	136.478	147.756	139.958	171.704	109.71	107.947	135.563	146.04	139.321	121.363	120.784	109.919	134.567	150.84			139.277	125.735	141.065
2139.96	239.293	213.844	234.895	223.578	259	261.646	211.1	158.738	242.078	185.375	234.146	200.57	268.973	172.794	234.885	183.483	214.708	237.813	169.68	269.203	240.678			126.378	113.421	116.533	130.072	116.988	108.326	114.337	136.013	147.051	140.032	171.271	108.79	107.026	135.669	145.416	138.725	121.496	120.509	110.35	134.014	150.267			139.364	125.393	140.031
2142.51	237.686	213.544	234.734	222.649	258.474	259.502	210.814	159.581	243.322	186.445	233.2	201.393	269.002	171.704	236.011	180.553	215.667	236.553	169.039	269.636	240.071			126.167	114.43	115.848	130.347	118.629	109.107	113.318	136.539	147.543	138.88	169.389	109.193	107.081	136.032	145.393	140.24	122.015	119.804	110.437	133.904	150.615			139.735	124.535	140.329
2145.05	236.204	213.325	233.24	222.67	258.085	258.993	210.855	158.332	240.69	186.713	232.157	201.227	268.452	172.127	235.433	180.055	214.012	236.42	169.003	269.612	237.285			126.025	113.978	115.167	129.852	119.037	109.663	114.293	136.153	147.664	139.542	170.978	109.367	108.044	135.867	145.39	140.468	122.994	118.599	110.682	135.213	150.355			139.533	124.258	139.265
2147.6	236.901	212.981	230.915	221.96	256.814	259.466	209.228	156.734	239.525	185.814	230.905	199.144	266.089	171.711	235.336	180.758	212.731	234.623	167.115	268.403	236.245			124.52	112.833	116.026	128.13	115.31	108.331	113.922	134.031	147.146	140.481	172.074	109.047	107.2	135.157	145.27	138.933	120.989	118.485	110.545	134.776	149.328			138.269	125.856	139.02
2150.15	235.436	211.024	232.556	221.84	256.366	258.078	207.831	156.513	239.419	184.926	229.394	198.361	264.541	170.465	236.238	179.622	212.835	233.216	167.548	266.314	236.171			123.701	112.452	116.267	127.309	114.454	107.538	113.78	133.024	146.338	139.339	167.735	107.984	105.957	134.156	143.997	138.966	119.9	118.498	108.943	132.45	148.682			136.945	124.51	139.838
2152.69	234.179	210.623	232.494	220.042	255.626	256.457	207.173	156.013	238.664	184.4	229.982	198.575	264.411	169.387	235.277	179.161	211.609	233.429	167.486	265.456	237.572			124.329	112.837	117.386	126.959	114.86	106.26	113.218	133.591	145.662	137.982	167.476	107.668	105.673	133.353	144.039	138.865	119.076	118.382	109.199	132.835	147.882			136.766	123.571	138.813
2155.24	234.233	210.527	231.736	219.088	256.637	258.066	206.62	154.889	239.881	183.952	230.383	198.464	264.708	168.551	233.249	179.624	211.154	231.651	166.647	264.73	236.228			124.188	113.171	115.944	128.003	114.774	106.485	112.419	133.78	144.982	137.788	168.873	108.604	105.763	133.807	144.056	137.56	119.232	117.382	108.646	132.618	147.884			135.424	124.267	137.357
2157.79	232.912	209.787	230.467	221.177	255.431	256.029	206.92	155.527	240.175	183.211	229.399	198.68	264.107	168.564	232.849	181.048	211.159	231.019	167.256	264.647	235.258			125.244	112.323	114.212	128.583	114.358	106.88	113.009	132.625	145.452	135.719	166.108	108.595	105.828	135.064	142.735	136.812	119.413	117.506	108.69	132.332	147.406			135.016	123.934	137.715
2160.33	233.511	210.936	232.071	219.909	256.521	256.508	207.465	157.305	239.45	183.945	229.273	197.027	264.078	170.376	231.553	183.638	211.001	232.311	167.669	265.626	236.587			124.909	114.2	115.236	128.704	115.4	107.505	113.302	133.915	145.738	138.904	165.873	109.249	106.169	135.04	144.093	139.013	119.551	118.327	109.005	133.514	148.357			137.015	124.023	137.6
2162.88	232.91	210.249	230.262	218.756	254.884	257.177	208.019	157.566	239.679	184.979	228.545	197.836	263.395	171.26	232.466	181.479	210.987	232.39	168.368	266.42	237.447			124.808	113.836	115.942	129.112	114.745	107.308	111.995	133.144	144.843	141.14	166.977	109.339	106.356	134.612	145.407	140.043	119.527	119.276	108.881	131.151	147.395			136.665	124.954	136.42
2165.43	233.796	210.618	230.32	218.523	254.506	256.419	207.759	156.144	238.416	184.421	227.607	197.525	262.755	168.909	231.479	178.94	211.784	231.977	166.008	264.238	235.961			124.515	112.303	115.487	130.205	116.045	107.079	111.071	133.311	145.554	138.307	168.282	109.221	106.767	133.633	144.98	138.451	119.911	119.106	109.671	132.932	146.349			138.38	124.23	138.046
2167.97	231.89	209.667	226.707	218.061	253.858	255.878	204.274	155.064	237.924	184.472	227.574	197.416	262.04	168.891	230.523	177.448	211.231	231.907	166.515	264.119	235.666			122.934	111.529	115.188	126.587	115.596	106.561	110.539	132.525	144.293	137.532	171.079	107.573	106.192	133.654	143.442	138.96	119.105	116.858	109.779	131.21	147.312			136.132	123.088	138.132
2170.52	229.811	210.552	226.91	219.934	253.983	255.43	204.824	155.58	237.598	182.909	227.361	198.976	264.005	167.411	228.746	176.894	209.6	231.071	165.23	263.477	234.298			123.25	111.49	114.344	126.425	113.082	105.027	111.919	131.46	143.883	135.911	166.807	107.17	105.137	133.964	142.95	137.159	117.713	115.935	107.719	131.002	146.446			134.757	124.221	140.12
2173.07	229.986	206.102	230.96	218.787	254.039	254.104	205.995	156.641	237.155	183.201	229.831	199.892	261.755	166.973	229.513	176.45	210.14	232.72	165.59	265.384	235.157			123.388	110	113.097	126.054	114.332	104.483	112.398	132.563	145.74	134.256	165.579	108.567	105.764	131.587	142.685	137.188	118.651	118.074	107.884	131.233	145.572			135.847	121.817	136.266
2175.61	229.288	206.643	230.297	217.662	253.853	258.07	206.16	157.586	238.511	183.765	227.786	201.118	262.313	168.529	231.55	179.837	211.569	231.687	165.346	264.195	235.384			123.566	110.034	112.944	126.542	112.55	106.113	111.348	132.018	145.805	136.632	167.596	107.149	105.906	133.485	142.993	136.608	118.488	116.765	106.067	130.796	145.827			135.605	121.183	137.599
2178.16	231.271	208.513	232.723	220.681	254.277	256.546	206.914	157.974	239.128	184.934	226.552	200.176	263.765	167.897	231.54	179.837	210.277	231.66	166.89	265.099	234.293			124.189	110.9	113.323	127.353	113.169	104.388	110.636	132.47	145.141	137.592	165.037	107.384	104.491	132.538	142.999	137.141	118.109	116.981	107.691	129.468	146.008			135.09	122.727	137.956
2180.71	231.285	209.194	234.221	221.657	253.929	256.434	205.6	158.366	240.024	186.671	227.923	202.744	263.472	166.763	232.843	182.9	210.349	229.489	166.713	263.467	236.502			124.426	111.409	113.531	127.143	114.731	105.917	111.522	132.638	144.561	137.443	164.266	108.135	107.278	132.512	141.004	137.419	117.754	119.121	107.074	129.274	147.64			135.259	121.534	137.548
2183.25	232.07	208.234	233.344	220.671	255.265	256.843	206.423	158.425	239.959	185.54	228.15	201.632	261.562	167.607	232.056	181.351	212.146	232.89	167.443	263.576	235.987			123.976	112.029	113.299	127.617	114.192	105.988	110.992	133.223	146.384	137.008	167.047	107.551	106.643	133.342	141.407	136.57	118.428	117.93	108.052	131.874	146.463			135.945	122.008	137.366
2185.8	231.609	208.322	231.398	220.016	255.89	258.562	206.557	159.198	237.134	185.412	228.244	200.504	261.075	168.298	231.376	179.515	210.456	229.494	167.769	265.223	236.464			125.555	110.53	114.531	127.506	114.326	105.012	111.936	132.854	144.455	137.259	167.71	107.731	106.058	132.474	142.445	136.763	118.216	118.875	106.468	130.325	147.028			135.71	121.894	138.189
2188.34	231.66	209.577	228.471	220.093	255.936	256.714	207.318	158.742	240.223	186.014	228.692	200.603	263.838	168.086	230.762	176.039	210.051	230.146	165.943	264.546	236.485			123.646	109.798	113.514	126.747	113.892	105.481	110.629	133.122	144.465	136.061	165.182	108.002	105.794	132.454	142.529	136.629	118.402	116.199	105.936	131.292	146.547			136.156	121.973	137.33
2190.89	231.568	210.525	228.568	220.141	255.687	255.281	206.034	156.752	236.559	185.285	228.05	201.581	264.019	168.561	231.268	175.467	211.443	231.863	165.38	265.564	236.859			123.871	110.572	112.357	126.606	113.211	105.2	111.561	131.716	145.804	135.26	163.321	107.922	106.107	132.08	141.798	135.841	117.538	117.478	106.374	130.171	145.502			135.572	121.305	136.413
2193.44	232.695	210.839	229.47	220.332	254.655	256.007	206.498	156.681	238.243	185.666	230.119	200.946	264.287	168.39	231.899	175.117	210.982	232.413	166.097	265.763	235.372			122.982	110.917	111.672	127.173	112.035	105.24	110.659	131.639	145.177	135.921	165.121	107.069	105.496	132.079	141.758	136	117.572	117.454	107.124	129.07	146.071			135.097	121.699	136.3
2195.98	232.942	209.77	231.201	219.814	255.07	258.531	208.441	156.712	238.772	184.74	229.898	201.019	265.285	169.153	231.38	177.14	211.063	232.611	167.754	266.683	236.583			123.655	111.268	112.689	127.794	112.618	105.683	111.4	131.942	145.157	135.54	164.884	107.412	105.198	131.945	142.206	136.727	118.04	117.519	108.567	128.609	146.136			136.124	122.563	136.315
2198.53	232.976	209.081	231.233	219.667	255.64	259.075	208.774	156.159	237.934	184.739	230.393	200.237	264.996	167.87	231.099	178.1	211.912	233.184	167.476	265.684	236.309			123.82	111.394	113.798	127.371	112.744	105.516	111.25	132.202	145.143	136.638	164.31	107.54	105.275	132.636	141.607	136.559	117.563	117.273	108.064	128.404	147.734			136.58	123.612	137.318
2201.08	233.203	211.276	231.415	221.132	255.976	258.686	209.571	155.367	239.211	184.704	231.017	200.73	264.348	168.204	233.061	178.687	212.462	233.619	167.426	266.494	235.567			123.217	110.304	114.05	126.867	113.064	105.715	111.877	132.148	145.858	137.183	165.588	107.89	105.482	133.026	142.355	135.47	117.489	117.811	107.238	130.128	147.371			135.333	122.866	136.811
2203.62	233.316	213.03	233.277	220.72	255.865	257.436	209.23	156.921	240.399	184.717	230.355	200.519	264.719	168.72	233.715	177.312	212.544	233.758	168.191	267.327	237.595			123.719	110.806	114.504	126.956	113.059	105.506	112.635	133.757	147.303	136.774	165.6	107.836	105.278	133.284	143.433	135.829	119.426	118.573	107.741	131.001	147.388			135.562	121.893	135.878
2206.17	234.572	213.884	233.122	222.187	257.132	258.119	209.732	157.39	241.324	184.566	232.405	200.692	266.882	170.561	233.4	177.728	212.213	234.259	168.564	269.709	239.213			123.675	111.514	114.708	128.049	112.867	105.749	112.997	133.309	146.326	137.066	167.565	108.002	105.457	134.002	143.285	137.148	119.532	118.263	106.727	131.427	148.088			136.215	122.456	136.699
2208.72	234.997	212.916	233.38	224.227	257.103	259.634	210.847	157.529	243.704	184.945	232.658	201.683	267.841	171.508	234.296	177.655	212.933	234.618	168.824	271.129	238.905			123.38	111.548	114.01	128.672	113.546	106.306	113.204	133.209	146.421	136.718	167.244	107.344	106.051	133.638	143.473	137.731	118.481	117.578	106.407	131.256	148.247			136.125	122.608	136.794
2211.26	234.927	214.43	235.784	223.38	257.733	261.014	211.054	157.283	242.671	188.045	231.466	202.488	270.113	171.595	235.169	179.911	213.965	235.82	169.054	271.801	240.2			123.301	113.01	115.229	130.185	114.771	107.128	113.38	134.04	147.323	138.134	167.952	108.026	105.374	134.188	144.201	138.312	119.166	117.729	107.963	131.387	148.684			137.544	122.743	137.757
2213.81	237.731	215.897	235.816	224.81	259.066	262.843	211.778	157.103	242.199	186.043	232.897	202.26	268.303	171.561	235.606	182.168	213.952	236.446	169.03	272.259	241.364			123.675	112.313	115.084	130.237	115.116	107.031	113.299	133.757	147.652	138.463	169.894	108.059	106.326	134.43	144.105	138.485	119.772	118.994	108.73	130.486	148.962			137.962	125.078	138.277
2216.36	238.38	215.222	236.224	224.298	258.623	261.523	211.063	157.261	245.15	186.132	232.709	203.31	268.385	172.924	234.827	181.179	214.367	235.593	170.294	272.341	240.936			123.662	112.091	114.014	129.778	114.976	107.347	112.262	134.418	148.308	138.132	169.377	108.407	107.501	134.099	144.032	137.677	119.166	119.078	109.326	130.537	149.476			139.067	124.877	139.31
2218.9	240.837	216.718	236.522	223.967	258.671	263.123	212.115	158.591	246.477	188.311	235.047	203.898	271.175	173.486	236.318	180.629	214.922	237.702	170.496	274.523	241.608			124.884	112.428	114.641	130.464	116.292	106.915	112.861	134.904	147.923	138.243	170.599	110.507	107.021	135.195	145.135	139.357	118.306	120.676	108.886	131.828	150.621			138.128	123.627	140.88
2221.45	239.47	216.747	235.461	225.525	260.616	263.7	212.378	157.032	247.516	188.544	236.299	204.683	272.181	172.662	237.87	180.771	215.106	238.552	171.529	274.879	242.174			125.479	112.623	115.388	129.354	115.564	106.623	113.256	136.22	148.612	137.801	170.51	110.036	106.653	135.169	144.953	138.557	120.652	119.303	109.094	132.006	150.131			138.302	124.954	138.34
2224	239.994	216.012	236.007	226.543	260.716	263.008	214.186	158.575	244.819	188.323	233.914	205.315	272.057	174.05	239.577	181.428	216.204	239.012	171.859	275.989	241.681			126.896	112.259	116.898	129.498	114.917	106.114	113.929	134.002	148.979	139.213	170.506	109.315	107.599	135.889	146.838	140.147	120.163	118.091	108.35	131.678	149.291			137.885	123.683	140.963
2226.54	240.031	218.213	239.072	225.779	260.933	260.533	213.175	159.3	248.285	189.052	238.458	204.777	272.801	173.876	238.405	181.446	216.119	238.039	170.632	275.473	242.083			126.766	113.137	116.26	131.074	117.583	108.034	114.745	135.429	147.714	139.059	169.99	109.326	107.39	134.491	144.649	137.22	120.686	119.285	108.489	130.506	149.003			140.681	122.879	138.713
2229.09	239.509	218.501	237.66	226.45	261.999	265.395	215.221	157.699	250.336	190.121	236.346	206.311	271.459	173.064	237.984	184.694	217.918	237.16	170.671	278.188	244.304			125.364	115.7	116.099	131.039	117.854	109.045	114.836	137.584	149.454	140.75	172.878	109.486	108.992	134.673	147.929	140.311	120.185	120.625	109.786	134.461	151.587			140.483	123.682	140.663
2231.64	243.839	217.915	242.584	230.016	264.211	266.337	213.98	162.196	251.279	191.567	238.332	208.725	274.622	175.255	240.551	184.87	220.36	239.542	171.19	278.037	245.147			126.284	115.149	118.276	132.997	121.019	110.049	116.803	138.524	149.463	140.661	178.063	110.657	109.903	134.979	146.43	139.519	121.913	122.665	110.863	131.854	151.956			140.741	124.26	140.735
2234.18	242.732	218.604	237.419	228.777	264.436	267.139	215.022	160.329	250.559	190.281	235.146	206.9	273.229	174.94	243.258	185.368	220.878	238.588	172.201	279.614	243.195			124.667	113.154	120.091	132.125	116.425	109.48	113.588	134.692	150.724	143.692	181.841	110.617	107.494	135.914	146.876	139.97	121.847	120.97	110.155	134.415	150.829			139.266	125.581	141.707
2236.73	244.869	218.821	239.86	229.092	263.701	266.523	216.049	161.313	250.164	191.092	237.591	208.127	272.523	175.687	240.366	185.486	219.44	241.901	172.147	278.903	243.249			126.257	113.278	116.852	132.603	117.764	107.883	115.405	138.6	150.868	141	174.219	108.783	108.714	135.572	146.855	139.678	121.56	120.418	109.796	132.705	151.024			142.019	126.266	141.735
2239.28	244.788	219.038	240.996	229.442	263.651	266.627	216.449	161.639	251.086	191.559	238.49	206.755	275.485	175.576	241.046	185.185	217.079	242.216	172.147	281.015	243.937			126.341	113.036	116.672	131.963	118.534	109.322	114.52	136.807	150.896	141.369	174.991	110.474	108.62	136.727	146.526	140.874	121.684	120.298	109.401	133.335	151.97			140.555	125.38	140.366
2241.82	244.003	218.277	238.96	228.431	264.782	267.527	214.694	159.652	249.29	190.005	238.96	206.959	275.657	174.953	240.923	185.924	220.333	242.006	172.488	280.672	244.883			125.766	111.891	117.821	131.197	116.146	108.462	113.501	135.27	150.189	141.929	175.319	110.164	107.815	136.854	145.88	140.296	120.268	119.831	110.155	132.213	151.446			140.932	126.52	139.937
2244.37	245.862	219.539	239.362	229.621	265.17	268.214	214.033	161.23	249.365	191.156	239.396	207.946	275.12	174.584	240.7	182.844	219.902	242.335	173.167	282.909	244.71			126.392	113.274	116.36	131.288	116.108	108.235	113.926	135.958	149.939	140.428	171.824	110.248	108.039	136.539	146.094	140.215	121.089	120.392	110.694	133.135	151.517			140.859	125.545	140.952
2246.91	245.29	219.66	240.07	229.576	264.292	267.11	216.583	161.646	249.59	191.4	238.009	207.569	275.553	174.482	240.021	181.844	220.209	239.987	171.786	281.476	243.681			126.512	113.99	115.886	131.936	117.837	108.823	114.119	136.4	150.539	139.898	170.985	110.059	108.002	137.296	147.063	139.692	120.788	119.995	110.062	133.531	151.069			141.349	125.089	141.481
2249.46	246.242	219.742	238.658	228.886	265.253	267.366	216.436	160.816	250.343	190.134	239.123	207.855	275.251	174.69	240.763	183.273	220.653	242.71	169.837	281.686	244.416			125.075	113.822	116.496	131.152	117.332	108.626	114.645	135.526	150.779	140.763	174.04	109.953	107.8	136.754	146.54	140.413	122.102	120.045	110.139	133.37	151.549			140.029	126.365	140.52
2252.01	246.293	220.063	238.652	229.162	264.117	266.741	217.801	162.093	251.797	191.626	239.256	207.337	275.925	174.028	241.147	182.684	219.762	242.922	171.548	281.431	244.671			124.963	112.552	116.959	130.429	116.434	107.926	114.595	135.436	150.839	141.324	173.69	109.962	107.918	137.502	146.196	139.915	121.678	119.526	109.884	133.476	152.034			139.851	126.603	141.736
2254.55	247.45	220.562	241.225	229.536	265.181	268.612	217.548	162.027	251.897	191.611	240.438	206.377	276.533	175.936	242.024	183.555	219.933	242.305	173.225	282.067	245.412			126.288	112.996	117.544	131.131	116.412	108.193	114.098	136.056	150.358	141.617	171.967	110.082	107.547	138.573	147.811	141.243	121.454	120.96	110.488	133.509	151.892			140.55	124.088	141.013
2257.1	247.208	220.117	240.611	229.092	266.231	267.21	215.367	161.825	249.561	190.297	240.297	206.615	277.078	176.219	240.77	184.284	220.728	240.601	172.551	281.55	245.899			126.716	113.751	117.705	132.302	116.037	107.992	113.163	135.538	150.257	141.304	172.6	109.67	107.007	137.075	147.936	140.707	120.972	120.574	110.116	133.007	151.639			141.062	124.81	140.947
2259.65	246.524	219.168	238.994	228.905	264.362	266.31	215.459	162.872	251.475	192.453	239.572	206.307	275.787	175.899	241.545	182.219	220.68	242.987	172.253	281.152	244.961			125.849	113.583	116.218	132.426	116.556	107.984	113.504	134.887	151.412	140.966	170.445	109.133	107.718	136.765	147.598	140.634	121.573	120.875	110.507	133.212	151.828			140.752	125.721	140.453
2262.19	247.057	219.946	239.055	227.356	264.802	267.09	213.861	159.968	252.569	192.438	239.699	206.858	274.977	175.063	240.9	181.987	220.248	241.752	169.682	282.639	243.137			124.965	112.558	115.56	131.605	114.821	107.735	114.258	134.386	150.277	140.584	172.076	109.922	107.581	135.883	147.631	141.226	120.887	120.84	110.492	133.209	151.441			139.121	125.824	139.602
2264.74	245.598	219.09	237.389	227.706	265.162	267.917	213.508	159.203	250.077	193.123	238.431	206.239	275.217	175.084	240.578	181.887	218.681	240.258	170.775	282.452	245.065			125.199	112.543	115.724	131.319	114.853	107.388	113.538	135.607	150.116	139.848	170.758	109.065	106.02	136.015	147.255	140.842	120.492	119.622	108.985	133.07	150.623			138.513	125.532	140.854
2267.29	246.848	219.468	240.119	230.309	263.729	265.812	212.989	161.28	247.563	190.472	240.961	205.867	277.378	175.609	243.466	182.067	218.077	239.889	172.463	282.236	245.682			125.882	112.626	114.614	131.478	117.653	108.693	114.491	136.332	149.782	139.529	169.42	111.313	107.277	135.781	147.716	140.864	121.349	121.141	108.732	133.187	151.631			139.442	126.345	139.789
2269.83	247.317	217.383	237.519	228.834	263.957	264.523	212.532	158.985	249.288	190.42	238.899	204.426	274.042	174.269	239.175	182.211	217.927	240.776	170.631	282.724	243.931			126.398	112.91	115.613	130.151	115.642	107.783	112.851	134.586	149.29	141.183	170.675	109.278	106.91	136.28	147.341	141.411	121.743	121.062	110.24	134.061	150.198			138.021	124.572	140.876
2272.38	247.567	218.051	237.744	228.603	261.431	265.289	214.39	162.635	249.609	191.523	239.608	205.91	275.934	174.393	242.31	181.279	218.477	240.02	172.763	281.883	242.608			126.782	112.879	115.245	131.72	114.488	107.805	113.768	134.922	150.777	139.429	168.822	110.229	107.207	136.009	146.599	140.431	120.507	120.287	111.205	134.241	151.69			139.13	124.302	141.838
2274.93	247.303	218.421	235.896	227.461	260.553	263.981	214.168	162.056	249.207	191.167	238.902	205.447	272.748	174.2	241.364	180.781	218.809	240.36	171.25	281.708	243.767			125.403	112.597	115.773	131.214	114.386	108.703	113.091	134.699	149.495	139.62	170.155	111.223	107.23	137.535	146.529	142.014	122.172	118.39	109.399	135.163	150.096			139.078	124.319	140.225
2277.47	249.248	220.487	235.35	226.385	263.747	263.239	213.331	161.721	248.184	189.386	241.483	203.982	273.967	174.462	240.683	181.65	215.465	238.652	171.34	281.954	242.633			125.495	113.682	115.487	131.513	114.262	107.772	113.169	134.262	150.877	138.725	170.031	109.537	106.72	136.744	148.033	142.761	122.022	118.251	110.099	133.124	150.245			138.976	126.005	139.554
2280.02	245.984	220.824	236.664	228.108	260.561	263.269	211.477	160.784	245.845	190.361	237.975	204.283	272.073	175.209	236.773	184.077	217.105	240.243	171.2	281.783	242.094			125.112	113.035	115.142	130.729	115.756	107.472	113.622	136.1	149.561	139.652	169.67	110.872	108.077	137.791	148.07	141.11	121.336	118.586	110.21	133.26	150.271			140.124	124.66	139.662
2282.57	250.003	219.55	237.827	227.83	264.663	262.433	213.41	161.249	250.275	190.416	240.151	205.095	274.458	175.789	241.978	183.937	218.39	240.382	172.138	283.984	243.74			127.305	113.601	117.189	130.57	116.441	108.184	114.639	136.547	149.005	140.347	172.626	110.593	108.633	136.714	148.823	142.091	121.46	120.708	110.562	132.857	150.475			140.569	124.926	140.794
2285.11	248.661	218.258	239.347	228.33	262.837	265.275	213.643	160.953	250.806	191.351	237.014	205.846	272.006	174.88	239.512	185.36	216.352	238.54	172.619	282.841	242.774			126.179	113.05	116.023	132.984	116.469	109.321	113.486	134.962	150.022	140.576	170.164	110.143	109.253	136.172	147.596	140.129	120.97	119.817	109.085	134.836	150.409			141.15	125.18	141.492
2287.66	249.2	217.217	238.721	227.809	260.711	264.383	212.469	159.384	248.896	190.354	238.09	205.381	272.481	174.891	240.9	182.754	216.402	238.29	171.658	281.477	243.319			126.708	112.906	116.517	132.239	116.316	108.969	114.313	134.249	150.844	140.022	171.016	109.894	109.001	135.816	147.118	139.196	120.732	121.033	110.275	133.688	150.497			140.078	125.173	141.491
2290.21	249.215	217.005	235.6	227.654	262.532	263.853	211.957	158.165	249.185	190.132	238.111	204.027	273.386	174.01	239.503	180.018	215.923	238.486	170.698	281.36	243.089			125.228	111.96	117.044	131.997	115.86	108.287	113.55	135.162	149.642	140.246	170.579	109.713	108.107	136.734	145.974	140.01	120.639	119.94	109.423	132.749	149.634			141.511	124.804	141.307
2292.75	249.485	217.235	236.133	226.084	261.441	263.935	211.293	158.67	251.058	190.079	238.454	204.639	272.289	173.673	238.711	180.296	216.642	237.109	171.231	281.592	242.612			125.346	113.16	115.852	132.002	117.081	108.15	113.681	135.387	149.732	139.019	170.299	109.092	108.18	138.012	146.338	139.877	122.343	119.744	109.757	132.843	150.393			141.901	123.907	140.13
2295.3	248.743	216.563	236.776	227.458	259.584	264.041	211.322	159.141	251.695	189.264	237.315	204.44	271.203	173.629	238.323	181.893	216.95	236.225	169.364	280.823	242.561			125.24	113.549	116.489	130.995	117.403	108.217	112.612	135.367	150.004	138.9	172.817	109.626	108.437	137.734	146.044	141.386	121.971	119.589	111.228	133.772	150.632			141.298	124.141	140.287
2297.85	248.654	215.773	237.51	227.362	259.448	264.473	211.16	159.28	251.331	190.017	236.113	205.208	271.692	173.931	237.201	182.781	217.202	235.756	169.41	281.484	242.91			124.928	113.508	116.75	130.763	117.597	108.102	113.301	135.316	149.874	138.419	173.306	110.765	108.016	137.88	146.388	140.777	121.076	118.598	110.572	134.306	150.492			140.646	124.656	140.226
2300.39	247.936	216.76	238.586	229.255	258.907	263.384	212.911	159.646	251.7	190.698	238.202	204.09	271.592	174.21	238.19	182.435	217.702	237.475	171.207	282.471	243.289			126.15	114.492	117.259	131.2	117.4	107.801	114.396	134.826	151.132	138.993	173.948	110.696	108.139	137.365	146.715	140.235	121.057	117.613	109.958	134.597	151.377			141.98	125.668	140.481
2302.94	249.129	216.92	237.184	227.785	259.159	264.021	212.384	159.802	251.558	188.578	237.873	203.454	271.269	173.065	238.045	182.626	218.17	236.81	170.938	282.824	242.117			125.117	113.309	116.765	132.2	117.141	108.88	113.405	134.09	150.525	138.425	172.569	110.058	109.187	138.092	147.272	141.022	120.679	117.792	110.256	133.66	151.783			140.939	125.576	140.894
2305.48	248.005	215.615	236.553	227.525	258.951	262.822	212.557	159.614	251.663	188.769	236.248	203.025	270.821	173.568	238.509	182.152	216.602	235.573	169.554	281.487	240.73			125.17	114.047	116.888	132.049	117.294	110.048	113.709	134.494	150.308	138.328	170.523	109.554	108.137	137.443	146.539	141.173	121.028	118.891	109.673	132.015	152.142			141.849	124.321	141.487
2308.03	249.001	216.962	237.39	227.273	258.449	261.398	213.177	161.471	251.351	189.67	237.922	202.787	272.03	173.859	238.72	181.397	218.036	236.512	171.299	283.461	241.418			125.752	114.887	116.575	133.001	118.711	108.966	115.335	135.817	151.196	140.412	170.751	110.168	108.298	138.509	147.083	141.526	122.021	120.455	110.504	134.306	150.247			141.433	125.237	140.854
2310.58	250.764	218.371	241.369	227.612	259.639	263.932	212.737	161.761	248.958	190.911	239.512	203.049	272.216	173.63	237.826	184.167	216.201	236.522	170.634	283.331	243.5			126.297	115.081	117.151	133.354	119.361	110.455	114.54	136.751	150.457	140.817	173.61	111.508	110.369	137.678	148.14	142.568	123.061	122.693	111.811	132.953	149.727			140.051	125.605	141.596
2313.12	252.389	217.675	241.275	227.057	259.628	263.868	212.266	161.339	247.789	190.906	237.677	202.152	270.651	175.09	239.738	185.033	216.317	239.623	170.844	283.704	243.8			126.374	114.135	117.627	131.317	116.782	110.471	113.116	134.726	150.155	142.288	174.605	109.974	109.136	138.014	147.062	141.548	122.355	121.843	111.837	133.995	150.648			140.818	127.653	141.519
2315.67	249.481	217.751	238.319	227.888	261.483	262.37	209.104	160.821	249.222	190.2	236.018	202.899	270.864	175.518	237.729	181.621	216.439	236.034	170.965	281.2	242.419			125.73	113.709	116.728	131.976	115.917	108.472	114.45	134.248	149.321	140.513	170.191	109.712	107.157	138.376	147.739	140.125	121.835	119.564	110.051	132.796	150.772			141.625	124.591	142.983
2318.22	246.656	218.444	235.497	229.42	260.093	260.2	213.69	162.036	250.197	189.619	237.851	203.264	269.988	173.519	237.084	179.684	215.111	238.311	169.558	281.11	239.367			126.337	114.826	116.746	132.54	117.921	109.865	115.343	135.417	151.677	138.965	168.107	110.512	109.782	137.607	148.774	140.855	122.215	118.847	110.539	133.588	150.593			144.435	125.299	141.979
2320.76	250.225	217.803	236.893	229.118	259.812	263.722	213.076	162.514	250.228	190.859	238.074	204.109	271.634	174.99	238.902	183.092	217.729	237.392	171.917	282.146	242.454			126.23	114.642	118.455	131.859	117.759	109.754	114.86	135.973	153.394	140.83	172.723	111.074	109.327	140.207	148.201	140.708	122.988	121.034	112.552	136.38	151.83			142.597	124.792	141.123
2323.31	248.216	220.17	237.735	228.192	260.366	263.671	213.123	163.101	252.167	191.205	239.357	205.408	271.212	175.174	240.013	181.848	218.149	239.855	171.546	284.184	242.697			126.415	114.457	118.442	133.544	118.972	110.823	115.61	136.464	153.743	139.402	172.566	113.044	110.561	136.772	147.016	141.571	123.742	120.401	113.481	134.227	151.631			144.125	125.428	141.431
2325.86	251.803	220.522	238.864	229.977	261.572	263.395	217.229	162.356	250.385	191.248	239.797	206.126	273.279	175.038	240.306	181.888	216.676	239.275	172.201	284.704	243.447			126.835	116.228	119.838	136.143	119.765	112.11	118.277	135.467	155.155	141.935	173.225	113.712	111.093	138.87	148.039	142.456	124.554	122.334	113.081	137.291	153.541			145.009	125.514	141.098
2328.4	252.573	220.503	239.114	229.317	264.024	264.699	219.548	165.23	255.73	193.273	240.144	205.213	273.6	175.836	241.702	182.572	219.566	240.039	173.528	287.817	244.323			128.099	117.851	120.909	135.159	118.491	112.823	117.515	136.218	156.263	143.781	174.4	113.797	111.618	141.542	149.271	143.96	125.16	121.395	114.319	137.97	153.459			146.826	129.331	144.314
2330.95	252.624	222.1	238.769	232.046	266.042	263.757	218.049	165.888	257.127	193.876	240.155	205.351	275.34	176.627	241.666	182.225	220.453	240.444	174.313	288.642	244.276			128.618	118.563	121.079	134.051	119.913	112.443	117.877	137.438	156.526	142.437	171.764	113.613	111.529	141.565	150.201	145.495	125.225	121.749	114.561	139.228	154.379			147.138	130.07	146.277
2333.5	252.132	221.147	240.681	230.342	265.193	264.425	216.558	163.798	256.54	193.716	240.485	205.462	275.417	175.992	242.726	181.635	219.416	240.295	173.007	288.58	244.803			127.95	117.245	120.675	133.696	120.273	111.282	117.782	137.546	154.337	142.853	172.636	113.252	111.817	141.253	151.118	145.299	125.053	121.389	114.407	140.171	155.074			147.661	128.79	144.153
2336.04	252.481	220.597	241.959	229.44	263.032	267.632	213.724	163.575	255.611	193.819	239.471	205.546	274.05	176.415	242.814	183.35	219.87	239.807	171.647	286.931	244.917			129.056	116.635	119.668	133.588	119.927	110.665	116.876	137.079	155.088	142.337	175.419	112.5	111.798	141.449	151.458	145.188	124.247	120.337	112.8	140.867	154.97			146.353	128.245	142.987
2338.59	252.921	220.024	241.831	231.092	263.629	266.649	214.79	165.51	257.853	193.824	240.933	207.757	273.957	176.354	242.269	186.203	218.804	240.251	173.037	287.321	246.201			129.741	117.557	119.491	134.435	120.941	111.135	117.602	138.24	155.895	142.672	175.592	113.895	111.921	142.31	151.813	146.002	125.251	121.619	113.017	140.901	154.955			145.007	128.951	144.526
2341.14	253.915	219.963	243.549	231.57	263.282	266.632	215.422	166.193	256.631	194.813	242.53	208.106	276.668	176.247	243.023	185.34	219.572	240.019	172.844	288.812	246.757			129.786	117.868	120.693	135.514	121.489	112.842	118.458	137.595	154.595	144.087	175.782	115.299	111.779	142.45	152.133	146.8	125.423	121.879	114.343	140.215	154.439			146.259	128.4	144.359
2343.68	255.153	220.257	241.885	232.359	263.013	269.146	215.688	165.317	253.309	194.046	240.065	206.828	277.713	176.567	243.908	185.676	220.086	240.82	172.449	290.508	246.409			129.124	117.575	121.079	136.474	121.437	113.345	117.678	137.714	154.722	143.612	176.791	115.126	111.697	142.025	152.29	146.761	125.43	121.794	114.344	140.815	153.893			147.644	127.213	144.67
2346.23	253.895	222.546	240.221	233.449	264.238	267.95	217.497	166.635	254.926	192.514	241.505	209.168	276.295	175.078	241.879	183.443	219.506	240.526	172.65	289.185	246.72			128.834	118.156	120.452	136.203	122.298	113.227	118.129	138.833	155.677	143.579	175.847	114.675	112.726	141.836	151.499	147.702	126.052	122.827	113.85	139.955	155.406			148.318	128.474	143.543
2348.78	254.631	221.307	240.457	232.461	265.802	267.559	216.426	166.454	252.473	194.722	242.535	207.813	276.641	176.138	243.733	185.676	219.854	241.577	173.861	290.704	247.552			130.487	118.174	120.782	137.649	123.572	114.204	118.847	136.611	157.209	143.97	177.401	114.773	112.697	143.998	152.936	148.093	125.726	123.6	115.794	138.631	155.204			148.213	129.012	143.77
2351.32	254.774	222.271	243.428	235.583	266.086	268.47	218.007	166.346	254.8	197.371	243.247	209.758	277.102	178.583	242.099	185.493	220.355	242.658	175.337	291.367	248.394			131.617	119.072	120.406	139.661	124.595	113.864	119.985	141.135	159.248	143.691	175.727	115.92	115.031	144.518	152.856	146.858	127.431	123.45	117.669	143.621	155.115			149.982	130.293	146.327
2353.87	257.779	222.745	243.988	237.357	267.828	269.525	220.071	167.852	257.605	196.681	245.77	210.361	277.055	177.681	245.153	185.433	219.625	242.373	174.554	293.047	251.297			130.343	119.915	122.283	137.381	122.649	114.833	120.41	140.626	160.235	147.553	177.642	119.337	114.08	146.657	155.277	149.864	128.321	122.938	117.125	145.961	156.734			148.951	130.789	147.001
2356.42	258.099	223.094	245.707	236.833	267.969	270.102	219.259	168.765	257.575	196.503	243.575	210.897	277.84	180.908	243.825	184.3	223.125	243.758	176.631	290.986	251.653			131.014	120.919	122.679	138.808	125.36	117.645	120.256	141.262	159.553	147.523	175.354	117.578	115.985	147.319	155.045	152.477	127.561	124.599	117.501	145.046	156.855			151.959	131.341	146.001
2358.96	259.205	223.946	246.826	238.831	269.605	272.916	220.729	171.046	258.957	197.689	243.776	210.848	281.691	181.559	247.312	187.839	223.315	243.842	176.428	293.78	252.832			134.49	120.473	124.177	142.373	127.974	118.852	122.449	141.83	160.717	147.998	181.553	119.784	117.368	150.566	159.265	153.32	130.961	125.538	119.96	146.079	159.554			152.221	131.454	148.186
2361.51	259.885	223.862	247.173	238.795	270.053	274.407	222.104	171.738	260.59	198.878	246.867	212.584	283.103	179.726	246.814	185.277	223.436	247.006	177.283	293.785	252.434			133.754	122.125	124.106	141.921	129.095	119.197	123.948	142.261	160.674	148.858	181.833	118.735	117.078	147.497	157.742	152.324	131.473	126.132	119.858	146.622	160.234			153.842	132.634	148.923
2364.05	260.053	224.796	246.758	238.67	271.983	275.366	222.863	170.91	261.733	200.323	246.416	214.524	282.096	181.411	247.106	187.382	224.362	247.345	176.674	294.541	254.573			133.342	123.038	125.7	142.114	129.194	119.925	123.69	142.926	162.047	150.193	183.967	119.842	117.138	148.205	158.231	152.068	131.459	126.9	120.954	148.821	160.908			154.384	133.825	149.676
2366.6	260.636	226.437	251.217	240.586	272.014	274.276	223.157	174.058	263.609	202.303	248.662	213.204	283.14	181.788	248.379	190.622	224.791	245.605	177.298	296.398	256.203			134.794	123.939	125.962	142.497	130.571	120.526	125.579	145.61	161.835	150.81	183.769	119.555	118.362	149.585	159.188	152.679	132.032	127.231	121.161	149.046	160.929			156.674	133.396	150.765
2369.15	263.435	228.048	252.928	241.989	272.606	276.427	224.919	175.407	264.161	202.54	250.044	214.844	282.483	183.12	249.649	193.618	227.315	246.775	178.423	298.913	257.481			137.087	125.016	126.417	143.429	131.793	122.48	125.813	145.699	162.468	152.086	186.005	120.781	119.792	152.544	160.672	155.261	133.831	128.844	122.739	151.286	161.989			155.825	133.934	151.931
2371.69	263.175	227.426	248.604	241.981	274.468	277.757	226.47	175.88	263.828	201.375	249.986	216.586	285.091	182.977	250.07	191.579	226.627	247.205	179.227	300.121	258.245			137.39	124.545	127.467	143.858	131.144	122.279	126.168	144.082	163.083	152.525	185.866	121.729	118.908	153.658	162.28	156.12	133.726	127.832	124.004	152.795	162.274			156.399	136.132	154.131
2374.24	263.584	229.503	248.8	242.267	276.1	276.962	225.925	177.034	264.413	202.242	250.572	216.751	286.909	183.126	251.704	190.237	227.908	248.707	179.206	299.503	258.345			137.022	124.714	126.794	145.131	130.465	121.89	127.225	145.231	165.482	151.907	182.427	122.102	119.91	152.346	162.772	156.448	133.241	127.848	124.023	152.534	163.419			157.964	136.336	154.029
2376.79	263.808	229.215	250.694	244.124	275.928	276.015	227.803	177.258	266.585	202.715	251.431	217.557	285.863	184.526	253.322	190.633	229.811	249.547	179.992	299.7	257.932			138.362	126.5	126.863	146.427	131.477	123.694	126.947	146.043	167.855	154.011	182.408	122.593	120.704	153.309	162.677	158.035	134.149	128.494	124.974	153.413	163.819			159.063	135.717	152.471
2379.33	264.884	229.156	252.75	243.976	276.299	276.976	226.233	176.653	268.489	204.187	252.028	217.833	287.589	184.932	253.058	189.49	231.501	249.674	180.683	300.118	257.717			139.463	127.226	127.204	147.981	132.487	125.585	128.008	146.483	166.432	154.838	184.674	122.877	121.895	153.921	163.593	159.239	135.295	129.635	126.198	154.543	163.573			159.52	137.712	154.089
2381.88	265.797	229.201	254.446	245.057	279.368	280.137	227.925	178.569	268.778	205.601	252.431	219.671	289.046	185.007	253.986	193.831	231.813	253.112	181.731	303.021	260.293			139.507	127.708	130.012	147.782	134.009	126.098	127.388	147.001	166.676	154.145	186.445	123.203	121.983	154.537	164.255	158.516	136.322	130.162	127.352	155.278	166.472			161.513	138.201	154.818
2384.43	267.907	232.535	253.868	246.982	278.85	279.827	228.423	180.674	269.855	207.677	252.395	219.821	288.513	186.804	255.159	195.429	231.117	251.809	181.92	303.936	263.239			139.586	128.065	128.342	147.711	135.474	125.534	129.204	147.194	168.489	154.795	187.397	124.533	121.688	155.554	165.869	159.596	137.71	130.764	126.8	155.742	166.068			161.572	137.591	155.563
2386.97	267.407	231.23	256.489	246.616	279.413	282.111	229.84	179.81	270.397	206.654	251.536	218.447	288.406	186.126	254.041	196.685	231.654	255.208	181.985	305.288	261.895			141.315	128.437	129.5	148.777	135.48	125.938	130.384	147.601	169.811	155.664	190.109	125.386	122.43	156.381	167.806	160.306	138.432	131.628	128.666	156.651	166.054			160.035	137.487	156.851
2389.52	268.584	233.96	254.014	246.959	279.905	280.777	229.275	181.313	269.113	207.501	252.845	220.399	290.117	185.83	256.84	194.01	231.134	252.873	181.806	304.039	261.446			140.635	130.548	130.597	148.309	133.352	126.905	129.022	149.734	167.824	156.728	189.347	125.134	122.991	156.747	165.177	158.514	138.759	129.501	127.514	157.342	167.776			161.833	139.91	157.445
2392.07	267.774	231.596	254.057	248.778	278.952	283.025	230.088	179.913	269.689	205.941	251.903	220.372	291.076	186.423	255.832	194.281	232.593	253.613	182.929	304.479	263.212			139.528	128.755	129.777	149.529	134.477	126.91	128.007	147.416	168.644	155.902	187.664	125.549	122.674	156.008	167.49	161.113	138.266	130.435	128.726	157.944	167.342			161.588	138.179	157.053
2394.61	267.268	231.823	255.081	248.413	280.081	282.306	229.825	181.094	271.743	209.584	254.129	219.72	290.253	187.279	257.246	195.291	232.54	253.687	183.893	305.375	263.822			141.752	131.151	130.455	150.651	135.06	127.303	129.77	148.303	169.029	157.438	188.3	125.815	123.604	157.083	168.238	159.919	138.76	130.487	128.876	158.396	167.459			162.205	140.866	159.479
2397.16	269.416	234.109	259.055	248.15	283.307	282.009	231.422	182.11	271.448	207.54	254.295	220.869	291.308	187.373	257.616	193.969	232.645	255.767	184.032	305.986	264.929			141.739	129.818	132.383	149.818	137.04	128.064	131.313	148.764	169.872	157.191	190.096	126.852	124.795	158.057	168.007	162.107	139.765	130.896	128.75	158.187	168.456			161.41	139.885	158.116
2399.71	268.561	235.965	259.034	249.427	284.764	282.214	232.228	183.183	271.251	209.41	255.043	221.177	291.416	186.763	258.029	194.654	234.219	256.102	183.53	305.749	263.929			143.277	130.487	132.245	151.086	138.747	128.153	131.565	150.602	171.085	158.641	189.611	128.094	125.564	157.737	168.979	162.734	140.486	131.17	129.217	159.031	169.198			165.609	141.32	158.523
2402.25	269.919	236.03	259.356	251.66	284.114	283.804	234.45	183.539	274.247	210.834	256.054	221.246	292.088	188.718	259.471	198.13	235.73	256.875	184.006	305.886	264.975			144.247	132.358	132.72	152.663	141.559	129.535	132.384	151.437	171.654	159.442	194.342	129.277	126.184	158.129	168.603	163.594	141.492	133.058	131.744	161.177	169.966			168.228	141.557	158.972
2404.8	269.913	234.622	259.875	252.44	283.546	285.958	234.216	183.012	275.93	210.643	256.426	221.717	293.572	189.386	260.139	200.533	236.249	256.277	185.553	306.572	266.295			143.801	132.188	134.395	151.868	140.573	129.255	131.658	150.968	171.316	160.107	199.071	127.87	125.927	160.871	170.181	165.411	140.812	132.026	133.278	164.245	170.971			166.069	142.256	161.14
2407.35	270.696	233.296	258.38	251.943	283.703	286.279	232.78	182.477	275.784	211.276	255.741	223.261	292.778	188.688	258.421	198.533	235.986	256.598	185.408	308.524	265.458			144.04	131.912	133.583	151.273	138.352	128.593	131.569	150.304	171.783	158.414	195.55	127.648	125.289	161.131	169.763	166.004	140.584	133.132	131.315	161.541	170.086			164.534	142.595	162.796
2409.89	271.311	235.585	259.274	252.861	282.294	285.812	233.563	183.757	277.462	211.049	255.551	223.145	293.396	188.418	257.943	196.201	236.832	257.443	185.005	309.457	265.854			143.83	133.332	133.262	152.367	140.074	128.995	133.126	151.698	171.937	157.986	191.953	128.967	125.743	161.472	170.444	164.882	141.244	133.208	130.765	160.836	168.922			166.317	141.838	160.637
2412.44	268.872	234.867	258.689	250.731	284.296	287.737	231.22	183.901	275.084	212.281	256.866	224.618	291.86	189.119	260.512	197.413	236.492	256.878	187.088	310.36	268.666			142.86	133.181	134.308	152.995	140.752	130.205	133.426	151.574	171.988	159.765	195.529	128.643	127.199	161.984	171.909	167.162	142.681	131.78	132.175	163.091	170.387			164.707	142.183	160.328
2414.99	269.456	235.216	258.9	250.401	286.254	287.424	231.743	184.069	272.637	210.194	258.797	223.296	291.904	189.568	260.253	197.196	235.794	257.497	186.93	308.887	267.536			142.712	131.861	135.183	152.93	139.52	130.465	133.256	149.706	173.913	159.949	197.2	129.191	126.526	162.982	170.762	167.035	141.266	132.491	133.331	162.13	170.939			165.686	145.061	163.094
2417.53	271.499	236.429	258.993	252.417	285.246	286.044	233.488	183.704	273.154	212.987	257.208	223.082	293.717	187.353	260.851	196.825	236.602	255.621	186.362	307.944	267.286			144.221	131.477	133.713	151.192	137.257	131.274	131.863	151.264	173.729	159.825	192.87	128.324	125.34	161.894	170.999	165.269	141.231	133.273	132.463	162.414	169.72			167.007	142.704	161.539
2420.08	270.334	233.965	258.688	253.455	282.62	287.411	234.253	185.559	273.236	211.862	257.045	223.931	293.793	186.55	258.057	198.083	235.719	257.491	186.981	309.094	266.119			142.262	132.374	132.895	153.197	140.287	129.403	133.357	151.139	172.029	160.049	192.383	128.985	126.851	161.325	169.924	165.593	142.042	134.118	132.272	162.122	170.557			166.09	143.812	160.052
2422.62	271.75	234.073	257.567	251.696	287.183	285.346	233.313	184.531	274.449	211.551	254.947	222.461	293.73	189.013	259.061	199.079	233.67	258.372	186.573	310.966	265.784			145.019	132.469	133.563	152.877	139.428	130.24	133.334	152.354	171.308	158.195	192.875	128.8	126.395	162.651	170.595	164.957	141.794	132.564	131.755	163.216	170.24			165.109	143.482	159.542
2425.17	271.614	236.352	258.751	253.713	285.622	288.939	233.628	187.59	275.615	213.552	256.792	223.912	294.195	188.733	260.146	196.702	235.942	258.382	186.937	310.737	265.985			144.479	133.011	134.663	152.603	140.454	131.591	133.96	152.032	174.91	160.13	193.892	129.334	128.716	162.63	171.177	164.491	142.788	132.377	132.853	162.406	169.818			165.894	144.72	161.954
2427.72	272.959	236.576	259.316	253.736	286.817	287.186	233.351	185.935	273.604	211.978	258.584	224.752	292.967	187.726	259.356	196.83	235.957	258.79	186.488	310.781	266.36			143.447	133.197	135.493	153.544	138.945	131.462	132.87	151.27	173.689	160.734	193.306	128.866	128.114	162.329	171.417	166.156	142.145	133.93	133.205	163.465	171.126			167.042	143.913	161.714
2430.26	274.308	235.645	259.116	253.052	286.135	285.82	233.506	184.502	277.43	212.544	258.059	225.01	292.148	188.644	260.971	197.739	235.812	258.618	185.941	312.279	268.156			143.7	133.023	132.915	153.416	140.12	131.924	133.708	151.656	171.847	159.886	192.667	129.501	126.948	163.81	171.441	167.211	142.192	135.061	133.524	162.73	170.506			167.046	143.646	160.945
2432.81	274.653	234.777	260.445	252.139	285.922	287.723	233.831	186.044	278.476	213.593	258.384	225.425	293.412	189.933	259.878	198.585	236.798	256.516	186.349	312.108	269.525			144.304	132.191	133.351	151.686	139.7	130.63	131.866	152.26	171.847	159.963	193.189	129.978	126.752	162.357	172.507	167.087	142.142	134.409	132.701	163.934	170.304			167.794	143.78	162.156
2435.36	273.8	235.595	261.741	251.693	285.903	288.981	234.216	187.005	277.428	213.021	258.819	224.47	293.96	190.021	259.227	200.086	237.74	256.006	184.999	311.548	267.888			144.749	132.547	134.132	150.985	139.842	129.88	132.335	151.082	172.454	159.331	195.291	128.965	126.833	161.945	172.686	166.927	142.288	133.608	131.15	162.166	170.703			166.426	144.187	162.312
2437.9	275.75	235.564	260.434	252.393	285.065	287.769	234.359	185.531	275.066	212.843	257.575	223.405	293.822	189.645	258.914	197.939	235.712	256.17	184.3	311.57	267.014			143.106	132.498	133.464	151.152	139.279	130.293	132.617	151.31	172.383	158.845	196.073	128.666	126.599	161.304	170.863	164.836	142.076	132.711	130.935	160.819	172.008			164.516	143.801	161.164
2440.45	274.158	235.835	257.747	251.993	283.898	285.68	231.771	182.06	274.255	212.082	255.62	223.655	292.117	188.06	259.472	195.062	234.755	255.207	183.431	311.207	265.815			141.432	130.572	133.845	150.189	137.622	130.697	131.949	149.908	171.733	158.564	194.768	127.374	126.521	159.366	169.323	163.384	141.053	131.721	131.438	160.55	170.231			164.319	142.925	160.738
2443	272.498	234.612	255.627	251.614	284.752	285.933	232.304	181.838	276.426	211.446	255.624	221.865	293.294	189.487	261.477	196.315	235.463	256.414	184.792	312.7	266.603			141.817	130.376	133.085	150.724	137.36	129.219	131.865	149.12	171.105	158.073	193.249	126.556	124.737	160.142	169.686	163.57	140.66	131.722	131.538	161.565	169.251			164.624	142.213	161.373
2445.54	273.147	234.282	257.812	251.503	285.01	285.07	230.887	183.381	274.456	210.357	255.397	220.8	291.201	188.125	260.759	197.113	234.945	256.281	184.425	310.579	265.246			142.671	130.766	132.333	151.277	137.539	128.06	131.713	148.546	169.866	157.125	189.106	126.091	124.289	159.661	168.852	164.923	139.753	131.935	130.59	159.427	168.144			163.346	142.659	159.654
2448.09	274.05	235.929	257.014	250.541	286.264	283.707	231.043	182.914	274.418	210.467	254.362	221.494	290.443	187.245	256.431	195.168	232.836	253.82	183.516	308.957	266.036			141.662	131.061	131.921	150.59	137.615	128.178	131.021	149.264	170.098	157.408	189.646	127.539	124.996	159.591	169.43	164.777	140.016	130.074	130.595	157.73	168.49			163.34	141.407	159.917
2450.64	271.603	234.965	257.263	252.792	282.957	281.153	231.171	180.988	272.183	211.125	255.885	219.874	289.032	188.873	259.285	193.999	234.427	256.135	183.293	310.897	265.549			141.621	130.188	133.312	151.56	136.489	128.298	130.172	149.647	170.399	159.154	191.144	126.985	124.454	159.688	167.708	162.994	140.332	130.863	130.835	157.869	169.113			163.479	142.814	160.307
2453.18	269.52	234.153	255.365	249.675	283.191	285.958	229.617	181.324	271.182	209.821	257.15	221.83	290.673	187.565	257.146	194.646	233.821	256.517	183.681	310.452	263.189			140.947	128.651	134.127	148.986	134.66	126.433	129.898	147.969	171.441	158.996	190.101	125.295	122.851	156.978	169.171	162.735	138.23	130.255	128.695	157.556	167.312			161.529	142.825	158.436
2455.73	270.919	234.327	257.682	250.32	281.995	284.432	231.923	181.614	273.564	210.19	256.726	220.362	291.791	187.719	257.75	193.234	234.755	257.504	184.208	311.337	264.76			141.026	130.912	131.882	150.355	137.611	127.306	128.873	150.612	170.309	157.185	189.849	127.74	124.449	159.2	168.632	161.249	138.748	130.25	129.506	158.852	167.613			162.043	141.953	158.967
2458.28	270.279	233.865	257.175	250.09	281.338	284.756	230.886	179.696	273.453	209.64	255.497	219.298	288.864	187.479	257.653	194.958	236.632	255.561	184.838	309.742	263.465			141.616	130.15	132.283	150.008	137.961	126.89	130.396	149.25	169.362	159.559	194.125	126.447	123.416	159.116	167.302	163.644	138.61	131.005	129.735	159.4	167.293			162.323	140.688	158.657
2460.82	270.12	233.973	253.754	248.783	282.867	284.288	229.248	179.696	271.731	209.255	253.942	219.933	288.928	185.822	255.956	194.708	233.546	254.871	182.37	308.04	261.71			140.071	128.582	132.299	148.175	136.332	125.893	129.847	147.037	169.354	158.218	192.947	126.045	122.64	157.475	165.992	161.847	138.121	129.757	127.766	156.707	167.284			161.504	142.856	158.988
2463.37	270.564	232.78	253.698	248.909	281.431	281.746	230.239	181.228	270.602	208.871	254.53	220.903	289.79	187.262	255.534	195.227	233.124	255.426	183.357	305.962	262.216			140.68	128.121	130.899	147.622	136.03	125.898	129.416	147.539	169.388	156.975	188.837	125.854	123.985	156.852	166.604	160.296	136.856	129.87	127.437	155.65	166.51			161.733	140.595	159.098
2465.92	269.734	232.902	253.572	249.275	279.269	282.395	229.881	179.943	271.461	206.989	254.391	219.192	289.303	187.892	254.971	195.648	233.826	252.468	184.588	307.606	262.28			139.453	127.947	130.316	147.426	134.709	125.24	129.203	147.112	169.66	155.857	188.856	125.314	123.817	157.013	165.941	160.086	136.445	130.994	127.554	155.36	165.394			161.477	139.946	157.617
2468.46	268.345	231.843	254.026	248.391	279.217	282.475	229.677	178.759	271.245	206.287	254.738	217.674	287.748	186.235	254.2	195.551	233.063	251.71	183.856	306.628	260.733			139.941	127.112	129.727	146.734	132.324	123.771	128.774	146.543	169.021	155.396	188.494	124.346	122.773	156.012	164.572	159.759	136.023	130.322	126.43	154.755	165.579			159.991	139.31	158.111
2471.01	268.561	231.462	254.054	247.964	280	281.176	227.749	178.256	270.922	206.714	254.4	218.048	287.393	185.46	253.753	192.24	232.545	252.573	183.21	307.24	261.68			139.752	127.155	129.7	146.869	132.433	124.249	127.207	146.561	168.666	155.953	186.367	124.925	121.987	156.273	163.396	159.736	136.561	128.056	124.79	155.38	164.852			159.348	138.627	156.989
2473.56	268.525	232.728	253.71	248.553	278.433	279.534	227.234	178.164	269.802	206.022	254.464	216.48	286.687	184.942	253.537	192.966	231.041	250.198	181.953	305.931	260.736			138.812	126.058	129.109	147.293	132.444	124.479	125.765	146.253	167.255	154.403	184.654	123.844	122.577	154.162	164.579	159.174	136.11	128.605	124.705	153.813	164.591			159.324	138.057	155.823
2476.1	266.993	230.544	253.17	246.428	277.975	278.177	227.475	177.547	269.266	206.478	252.053	216.892	285.886	185.781	254.446	191.065	230.711	250.932	181.962	304.462	260.457			137.885	126.895	128.193	146.672	132.145	123.419	126.582	145.441	166.69	153.721	185.782	122.847	121.026	154.093	162.77	159.312	135.543	127.771	124.583	153.797	163.987			160.874	136.866	155.04
2478.65	265.726	231.162	252.522	246.006	276.669	279.807	226.686	178.131	269.152	206.173	251.703	219.117	286.606	184.266	252.687	191.353	230.814	251.903	181.903	307.505	261.216			138.022	126.313	127.823	147.46	133.351	124.179	128.479	143.378	167.04	152.943	185.148	124.478	121.747	155.212	162.619	158.582	134.559	128.345	126.901	154.5	166.647			157.823	138.33	155.4
2481.19	267.167	228.279	251.805	243.506	276.604	279.056	224.693	176.479	270.023	205.881	251.583	216.626	284.241	183.831	253.172	191.036	232.168	250.061	181.307	305.535	259.097			138.728	125.983	127.696	146.409	132.362	122.544	124.709	145.018	166.038	153.147	187.445	122.39	122.044	153.924	162.262	157.884	134.702	127.368	126.012	151.263	164.099			158.632	139.411	154.889
2483.74	265.997	229.612	252.452	245.956	275.284	274.955	225.345	177.364	269.595	205.693	249.799	216.374	286.24	183.19	250.542	189.486	231.326	249.407	181.465	304.709	257.82			137.041	124.697	127.328	145.164	131.102	121.884	125.831	145.59	166.182	151.733	183.881	123.538	119.632	153.871	163.386	157.074	134.746	126.337	125.08	152.292	164.673			157.735	137.214	155.998
2486.29	265.394	229.682	252.448	243.094	275.92	276.712	227.362	177.186	267.195	206.229	250.86	216.767	284.336	183.953	251.878	191.006	231.508	251.782	180.069	305.177	258.161			137.028	125.253	127.568	145.672	131.557	123.995	126.652	145.628	166.379	151.334	184.693	123.754	119.437	152.653	161.771	158.054	135.788	126.633	123.686	151.777	163.044			159.048	136.988	154.933
2488.83	266.326	229.492	252.609	242.812	276.819	279.059	225.535	175.876	266.84	204.321	249.993	216.65	283.147	184.614	251.918	193.795	229.845	252.95	180.713	304.992	258.011			137.687	125.576	127.3	145.153	131.69	123.441	125.871	145.724	165.31	152.115	186.486	123.385	120.695	152.647	161.719	158.297	135.113	126.535	124.994	150.983	163.11			158.716	138.2	154.586
2491.38	263.266	228.782	251.698	243.721	275.336	277.925	226.364	177.116	267.026	204.021	249.443	217.965	283.933	183.078	251.237	192.245	229.37	250.103	178.598	304.81	257.604			136.789	125.385	127.294	145.89	130.16	122.882	125.088	144.734	165.943	152.808	185.284	122.894	121.245	151.854	160.563	158.169	134.376	125.741	123.9	151.041	162.669			157.27	137.533	154.016
2493.93	263.6	229.349	250.318	243.911	274.125	276.955	225.033	177.05	266.396	203.595	249.596	217.715	283.332	183.457	250.396	192.112	228.678	250.372	178.363	303.211	257.75			135.997	125.381	126.949	145.561	130.584	122.377	124.663	143.249	165.464	152.436	184.511	122.236	121.19	152.219	160.238	156.673	134.286	127.321	123.674	151.328	161.591			155.686	135.918	153.702
2496.47	264.072	229	249.516	242.603	273.108	274.771	224.744	175.159	266.53	202.422	248.368	215.101	281.428	182.907	249.231	190.219	227.811	250.148	178.059	301.588	255.621			135.845	124.568	126.237	144.038	129.431	121.782	123.634	142.39	164.262	151.218	183.065	123.017	120.89	151.646	160.267	155.251	132.863	126.963	122.924	150.467	161.941			155.193	134.998	153.558
2499.02	262.816	227.577	249.26	242.756	272.414	274.847	224.136	175.41	267.713	202.492	249.164	215.406	280.322	182.448	248.553	189.286	228.351	248.505	177.937	302.645	254.995			134.833	124.275	126.867	144.477	131.638	123.36	124.929	143.073	165.456	151.137	181.563	123.118	120.762	151.103	160.358	154.716	132.527	126.94	122.431	150.259	161.949			156.767	135.815	153.905
2501.57	262.992	227.437	251.375	243.035	271.885	274.976	224.899	176.903	267.358	204.583	248.068	215.886	281.14	182.505	248.081	188.575	228.957	249.263	176.87	301.483	256.378			135.853	123.946	128.519	144.183	131.784	122.301	125.818	144.1	165.682	151.716	185.15	122.365	120.266	152.287	161.892	153.711	131.766	128.126	123.138	149.28	162.333			156.828	135.562	151.994
2504.11	262.126	226.283	248.917	242.586	274.672	275.301	224.158	174.543	265.989	203.228	247.54	215.349	279.232	182.694	249.066	189.642	228.018	245.618	177.119	300.206	254.723			135.772	123.648	128.21	145.935	131.474	121.917	125.048	143.758	164.371	152.206	183.946	122.377	121.048	151.519	160.239	154.396	132.59	127.56	121.844	151.852	161.446			156.731	135.762	151.931
2506.66	262.734	227.412	249.709	242.41	269.339	276.23	223.842	176.647	267.175	202.18	247.648	212.78	281.077	183.462	248.649	190.394	229.627	247.253	178.145	300.084	257.184			135.219	123.097	127.187	144.884	131.061	121.05	123.395	141.725	163.97	151.789	186.728	122.052	119.528	152.077	162.2	155.821	132.812	127.277	124.174	151.64	162.194			156.168	136.515	152.378
2509.21	260.457	227.688	248.757	239.734	270.606	273.664	220.882	174.853	268.29	204.335	246.302	212.722	278.832	182.055	247.695	190.485	230.056	245.973	177.518	299.59	254.831			135.78	123.408	125.2	142.422	128.851	121.902	123.223	141.311	162.44	151.364	182.568	122.445	118.607	151.286	161.656	156.323	131.974	126.696	122.347	149.912	161.762			154.969	135.695	153.809
2511.75	260.862	227.019	250.193	243.847	272.163	274.06	223.777	175.089	266.544	203.265	245.762	213.634	278.209	182.554	246.549	189.074	227.775	247.271	178.383	301.128	254.103			137.596	124.356	126.25	142.677	129.717	120.983	124.784	142.499	164.218	149.292	182.618	121.062	119.863	151.186	160.672	154.742	132.186	125.815	121.885	149.907	161.005			156.155	135.072	150.84
2514.3	263.329	225.834	248.88	241.788	272.535	275.482	221.747	173.987	264.106	202.775	248.464	213.746	279.581	182.335	249.471	188.225	227.594	246.099	177.695	301.573	252.698			135.984	124.13	126.398	142.296	131.533	120.525	124.567	142.907	163.847	151.621	184.041	121.973	119.202	151.028	160.501	155.477	132.983	127.445	123.237	149.559	161.633			156.179	135.209	152.023
2516.85	261.484	225.618	248.466	240.623	270.517	275.018	221.498	173.61	264.23	202.285	247.803	212.275	278.457	181.471	247.463	190.118	227.413	246.739	178.007	300.049	254.026			134.822	123.003	125.933	142.255	128.82	120.335	123.443	140.487	164.531	150.664	185.32	121.217	119.89	150.837	159.661	154.564	130.916	126.69	123.209	150.5	161.656			155.498	136.21	152.561
2519.39	260.775	225.751	248.577	241.536	270.55	273.706	222.258	174.304	264.777	202.61	247.508	212.143	278.727	180.68	245.455	187.869	227.117	246.604	177.471	299.704	253.46			134.315	122.49	124.497	142.004	128.448	120.531	123.131	140.445	162.671	148.224	181.513	120.957	119.285	150.585	159.425	154.491	130.596	126.085	122.187	149.403	161.32			154.519	135.134	152.336
2521.94	259.486	226.119	247.716	240.348	268.235	270.673	221.405	173.299	263.721	202.705	247.732	212.324	278.706	180.944	245.814	185.795	225.163	245.737	177.941	298.716	253.144			133.139	121.566	123.739	141.758	127.386	119.976	122.893	140.746	162.773	148.671	179.885	120.318	119.15	149.625	159.154	154.476	130.293	124.997	120.649	147.437	160.544			154.628	134.7	150.976
2524.49	260.947	226.906	247.185	241.832	268.293	271.356	220.898	173.463	263.037	202.882	246.077	212.813	278.732	181.258	246.246	185.561	224.622	245.219	177.135	300.443	251.766			133.743	122.406	123.968	142.215	127.061	119.331	124.022	140.84	162.272	150.501	179.95	121.158	118.409	149.36	159.568	154.721	130.087	125.642	121.306	147.085	161.206			154.321	134.433	150.674
2527.03	261.907	226.822	246.794	239.939	269.407	270.327	221.749	173.764	263.652	203.182	245.835	213.948	278.71	180.966	245.873	185.822	225.534	246.228	176.728	299.995	253.371			133.889	121.403	123.967	143.413	127.417	121.382	123.018	141.591	162.472	149.61	178.703	120.681	119.298	149.617	160.089	154.232	131.727	125.367	121.936	147.466	161			154.181	134.454	149.93
2529.58	263.907	225.554	245.881	240.878	268.012	271.694	220.61	174.549	264.218	203.723	246.233	213.342	278.801	182.154	246.212	186.877	226.786	246.145	177.179	301.437	252.967			134.18	122.579	124.385	142.541	127.299	120.228	122.543	143.421	162.661	148.871	180.471	120.611	119.289	149.624	159.218	155.048	131.567	125.438	122.451	147.73	160.779			153.402	133.5	150.746
2532.13	264.735	226.168	247.208	241.907	270.06	272.993	221.836	175.071	264.38	203.597	247.43	214.341	277.475	184.118	247.157	191.145	226.632	245.32	180.041	301.901	255.329			133.263	122.532	124.722	142.135	128.725	119.716	122.996	142.276	164.883	150.387	179.596	121.963	119.479	148.381	158.232	154.515	129.32	125.229	121.15	148.153	160.926			154.573	134.842	152.836
2534.67	262.759	225.783	246.526	241.431	269.434	271.701	223.854	175.755	263.971	200.657	247.566	213.509	277.708	180.735	247.167	187.45	224.864	246.009	178.876	299.468	253.747			134.327	122.303	124.688	141.972	126.744	119.59	122.647	140.65	163.549	148.381	179.094	119.603	119.475	149.35	158.867	153.589	130.956	123.185	121.748	148.409	159.63			154.131	133.52	149.626
2537.22	262.242	226.362	247.696	243.392	270.178	273.652	222.669	175.13	264.906	203.737	246.054	213.437	277.609	180.174	245.834	189.435	226.148	245.107	178.998	301.255	252.351			133.758	121.434	124.526	141.743	126.437	119.392	122.564	140.702	163.866	149.597	178.669	120.688	118.924	150.304	158.491	154.859	130.755	125.829	122.099	146.438	160.509			154.008	133.242	151.265
2539.76	264.412	227.926	249.618	243.642	269.67	273.887	224.317	176.083	266.949	204.513	247.206	215.323	278.808	181.71	247.843	190.75	226.902	248.285	177.936	301.191	254.223			134.866	122.93	125.311	142.56	128.446	120.54	123.118	140.787	163.692	150.926	179.025	121.408	119.967	151.321	159.179	155.318	132.155	127.005	122.321	147.012	160.246			155.458	133.61	150.399
2542.31	264.03	227.263	249.212	242.166	270.682	272.144	224.584	175.224	264.813	205.208	247.891	214.667	278.957	183.027	247.74	189.836	226.981	248.271	179.311	300.859	255.623			134.715	122.852	124.85	143.403	128.869	120.464	123.913	141.82	164.706	150.502	182.073	122.08	120.079	150.619	158.969	154.602	131.693	126.915	122.72	147.694	159.573			155.395	133.788	151.221
2544.86	264.31	228.979	249.852	244.436	272.563	273.175	224.114	177.012	265.339	204.923	247.649	214.764	279.628	183.666	248.033	188.826	227.373	248.455	178.407	302.629	255.453			135.186	123.962	126.457	143.091	128.033	120.392	123.911	142.603	164.306	150.493	182.84	122.336	120.137	150.388	158.978	153.973	131.99	125.342	122.393	147.764	160.365			156.154	134.507	152.088
2547.4	264.967	229.192	249.468	244.702	273.196	274.991	224.05	177.793	267.933	205.684	247.666	216.049	278.837	183.635	246.696	191.169	227.888	247.974	178.263	303.989	256.157			134.72	123.758	125.928	142.948	127.493	119.245	122.345	142.005	163.662	150.428	181.099	122.7	119.777	150.272	158.828	154.742	131.071	125.85	122.789	148.603	160.667			155.85	133.983	152.332
2549.95	266.404	229.89	252.181	245.229	272.855	276.28	225.129	178.902	267.252	206.277	249.003	216.545	279.703	183.195	246.916	192.411	228.16	248.596	179.26	303.098	256.954			134.457	124.688	123.988	144.723	129.331	120.753	123.779	142.129	164.29	151.705	180.583	122.651	119.731	149.512	158.377	154.658	131.119	126.94	122.355	148.585	161.598			156.325	133.925	151.681
2552.5	266.024	230.527	253.249	246.673	273.074	275.732	226.897	177.559	266.193	207.046	249.991	216.499	279.07	183.467	249.5	191.953	226.76	249.375	179.171	303.809	257.429			135.227	124.956	125.442	143.897	130.803	122.883	125.604	142.625	165.715	151.741	184.495	123.833	121.951	150.703	159.383	153.856	132.819	127.213	122.727	149.732	162.479			158.133	134.865	151.87
2555.04	266.6	230.668	254.145	245.087	275.663	278.836	226.253	178.348	266.698	207.365	250.606	217.59	281.094	184.998	250.502	193.028	231.252	251.128	179.907	306.421	255.081			134.67	123.204	127.752	145.319	131.29	122.471	123.956	143.428	166.303	153.71	187.345	123.124	120.98	150.92	160.758	154.503	132.989	126.942	124.536	150.837	162.699			156.919	137.316	152.883
2557.59	264.968	231.39	253.596	246.983	274.49	277.987	226.67	178.147	268.518	209.395	250.537	217.39	281.724	184.833	251.089	191.988	228.363	249.641	180.083	303.526	255.978			135.601	123.481	126.006	141.846	128.327	120.545	124.102	142.294	165.433	152.911	183.427	121.996	121.47	151.401	159.034	155.355	130.692	126.325	123.583	151.937	160.982			154.604	134.828	153.16
2560.14	267.466	231.093	252.139	246.622	273.708	277.621	226.91	179.068	269.957	208.752	251.303	220.349	283.747	187.589	252.22	191.429	231.434	250.943	181.716	306.328	258.572			135.868	123.983	126.554	144.995	130.457	121.561	125.62	144.175	167.01	149.361	182.243	123.185	120.749	149.368	160.207	155.507	131.594	126.193	122.754	149.73	161.789			158.712	135.643	152.476
2562.68	267.354	233.604	255.303	248.558	276.688	281.78	228.195	180.229	273.308	208.586	251.838	219.875	285.179	187.759	254.077	195.192	233.774	253.519	183.749	306.828	258.768			136.934	124.027	125.971	144.531	130.727	122.179	125.955	145.229	166.103	152.696	186.991	123.261	121.983	152.21	161.427	157.396	132.694	128.472	124.448	149.766	162.012			156.413	134.506	153.88
2565.23	267.949	232.915	255.824	249.225	276.682	282.594	229.677	180.976	273.284	207.286	252.171	220.385	282.685	187.596	252.401	195.37	233.031	252.995	184.286	308.804	260.63			136.318	123.81	128.199	144.139	129.695	121.327	125.103	143.471	166.329	153.092	187.626	123.5	121.833	151.325	160.36	156.305	132.263	127.103	122.772	149.559	162.415			157.85	135.381	154.775
2567.78	268.718	233.853	257.259	249.544	275.45	281.823	229.297	180.957	271.729	209.177	253.998	220.896	284.529	188.17	252.962	192.801	234.435	254.726	183.698	308.095	260.996			136.678	124.453	126.336	145.106	129.885	121.484	124.591	143.512	166.922	152.142	184.516	123.016	122.209	150.924	161.881	157.368	132.959	128.197	122.526	149.592	164.643			158.027	135.473	153.937
2570.32	269.359	234.285	256.499	249.961	277.408	281.65	229.664	182.237	270.207	210.898	253.433	222.379	284.771	188.388	252.11	194.356	235.724	254.137	182.346	308.962	260.313			137.004	123.74	127.351	145.615	130.421	122.149	124.79	144.056	166.568	152.307	184.899	123.549	122.32	150.899	162.723	157.758	133.83	127.515	123.303	149.281	162.703			157.729	136.177	153.361
2572.87	269.599	235.184	256.9	251.749	279.273	283.475	230.289	182.967	271.756	211.936	252.911	222.062	286.349	188.316	253.032	194.168	235.311	253.798	183.521	309.606	260.299			135.698	123.257	127.061	145.964	130.255	122.286	124.775	144.508	167.88	152.299	186.293	124.4	122.97	152.276	161.196	156.499	133.448	127.959	123.835	150.465	162.658			158.302	136.33	154.394
2575.42	268.907	235.227	259.307	253.918	280.756	285.405	231.308	182.417	272.514	211.72	253.888	224.986	287.664	189.224	254.243	192.848	235.555	254.823	184.446	311.73	261.689			135.072	123.901	126.168	145.626	130.885	122.542	126.027	144.314	167.303	151.882	186.447	125.41	122.138	151.739	159.978	157.591	133.528	128.862	123.709	150.295	163.198			157.501	137.289	154.264
2577.96	271.917	235.643	260.156	252.959	279.54	284.928	233.903	182.317	273.132	212.025	253.74	227.408	288.055	188.886	255.664	195.582	238.535	256.308	184.901	312.432	262.416			135.974	124.156	126.428	146.351	129.996	122.643	123.731	145.119	168.722	152.291	185.172	125.017	122.199	152.639	162.647	157.05	133.657	129.479	123.707	151.218	163.623			158.383	136.699	154.645
2580.51	273.513	236.59	260.451	255.451	280.118	286.595	233.328	182.724	275.675	213.238	253.356	228.031	287.507	191.631	255.084	194.881	237.392	259.363	183.602	311.982	262.731			136.738	124.895	126.022	144.714	128.262	121.691	125.367	143.614	168.668	153.251	184.695	125.107	122.028	153.06	162.841	157.713	132.397	128.552	123.931	150.219	164.714			158.186	134.83	155.451
2583.06	270.582	239.623	261.976	257.452	284.009	286.977	233.819	185.716	275.813	214.551	257.076	230.047	287.745	191.264	255.786	195.703	239.389	257.077	186.1	318.567	262.545			137.27	124.814	129.594	146.469	128.03	121.947	125.271	144.679	168.413	152.743	184.789	124.723	122.656	154.512	161.185	158.089	132.586	128.93	123.8	149.463	164.894			159.129	136.147	154.658
2585.6	272.781	238.285	264.681	255.283	285.257	288.415	234.537	186.79	277.259	216.742	259.108	230.143	289.439	192.379	257.161	195.876	241.198	258.075	188.236	314.469	265.167			137.788	124.599	127.601	146.62	127.997	123.897	124.997	143.871	169.711	153.063	184.617	123.49	122.611	152.495	162.534	158.367	132.823	128.281	122.858	148.508	163.757			158.944	136.532	155.094
2588.15	273.138	241.209	262.855	258.743	286.94	289.864	233.226	187.79	279.097	217.052	257.433	231.115	289.397	191.235	257.817	197.196	241.181	260.963	188.328	316.123	266.559			136.34	124.927	126.912	145.669	129.847	122.572	125.165	143.635	170.571	153.16	185.878	123.79	123.723	152.831	161.535	157.924	133.506	128.872	123.596	150.431	165.258			159.567	136.075	155.214
2590.7	272.763	240.994	265.501	262.2	287.639	292.34	234.334	189.432	279.652	217.517	257.549	232.494	289.98	191.34	257.394	197.852	241.127	261.123	187.435	316.849	266.308			136.268	123.517	127.746	145.746	131.282	122.77	124.332	143.848	171.778	153.512	186.129	124.653	122.958	152.824	161.981	158.063	134.408	130.53	124.119	150.536	165.255			159.783	136.516	155.72
2593.24	272.899	241.563	265.571	261.903	287.58	293.642	235.566	188.257	282.037	217.839	259.383	232.377	291.463	192.929	258.46	198.769	242.598	262.099	187.859	318.806	267.453			137.276	124.717	127.394	146.437	131.953	122.896	126.175	145.208	171.224	154.417	186.978	126.274	123.922	152.774	162.335	158.109	133.894	131.148	124.476	149.819	165.937			159.438	136.505	156.557
2595.79	273.893	240.303	263.905	260.567	286.643	293.34	236.346	188.494	281.707	218.033	258.901	232.34	292.6	193.18	258.802	199.155	243.133	262.247	188.724	317.781	267.5			136.697	124.348	128.032	146.291	130.076	122.205	126.454	144.497	171.033	154.285	189.317	125.626	123.612	153.773	162.641	158.83	132.405	129.417	123.441	148.947	165.636			158.482	135.761	156.369
2598.34	274.662	240.655	267.354	260.159	288.706	293.86	237.082	189.123	280.438	218.662	260.448	234.323	293.865	194.743	260.387	200.222	243.975	264.431	190.134	319.503	269.09			137.305	123.003	128.991	145.92	129.081	122.289	126.183	144.159	170.708	155.158	186.902	124.362	123.55	152.619	162.382	161.112	132.954	129.083	123.079	148.827	166.393			159.496	136.647	155.265
2600.88	276.635	242.318	267.71	263.756	290.239	293.112	239.338	190.214	281.248	219.723	261.837	235.322	294.325	194.471	260.7	199.667	244.522	264.272	190.27	320.906	270.182			137.934	124.141	126.927	146.888	130.821	122.411	125.828	145.534	172.655	154.697	187.501	125.525	124.035	151.532	162.065	159.309	135.049	130.72	124.573	150.561	166.441			159.432	137.575	156.288
2603.43	277.273	244.627	267.792	265.097	288.967	294.925	239.631	190.897	283.068	221.966	262.477	236.523	295.128	195.365	261.394	199.109	244.796	263.347	190.676	323.116	271.198			136.313	123.866	127.74	147.245	129.38	121.444	126.342	145.914	172.823	153.271	189.338	125.187	123.823	153.084	163.549	157.816	134.867	129.268	123.301	150.716	165.436			158.579	136.814	157.18
2605.97	278.719	243.129	268.816	265.836	291.66	296.956	239.032	189.883	283.513	223.306	262.698	239.183	297.395	197.418	262.115	199.941	246.385	267.393	191.387	324.314	270.287			136.886	123.106	127.443	146.982	128.941	122.758	124.725	146.168	173.331	155.826	186.646	125.403	123.65	153.165	162.875	159.893	135.031	129.325	124.107	150.091	165.943			161.656	137.764	156.825
2608.52	279.485	245.967	270.929	264.639	291.789	298.076	239.347	191.994	284.084	223.242	267.428	238.674	296.767	197.263	263.362	200.564	246.698	269.349	191.971	323.423	272.352			136.915	123.935	127.384	147.456	130.992	123.591	124.593	145.751	174.891	155.647	185.642	126.573	125.122	152.291	163.581	160.14	134.583	130.639	125.027	150.492	166.926			160.917	136.565	156.45
2611.07	279.808	246.628	272.459	267.005	293.464	299.806	240.777	192.779	285.332	223.652	265.392	239.407	297.387	198.043	263.346	202.082	249.572	269.851	193.374	326.991	271.534			137.042	124.352	127.735	148.639	129.43	123.39	126.6	146.393	175.408	156.747	186.88	126.118	125.417	155.105	163.1	159.886	134.427	131.23	124.24	150.286	166.973			161.101	137.404	157.391
2613.61	282.107	247.285	272.931	267.397	293.378	300.674	242.066	192.596	286.898	224.123	266.496	239.666	297.878	199.138	264.048	202.597	249.73	271.633	193.535	326.753	272.107			137.527	124.99	129.315	149.973	131.678	123.25	128.034	148.305	174.514	156.629	187.126	126.16	125.431	155.072	163.038	159.714	134.659	131.623	124.889	150.901	167.845			161.324	138.121	158.131
2616.16	283.501	246.925	273.399	269.634	293.423	300.723	242.257	193.12	287.711	226.122	267.158	240.619	296.538	199.229	266.559	203.801	250.638	271.078	194.847	328.176	273.904			138.178	125.657	129.861	149.532	133.769	124.391	129.196	147.22	175.262	156.38	188.881	127.019	126.059	154.929	163.022	160.35	135.456	132.914	126.165	150.841	169.222			163.204	138.142	157.897
2618.71	284.285	247.461	273.242	269.454	295.615	302.005	244.402	193.566	290.667	228	268.281	240.586	298.423	199.817	265.631	205.378	251.787	272.362	195.664	329.278	273.741			139.161	125.228	129.453	150.276	132.562	125.004	128.903	147.444	175.04	158.236	191.541	127.269	126.142	155.966	164.609	162.209	135.709	133.543	127.464	152.696	169.216			162.681	138.948	159.932
2621.25	283.36	248.919	272.515	268.094	296.306	303.219	245.857	194.745	288.895	225.601	267.822	239.281	297.987	199.572	267.377	206.488	252.539	272.859	194.738	328.05	273.783			137.659	124.429	129.802	149.922	130.817	124.122	127.868	147.257	174.23	158.381	191.953	127.137	125.561	155.89	165.32	164.143	136.018	133.229	125.629	151.416	168.771			161.826	138.253	159.925
2623.8	285.618	249.965	274.289	269.996	299.242	304.478	245.859	193.703	289.539	227.192	267.893	240.024	297.077	200.963	268.877	207.079	250.894	272.79	196.213	329.748	274.07			139.011	126.854	129.548	150.35	131.786	123.95	128.696	147.507	174.919	157.359	188.92	127.915	125.669	155.283	165.269	162.754	136.328	132.646	125.986	151.803	169.878			162.621	138.459	160.586
2626.35	288.382	249.28	274.625	272.393	296.595	303.06	244.039	193.548	290.381	226.449	267.174	241.184	297.347	201.547	268.177	208.326	253.293	274.676	197.046	329.488	276.856			139.948	126.992	128.81	150.145	131.678	124.884	128.373	149.794	174.639	157.508	189.334	127.503	126.117	154.987	166.444	164.788	137.227	133.138	127.013	153.005	169.767			163.192	138.675	158.331
2628.89	284.658	249.684	277.644	270.862	297.603	304.372	244.874	193.202	287.603	225.689	266.536	239.463	297.012	200.998	266.693	208.543	252.245	274.317	198.483	327.49	276.96			139.015	125.343	130.169	148.453	129.884	123.136	127.235	146.82	175.234	160.036	191.065	126.521	126.49	154.567	165.893	162.828	135.947	133.816	125.772	152.219	168.578			161.722	138.861	159.506
2631.44	286.366	250.309	275.662	270.882	298.032	305.949	244.12	194.87	289.614	225.494	269.799	238.759	300.531	201.528	269.168	207.566	255.012	274.206	197.814	331.76	277.659			138.858	125.864	129.85	150.591	131.985	124.101	127.03	147.657	176.435	158.086	190.102	126.97	126.261	156.258	166.318	161.715	135.36	133.854	125.941	152.147	168.952			162.839	137.122	159.317
2633.99	285.856	250.388	273.547	270.058	296.118	305.919	244.96	193.881	288.786	226.391	268.395	239.679	298.662	201.169	267.061	207.128	253.266	273.867	199.008	329.526	275.845			138.876	125.363	128.689	149.144	132.073	125.406	127.944	146.219	176.146	158.077	187.74	125.899	125.186	155.558	165.138	162.285	135.244	133.742	125.359	150.44	169.026			162.003	138.01	158.468
2636.53	284.096	249.326	274.795	271.649	298.85	304.051	243.105	193.055	288.239	227.959	268.65	240.338	299.698	201.959	266.66	208.144	253.336	275.35	198.367	329.681	275.821			138.77	125.379	128.919	148.275	130.468	124.618	127.41	146.634	174.943	157.483	189.318	126.838	126.125	154.239	164.35	160	134.775	133.133	125.359	151.441	168.196			161.195	138.002	159.324
2639.08	284.077	248.41	273.551	271.577	297.965	303.602	243.37	193.142	290.837	228.018	267.183	239.73	300.575	202.058	268.038	208.657	253.381	275.641	198.246	329.929	276.226			138	124.447	127.613	148.463	129.439	124.338	126.337	147.53	175.394	158.244	189.048	126.792	125.575	153.408	164.972	161.12	133.84	132.644	126.055	150.373	168.99			161.906	137.577	159.355
2641.63	284.416	249.856	274.18	271.154	297.376	304.49	244.138	193.951	290.416	227.721	266.489	241.205	299.813	200.992	266.766	207.709	254.088	277.12	197.298	329.15	275.589			139.849	124.291	128.602	148.068	129.776	122.948	127.22	146.741	176.205	158.717	188.735	126.933	125.577	155.398	164.099	163.395	134.11	132.019	125.077	149.411	167.948			163.442	138.489	157.806
2644.17	284.079	249.324	275.652	273.88	298.238	302.263	244.497	194.64	289.262	230.076	266.321	243.052	297.5	201.169	266.843	207.93	254.055	275.626	198.597	329.525	277.152			138.813	125.797	128.933	147.455	131.005	123.591	126.731	146.709	177.258	158.924	188.638	128.166	126.408	155.441	165.288	163.423	134.73	132.405	125.178	151.326	168.608			162.382	138.744	158.705
2646.72	279.826	248.717	275.485	269.109	295.779	302.739	243.133	194.59	287.974	228.118	266.478	239.86	296.877	199.838	263.74	206.046	253.652	275.304	198.335	327.389	275.635			137.637	124.875	126.615	147.534	130.567	122.568	126.94	146.203	174.983	156.575	188.302	126.694	124.515	153.592	162.889	163.378	134.129	132.222	123.866	150.068	167.323			161.678	136.953	159.565
2649.27	280.226	247.12	278.352	272.066	296.453	306.374	240.457	196.098	288.398	228.438	268.654	241.668	298.144	201.892	266.337	207.917	254.547	276.076	199.139	327.557	278.475			138.666	125.364	128.727	149.019	130.254	122.576	126.414	146.943	175.914	157.869	190.457	127.773	125.923	155.458	162.85	162.65	134.713	132.304	124.991	151.706	168.183			162.187	136.397	159.184
2651.81	281.837	247.121	275.57	271.552	295.266	303.521	241.091	194.783	286.478	227.297	264.52	240.502	296.58	199.189	262.202	206.455	253.515	272.648	198.313	327.973	273.487			137.604	123.067	128.173	148.139	130.453	121.965	126.146	147.299	175.174	157.267	186.82	126.578	125.165	155.05	162.58	161.451	132.67	130.613	124.247	150.693	168.177			160.501	135.571	158.096
2654.36	278.139	246.813	276.745	271.726	295.042	302.172	240.059	195.531	288.433	228.379	265.291	240.147	293.101	198.457	263.313	207.236	252.63	273.061	195.652	327.814	275.543			137.55	122.967	127.36	146.99	129.744	122.502	125.805	145.545	173.644	157.51	187.724	125.586	125.069	154.115	163.422	161.75	132.557	132.187	122.769	149.451	167.056			159.059	136.631	158.028
2656.91	278.885	245.121	275.732	271.238	293.918	302.617	240.98	194.999	287.071	227.903	264.675	240.04	292.639	198.59	264.063	207.13	252.537	274.334	197.36	327.229	274.198			136.358	122.383	126.788	147.267	129.834	122.409	125.562	145.369	173.242	157.175	187.433	124.939	124.684	154.661	163.263	160.418	133.374	131.6	124.946	150.128	167.33			160.593	136.298	157.716
2659.45	279.948	245.417	274.131	268.987	295.04	303.684	241.141	193.536	285.637	227.715	265.677	239.491	293.278	197.849	262.928	205.42	251.832	273.183	195.866	326.39	272.404			136.427	123.397	126.426	148.029	128.939	121.425	124.661	144.776	173.594	156.651	187.094	126.617	124.318	153.18	162.57	159.499	134.005	131.688	124.871	149.173	167.894			159.667	136.257	157.166
2662	281.245	246.38	271.889	267.992	294.51	303.099	240.422	191.182	286.911	226.806	264.5	238.584	292.387	199.007	259.867	204.521	251.006	272.398	194.826	324.075	272.034			135.515	122.848	127.64	145.817	129.244	121.357	124.635	144.165	173.387	156.081	187.202	125.723	123.082	150.542	161.525	158.281	132.45	130.159	123.721	148.803	166.814			160.056	136.875	156.268
2664.54	280.274	245.623	274.264	268.534	293.293	302.917	240.619	192.015	288.413	226.897	264.11	239.172	293.177	199.707	260.399	204.642	251.288	271.733	195.276	324.811	269.915			136.248	123.066	127.743	145.448	129.843	121.035	125.172	145.209	174.322	155.389	188.032	125.907	125.097	150.281	160.729	158.269	132.307	129.991	124.701	147.781	165.83			160.749	136.292	157.675
2667.09	280.567	245.63	272.595	270.19	290.679	300.12	240.381	192.485	285.636	225.591	262.742	236.872	291.452	199.435	261.861	205.538	251.847	271.255	196.136	324.114	269.445			136.571	122.912	127.273	146.005	128.658	121.613	125.817	144.104	173.152	156.186	188.504	125.185	125.016	150.542	159.942	158.752	131.621	131.325	123.249	148.392	165.434			159.462	136.077	158.095
2669.64	280.102	244.501	269.831	266.221	289.937	301.078	238.752	194.095	282.184	224.525	262.011	235.838	292.877	199.203	259.512	207.941	249.72	272.265	196.251	322.448	269.843			136.589	122.871	127.173	145.396	127.846	119.776	122.586	143.085	172.705	156.495	188.155	124.387	123.681	150.354	161.237	158.596	131.782	128.469	122.667	148.05	166.434			158.511	136.021	158.074
2672.18	279.958	244.684	270.673	266.308	290.438	297.688	242.665	192.119	284.049	225.949	262.435	235.498	290.503	198.4	260.232	203.841	249.484	270.313	194.155	322.663	270.374			135.034	122.476	123.908	143.575	126.438	120.562	125.333	143.318	170.857	153.506	183.445	124.363	123.408	150.199	159.233	157.628	132.765	129.569	122.534	146.649	166.635			157.115	135.939	155.824
2674.73	281.214	245.416	270.403	265.015	290.311	297.571	241.913	192.257	283.673	224.744	262.666	237.443	290.572	197.214	261.099	203.9	250.28	269.855	195.892	325.437	269.676			135.539	121.923	124.684	144.376	127.575	120.186	125.351	144.407	171.857	153.051	184.092	124.574	123.963	150.555	160.111	157.269	130.643	129.945	122.511	145.724	165.111			159.093	134.562	154.559
2677.28	280.428	245.873	269.248	265.685	289.346	298.18	240.5	191.281	283.174	224.948	262.949	237.989	288.488	199.187	259.95	203.797	249.64	269.848	194.862	324.826	270.293			134.558	120.951	125.452	144.477	127.221	120.453	124.048	142.053	170.475	153.007	186.085	124.16	123.098	150.231	159.061	157.881	130.937	129.664	122.178	145.494	163.512			157.965	134.806	155.825
2679.82	282.408	246.514	271.283	266.208	288.876	297.419	240.905	192.771	282.075	225.077	262.291	238.054	287.325	198.349	260.289	202.823	250.011	268.806	193.827	323.039	269.171			133.553	121.261	125.28	144.049	126.849	120.774	123.157	142.781	171.247	153.27	184.462	124.51	124.36	149.983	158.239	158.116	131.612	129.636	122.013	144.908	164.085			158.012	134.015	155.755
2682.37	282.426	244.856	271.135	267.427	288.886	296.027	238.942	192.565	281.256	224.493	261.134	237.927	288.321	197.466	259.624	202.454	249.522	267.603	193.388	325.189	268.283			133.06	120.628	125.466	143.283	126.795	119.896	122.645	143.202	171.499	153.348	183.276	124.632	124.078	148.488	157.118	157.386	130.458	128.801	120.815	144.39	162.803			156.702	133.377	154.198
2684.92	281.571	244.787	272.512	265.434	290.122	296.211	238.874	192.729	283.08	225.087	262.284	237.906	288.326	198.286	259.259	202.764	249.138	265.545	194.378	323.931	269.472			134.366	120.577	125.617	143.489	126.912	119.848	123.548	144.621	170.499	154.382	184.781	124.459	124.096	148.627	158.027	156.536	130.709	130.139	120.61	144.678	162.867			158.142	133.977	153.574
2687.46	279.566	242.365	270.539	267.221	289.347	296.609	241.114	192.882	285.158	226.654	261.076	239.163	288.17	197.925	257.947	202.538	251.127	267.496	193.957	323.157	268.874			134.914	121.566	125.715	142.666	128.503	120.309	123.659	144.447	171.532	152.457	184.961	124.772	123.223	148.593	157.274	156.647	130.002	128.86	121.801	144.347	163.427			159.441	132.863	154.031
2690.01	281.026	245.085	271.507	269.085	289.287	300.451	240.052	194.898	285.922	228.744	261.84	239.944	288.105	198.837	260.465	205.638	250.717	267.955	195.532	321.617	271.726			133.986	121.702	125.495	142.856	127.66	120.078	122.757	142.905	172.231	153.566	187.72	125.484	123.663	150.032	159.311	157.165	132.661	129.663	121.472	146.978	162.583			158.531	134.811	154.702
2692.56	280.284	244.854	273.008	267.091	289.262	300.278	239.149	195.584	282.706	227.025	262.718	242.206	287.479	200.69	259.16	203.417	249.676	266.729	193.406	320.823	268.707			132.786	119.653	125.549	143.475	126.479	119.146	123.928	141.941	171.188	153.134	186.316	124.551	123.385	150.182	157.344	157.247	129.519	130.403	121.338	143.952	163.59			157.704	132.489	154.769
2695.1	281.119	244.184	271.502	269.094	288.932	299.041	239.419	196.827	281.906	225.994	262.324	244.669	288.38	199.925	259.24	200.139	249.395	267.069	192.619	322.932	266.715			132.634	120.014	123.074	142.905	125.102	118.524	122.467	140.619	171.515	151.061	185.216	125.528	123.722	147.635	157.508	155.135	128.602	130.184	120.975	143.448	162.796			158.359	132.965	154.505
2697.65	281.928	244.404	272.754	271.679	289.05	297.897	238.46	199.653	283.173	230.125	262.351	247.68	286.855	199.679	258.306	200.417	250.438	267.025	192.432	323.81	268.224			133.188	119.915	123.774	142.511	125.005	118.556	122.255	141.757	172.423	152.594	183.825	124.881	123.331	148.374	157.638	155.878	128.807	130.726	119.67	142.739	162.207			157.709	132.445	154.909
2700.2	280.328	245.306	275.612	272.039	290.818	298.757	239.131	201.991	283.279	231.597	261.269	249.622	284.885	199.647	257.689	201.347	251.662	267.157	192.219	322.29	269.306			132.138	119.48	124.139	143.162	127.228	119.985	122.41	141.838	173.138	153.945	182.834	125.52	124.482	147.71	157.718	156.053	130.313	131	120.364	143.187	161.713			158.949	131.918	153.8
2702.74	282.419	245.923	277.637	275.122	293.409	301.678	241.789	204.869	285.438	233.757	263.034	253.929	286.606	200.84	259.19	202.992	254.062	268.047	192.444	323.936	271.268			131.263	120.31	124.529	143.181	126.732	120.368	121.467	142.057	173.862	154.291	184.864	126.327	125.744	147.443	156.055	155.618	130.177	130.113	120.522	144.106	162.681			159.378	132.599	155.2
2705.29	283.951	247.726	279.348	278.024	293.763	304.907	243.99	206.458	286.226	238.226	260.908	256.766	288.159	201.163	260.285	201.426	254.742	267.954	193.712	323.645	271.268			131.753	120.173	124.075	143.481	126.5	119.083	123.065	143.115	174.458	153.807	184.125	126.895	126.922	147.432	156.209	155.865	130.454	132.171	120.141	145.996	163.347			160.61	133.313	154.312
2707.84	287.448	249.162	281.305	282.913	298.26	309.445	241.834	211.525	287.815	242.467	263.89	263.841	289.745	203.71	263.068	204.525	256.8	270.215	193.927	327.435	273.995			132.817	118.61	125.443	142.953	126.005	119.046	121.678	141.973	174.68	155.389	185.8	128.119	128.098	147.753	156.926	158.657	130.583	133.09	120.89	144.763	161.685			159.628	132.793	154.111
2710.38	284.641	249.135	284.547	285.489	297.408	310.614	245.104	214.793	288.23	240.509	264.399	268.123	290.03	203.643	261.738	202.117	259.892	269.71	194.526	327.49	273.506			131.906	118.207	125.048	141.341	126.331	120.617	122.645	140.614	176.455	155.55	183.353	128.268	127.169	147.328	155.311	157.575	129.61	132.793	120.344	142.038	162.999			158.929	134.052	157.826
2712.93	285.79	251.242	288.601	289.341	301.823	312.28	247.027	219.326	292.041	247.001	267.077	273.918	290.543	207.293	264.453	204.347	264.2	271.689	195.143	329.603	277.213			133.342	119.876	125.054	143.616	125.429	118.447	123.18	143.521	176.97	156.242	182.958	128.972	128.953	145.701	157.484	157.2	129.928	134.255	118.559	143.915	163.08			161.848	133.548	156.405
2715.48	287.556	252.563	290.822	293.453	304.325	318.074	251.468	224.547	296.325	250.474	267.708	280.47	291.983	209.04	265.97	204.204	265.261	274.964	199.046	332.773	278.3			132.991	119.865	124.839	144.741	127.335	120.313	123.838	144.551	179.253	158.425	183.845	130.216	131.389	147.672	156.911	158.522	129.601	135.873	118.852	142.965	162.466			163.611	133.171	155.456
2718.02	290.039	257.502	298.308	299.942	308.663	322.133	256.252	229.216	302.395	257.82	268.772	286.616	291.411	212.719	269.007	208.115	269.782	275.36	198.771	334.67	282.867			136.278	122.379	125.401	146.538	131.207	121.081	125.148	148.592	182.275	158.846	187.281	131.848	132.804	148.337	158.694	160.437	132.472	138.32	120.285	144.387	163.036			166.452	133.885	157.442
2720.57	294.026	259.693	303.614	304.478	312.305	328.823	257.521	231.585	301.526	263.12	271.837	289.091	292.289	218.204	273.658	213.736	275.2	278.882	201.223	337.368	286.563			137.243	122.859	129.279	147.698	133.634	123.894	125.759	149.76	182.741	163.703	196.631	134.068	135.858	150.76	160.726	163.674	133.838	140.522	122.846	147.522	166.333			166.283	136.811	159.046
2723.11	293.507	261.693	303.537	305.311	315.461	332.544	258.602	233.065	301.943	264.092	273.026	288.187	294.734	219.924	273.666	216.84	277.589	282.842	205.509	337.994	287.869			135.865	119.897	129.629	146.265	131.14	122.89	124.39	146.646	180.902	165.883	197.321	133.57	135.444	149.344	158.496	162.628	133.49	138.639	122.963	148.295	166.82			165.568	137.764	162.7
2725.66	291.537	261.344	301.252	305.728	314.981	330.989	259.774	231.386	300.224	262.851	273.601	286.274	294.48	219.672	273.347	214.267	276.704	282.929	205.933	339.043	286.646			135.462	120.22	128.14	144.855	129.669	121.201	123.719	147.101	180.458	162.164	189.901	132.866	134.415	148.376	157.034	161.226	131.713	137.74	122.671	146.573	165.844			163.511	135.113	162.277
2728.21	291.19	259.841	298.595	300.128	314.975	329.686	258.758	228.014	301.049	261.483	272.351	280.645	294.056	219.026	272.85	215.13	280.265	287.409	206.417	339.811	287.706			134.442	119.223	127.625	146.067	129.79	121.407	125.369	145.457	180.077	162.392	188.363	131.564	133.895	146.653	156.815	160.441	131.352	136.292	122.329	144.212	166.507			161.813	133.857	161.262
2730.75	290.486	259.098	297.231	299.088	314.262	328.798	256.761	222.116	298.144	258.271	273.5	274.832	295.795	219.407	272.194	219.726	278.244	288.241	207.771	335.617	285.265			135.564	119.841	126.678	144.962	129.361	120.61	125.15	143.955	180.029	161.036	188.076	130.336	132.204	148.458	157.449	160.657	131.864	136.815	122.981	145.814	166.562			163.736	134.785	159.168
2733.3	288.484	260.401	297.161	298.188	312.902	329.554	256.394	218.048	297.501	254.233	273.063	266.971	292.678	219.48	271.014	220.002	278.259	288.715	209.65	335.765	283.648			135.544	119.223	128.395	145.466	128.614	120.317	124.831	145.969	179.557	160.589	188.275	130.426	131.653	148.04	158.39	160.498	132.456	135.804	122.429	145.442	166.414			164.138	134.399	159.811
2735.85	289.088	260.278	292.253	295.167	308.81	326.373	256.083	214.712	297.79	249.376	272.223	263.214	292.558	217.567	272.313	220.737	276.606	288.461	210.784	336.63	282.7			135.044	119.493	128.035	144.993	127.557	120.938	125.525	145.402	178.402	159.803	187.992	129.604	131.862	148.549	157.714	159.836	131.605	135.485	122.136	145.216	165.803			163.319	134.506	158.225
2738.39	289.137	259.67	292.428	293.47	307.556	324.119	257.269	211.591	298.216	246.108	272.116	260.058	293.753	217.632	272.68	221.08	275.443	289.201	209.977	334.886	282.094			135.184	119.466	127.225	144.216	128.405	120.158	125.041	145.403	177.242	159.084	187.474	128.924	129.888	148.171	157.007	161.042	131.077	133.716	122.282	146.546	166.67			163.818	134.286	158.585
2740.94	287.611	258.352	290.009	290.982	304.115	321.962	257.118	210.592	294.247	244.781	272.294	256.947	294.632	216.686	271.072	221.096	276.752	289.665	211.533	331.771	280.709			136.026	120.364	126.379	145.543	128.419	121.938	125.118	144.443	176.211	159.135	186.76	129.261	128.99	148.641	157.131	161.864	132.033	133.09	123.597	147.094	167.716			164.543	134.279	159.379
2743.49	288.325	259.681	290.595	288.879	304.838	321.208	258.662	210.003	294.092	243.869	271.774	254.374	294.605	216.191	269.275	223.329	275.823	290.742	210.707	333.411	281.308			137.071	121.172	126.421	147.186	128.628	122.145	126.196	146.184	177.791	158.678	185.351	129.611	128.957	148.732	157.439	161.098	131.59	133.602	122.791	146.4	167.929			164.077	133.473	159.335
2746.03	292.507	261.64	291.399	289.665	302.767	317.732	257.114	209.46	297.781	242.627	274.634	253.918	293.277	215.801	272.878	223.139	275.9	288.65	212.432	335.476	283.154			135.772	122.552	126.438	148.506	131.902	123.156	127.02	148.655	176.995	158.678	189.007	129.905	131.371	150.124	160.575	161.67	134.512	135.476	123.251	148.341	168.989			165.411	133.694	160.321
2748.58	291.528	258.692	288.263	287.708	304.547	321.903	256.65	206.113	292.604	240.067	272.747	251.035	293.928	215.573	271.556	222.025	275.617	289.479	210.117	335.48	281.392			135.232	120.701	129.799	146.12	129.592	121.144	125.814	144.576	178.006	160.251	195.038	127.51	129.891	150.993	160.205	162.641	133.401	133.101	124.029	147.907	169.365			164.391	138.738	158.314
2751.13	289.228	258.501	287.824	285.447	302.83	315.155	257.61	205.986	293.551	240.743	271.116	251.864	294.883	211.968	270.316	219.4	275.346	290.172	209.751	333.902	279.609			134.928	121.036	126.64	145.842	128.318	121.395	124.843	145.131	176.26	158.269	186.899	127.255	127.888	150.418	158.309	161.731	130.105	132.372	122.823	146.052	167.288			163.136	134.372	158.855
2753.67	289.758	258.374	286.325	285.877	302.689	317.75	257.1	206.292	295.615	239.175	270.731	251.562	295.335	211.824	270.415	218.587	274.559	287.881	210.281	334.96	280.291			136.503	121.039	126.831	146.52	127.436	121.836	125.319	146.621	178.373	157.232	187.25	128.442	129.324	149.281	158.954	162.037	131.517	132.923	122.584	145.857	165.911			163.035	135.649	157.79
2756.22	290.693	260.165	287.455	284.857	302.925	317.647	258.161	207.384	297.525	240.644	271.436	252.932	295.994	213.951	272.674	218.839	274.623	289.287	210.826	333.513	281.915			137.14	121.723	128.206	146.774	129.418	121.375	126.453	147.684	176.863	159.454	186.846	128.476	128.766	150.635	159.577	162.107	132.886	132.521	123.122	145.434	165.743			165.127	137.18	159.098
2758.77	291.208	260.723	287.076	285.469	302.042	315.202	257.68	206.428	296.05	240.633	271.866	253.761	296.089	213.223	270.785	218.935	274.727	289.917	209.96	334.601	283.183			136.46	121.862	128.097	146.671	130.176	121.771	127.26	146.055	177.932	158.924	188.541	129.391	128.348	151.475	160.321	161.974	133.629	133.46	123.118	145.928	168.119			165.48	135.876	159.543
2761.31	291.238	261.486	287.193	285.24	302.568	315.88	259.078	207	296.689	241.357	273.848	253.906	297.079	212.362	271.301	219.597	275.719	289.489	209.902	336.622	282.943			137.015	122.289	127.879	146.244	128.684	121.483	126.206	147.591	177.99	158.527	189.673	128.961	127.857	150.065	160.67	161.403	133.651	133.309	123.573	147.701	168.905			165.586	135.402	159.378
2763.86	292.198	261.071	288.465	285.379	301.95	319.076	259.078	208.917	298.096	242.123	273.983	252.522	295.737	216.687	273.149	221.962	277.224	289.357	211.507	339.301	283.728			137.062	121.174	128.371	147.628	129.794	122.937	125.845	146.331	178.932	159.477	187.336	129.226	129.238	151.239	161.292	164.432	133.638	132.83	123.179	146.262	168.2			165.511	136.128	158.237
2766.41	292.475	262.427	292.709	288.155	304.267	321.28	261.502	208.985	300.599	241.439	274.49	253.198	297.667	216.561	274.024	219.856	275.876	291.243	210.683	338.191	281.555			137.923	123.988	129.34	147.786	133.385	123.201	128.044	149.853	180.598	159.162	188.493	130.909	132.836	149.836	160.61	161.241	131.64	134.214	124.925	147.481	168.941			166.708	135.335	160.048
2768.95	293.927	265.455	292.625	290.253	307.267	322.189	263.587	211.191	309.216	244.938	278.963	253.922	298.568	219.758	276.769	223.408	281.32	292.469	213.32	338.772	285.747			137.721	123.773	130.098	148.628	134.17	123.499	127.55	149.547	179.551	161.348	195.481	130.543	133.013	152.31	161.468	162.421	134.236	135.528	126.826	149.271	170.847			167.304	135.957	163.46
2771.5	294.337	265.771	293.344	289.872	306.714	324.372	261.666	211.07	303.168	244.267	277.512	253.993	299.055	219.908	276.092	224.043	280.149	292.894	214.008	339.348	285.581			137.315	124.011	130.642	147.839	133.543	125.183	130.008	149.792	180.068	162.374	196.509	130.289	131.688	152.165	162.396	164.084	135.157	136.494	126.125	150.595	171.284			166.658	136.666	162.915
2774.05	293.036	264	291.913	288.08	306.436	325.363	260.062	208.775	298.787	243.967	276.937	252.913	299.524	217.43	273.992	224.562	280.769	294.386	213.587	339.096	286.77			136.156	123.195	130.362	146.952	130.892	123.367	128.275	145.573	179.436	162.396	194.768	129.407	131.687	152.575	161.842	164.504	133.454	134.75	125.78	149.813	170.832			164.172	138.821	160.611
2776.59	292.364	264.592	291.791	287.283	307.049	320.893	261.165	209.329	298.901	243.317	276.318	253.598	299.409	215.714	271.872	222.762	278.099	295.12	212.351	338.386	286.591			137.293	123.402	129.073	147.944	131.307	124.062	127.317	146.749	178.827	160.46	190.66	129.906	130.816	152.452	161.876	163.994	133.861	134.38	124.785	147.855	170.114			166.069	137.003	161.337
2779.14	292.623	262.55	291.596	289.891	307.374	322.05	260.046	207.607	300.528	242.935	278.15	253.971	300.106	215.54	272.409	222.739	276.941	295.638	213.225	338.277	286.107			138.35	122.966	129.06	148.652	132.374	123.752	128.434	147.833	179.852	160.155	190.87	130.754	131.457	152.235	162.02	163.011	133.923	134.464	125.569	149.833	171.185			166.507	136.318	161.313
2781.68	291.289	263.483	291.549	289.83	305.652	321.161	259.397	208.442	300.138	244.556	276.884	254.533	299.46	216.843	273.615	222.333	276.771	296.084	215.057	337.481	286.755			137.429	122.749	129.077	147.393	130.587	123.936	128.037	147.134	178.589	160.966	190.104	131.181	129.337	150.678	161.938	162.928	132.268	133.213	124.651	148.519	170.54			166.09	136.712	163.373
2784.23	293.203	263.64	291.092	289.395	310.739	322.296	259.399	208.356	300.141	243.74	278.226	254.21	300.83	216.879	273.409	224.934	275.938	295.375	214.455	340.958	289.419			137.413	123.705	129.822	147.882	131.472	124.169	127.604	147.764	180.852	159.915	190.594	129.745	129.43	153.004	161.393	163.906	134.417	133.912	124.458	148.725	171.184			165.063	137.005	163.012
2786.78	291.419	264.266	292.989	292.75	308.256	323.611	258.556	209.766	299.995	245.533	276.293	255.166	299.661	214.726	273.145	222.003	277.612	295.728	214.296	338.02	287.286			136.306	123.387	129.256	147.298	130.52	123.368	128.231	148.024	180.184	159.199	189.562	130.173	131.259	153.315	161.156	164.033	135.18	134.654	125.058	147.654	171.728			164.18	135.727	160.862
2789.32	293.034	263.158	293.342	291.801	310.977	321.853	261.164	209.051	301.87	245.831	277.169	257.167	301.01	214.995	274.706	220.964	274.403	295.733	214.076	340.034	289.013			137.9	123.158	129.062	149.377	131.389	123.372	128.351	148.68	182.038	161.257	190.39	130.582	130.699	152.8	162.881	164.757	135.667	134.483	126.597	149.359	171.98			166.301	136.944	161.185
2791.87	294.132	262.322	295.85	292.777	310.8	323.037	259.367	210.319	304.464	247.432	277.984	257.628	301.202	215.612	275.208	222.74	276.736	295.417	214.625	340.926	287.143			138.498	123.501	130.412	149.366	132.826	124.836	128.41	148.796	182.567	160.443	191.427	130.782	130.742	152.259	162.959	166.513	135.16	136.067	126.879	151.429	172.472			166.119	136.294	160.943
2794.42	295.039	263.966	296.21	292.657	311.454	325.332	259.285	209.36	303.286	248.748	279.748	257.656	301.573	216.188	276.196	224.081	277.42	296.808	214.636	341.491	288.267			137.612	124.336	129.187	149.918	131.474	123.987	128.182	147.275	184.328	161.255	191.861	131.076	131.243	153.476	163.62	166.79	135.103	135.873	126.233	150.814	173.596			166.76	137.314	162.262
2796.96	294.953	266.086	295.19	293.895	312.348	325.489	260.96	209.365	303.979	249.374	280.304	259.156	301.963	216.503	275.844	223.978	277.347	295.627	214.063	340.981	291.725			138.487	123.333	128.795	150.328	132.15	124.694	127.966	147.954	183.883	160.602	192.125	130.224	130.894	153.734	163.931	166.2	135.185	136.759	126.087	150.519	173.695			166.444	137.85	162.449
2799.51	296.228	267.467	296.319	295.723	312.545	325.925	261.817	212.371	303.959	251.168	278.694	262.365	303.383	217.195	275.894	226.492	276.091	297.994	213.753	342.087	290.284			139.627	123.791	129.294	150.547	131.754	124.555	128.663	148.529	183.787	161.284	191.612	131.67	132.691	153.764	164.937	165.722	133.366	136.069	126.674	149.469	172.552			166.998	138.597	162.584
2802.06	298.854	267.117	300.133	297.681	312.811	330.233	266.204	215.778	308.205	251.165	281.631	263.154	303.588	216.797	278.136	222.511	282.546	298.323	215.079	345.132	293.726			140.782	122.974	131.508	151.325	133.746	124.304	129.755	150.079	185.739	163.796	192.366	132.568	134.279	154.513	164.137	167.597	135.529	136.491	126.612	151.039	172.244			169.302	139.117	162.609
2804.6	297.532	267.955	301.36	299.819	313.953	329.784	267.446	214.633	312.579	254.163	283.129	265.017	305.198	221.551	280.153	223.036	282.012	298.517	217.742	344.565	293.76			139.935	124.681	130.932	151.534	133.426	124.989	130.106	152.178	186.177	163.963	192.969	133.724	134.517	155.302	165.172	165.79	135.045	137.383	127.22	151.246	172.819			169.584	137.705	163.644
2807.15	300.648	270.154	302.125	301.555	317.424	335.206	269.071	217.689	309.809	255.454	282.923	268.618	305.635	221.621	281.826	227.236	285.017	300.208	218.483	347.718	295.288			140.45	125.115	131.189	151.449	131.32	126.087	130.646	150.04	184.772	164.575	196.095	133.829	134.689	156.046	166.585	169.367	135.96	138.512	128.681	152.769	173.93			168.374	139.462	165.501
2809.7	302.483	274.102	303.058	305.093	319.07	335.887	269.235	222.657	309.95	258.951	284.597	272.363	307.617	221.626	282.749	228.65	286.712	301.222	219.307	347.78	298.715			139.641	124.014	129.974	151.77	131.973	126.152	130.803	148.763	185.571	163.094	192.452	134.065	136.117	155.156	164.569	168.017	135.237	137.479	128.25	152.002	174.359			168.184	138.939	165.767
2812.24	301.86	275.756	307.37	308.307	320.251	337.403	272.891	225.2	311.517	260.362	286.327	275.54	307.281	223.871	283.623	229.099	289.931	303.514	219.297	351.684	299.333			140.477	123.811	129.944	152.988	133.085	126.786	131.471	151.468	188.081	163.375	192.38	134.589	136.936	154.128	164.66	168.759	136.587	140.076	128.838	150.868	174.405			170.967	138.849	164.93
2814.79	304.637	278.021	311.954	313.738	324.052	343.006	275.503	228.348	313.723	264.448	290.885	281.485	310.808	229.286	285.126	232.506	293.529	308.323	221.446	352.984	301.699			142.547	125.571	131.199	154.262	136.085	127.824	131.828	153.67	190.741	168.16	196.163	135.543	137.965	155.94	166.859	170.775	137.862	141.627	130.107	152.827	174.893			172.081	140.165	165.377
2817.34	306.812	279.234	317.805	319.719	327.724	346.457	280.732	233.879	316.763	267.245	292.008	289.062	310.031	231.143	286.439	233.198	294.204	312.454	224.887	353.334	303.198			141.427	126.137	132.716	154.278	134.239	127.642	133.471	151.573	192.217	168.246	196.706	138.052	141.307	155.659	165.992	169.748	138.92	141.963	128.865	153.86	175.613			171.699	141.856	167.594
2819.88	307.314	282.827	319.936	322.159	328.296	347.193	281.762	239.212	318.402	271.948	293.322	295.543	313.343	231.242	287.86	235.214	298.437	314.731	227.529	355.288	306.802			142.459	125.341	133.39	153.432	133.806	127.398	131.981	152.581	193.48	168.82	197.261	137.786	141.652	155.558	164.716	171.245	138.481	142.842	128.898	151.314	177.632			174.526	139.461	167.609
2822.43	310.858	285.765	329.746	334.545	336.17	358.117	287.006	248.807	322.691	279.73	295.149	307.919	315.578	235.697	291.524	240.719	305.156	316.078	229.657	359.222	313.632			145.307	127.025	133.292	155.883	138.181	128.66	134.154	155.532	196.326	171.735	198.114	142.423	143.252	158.887	168.383	173.013	140.332	144.932	130.583	154.343	180.732			176.037	141.15	169.757
2824.98	313.15	292.499	338.991	348.585	341.376	366.208	289.949	261.135	325.545	288.171	299.455	325.368	318.083	240.769	294.705	244.904	309.629	322.815	234.769	364.608	317.367			145.323	126.898	135.073	156.707	138.483	130.096	134.536	154.122	199.35	173.499	200.938	144.533	147.187	158.056	168.539	175.143	140.701	149.1	131.307	155.158	178.467			179.262	143.11	171.545
2827.52	317.667	295.443	353.175	366.438	352.192	375.875	297.335	277.5	331.599	301.549	304.028	351.452	320.194	245.398	299.215	249.438	319.345	329.45	239.769	369.933	325.532			145.454	128.18	136.306	156.628	140.456	131.702	136.304	156.187	205.212	176.338	202.647	149.163	152.598	159.25	168.118	177.262	141.377	151.698	132.601	157.377	180.472			181.67	143.974	173.788
2830.07	322.478	299.849	377.883	392.959	368.025	392.628	302.089	300.96	338.94	322.096	308.421	392.252	324.501	251.969	303.484	254.756	328.099	336.484	245.304	375.033	335.947			147.658	129.386	137.495	158.586	142.708	132.238	137.967	161.128	213.032	179.527	204.543	154.644	159.993	158.933	168.964	182.256	143.037	157.418	132.904	159.091	183.077			185.934	145.662	177.312
2832.61	326.49	307.567	407.769	435.26	388.175	416.346	310.896	345.065	351.77	352.44	312.603	454.319	328.009	259.396	310.013	261.849	339.526	347.407	251.361	383.314	354.026			151.494	129.988	139.036	161.822	148.352	135.746	140.62	162.81	224.622	185.15	210.358	162.627	170.986	160.232	170.46	187.531	144.461	165.061	134.258	160.522	185.048			193.568	146.45	181.931
2835.16	331.55	317.523	456.433	493.429	417.399	453.918	318.82	396.727	364.313	396.55	320.28	542.645	332.6	268.697	315.298	268.336	356.571	355.785	260.417	394.443	376.338			154.548	131.603	142.294	163.035	155.557	139.233	141.784	165.753	241.283	191.379	219.293	175.614	184.108	160.477	169.991	194.627	145.73	177.848	136.798	165.829	185.954			201.526	146.875	187.815
2837.71	337.324	328.887	509.36	568.653	463.135	501.638	328.669	468.877	388.968	455.439	329.178	658.3	341.595	281.536	325.894	282.936	380.55	370.302	268.123	409.259	402.601			156.338	130.74	144.454	164.767	155.734	140.341	142.272	167.028	259.245	203.68	229.249	191.355	199.959	163.369	173.334	203.5	148.076	191.558	138.484	168.115	188.656			208.056	151.623	198.737
2840.25	349.378	343.263	577.774	653.723	521.813	560.835	344.418	555.215	421.391	529.913	334.732	778.811	351.33	298.252	335.75	291.949	408.328	387.15	281.186	427.049	439.333			161.277	132.464	149.255	167.754	162.366	143.093	144.089	171.366	283.572	219.966	234.472	209.809	219.689	164.198	173.677	213.986	150.63	209.281	139.322	172.616	191.849			220.331	152.87	211.132
2842.8	362.689	358.338	642.364	734.24	582.61	629.981	362.21	630.354	449.669	603.662	344.538	874.666	359.166	321.174	351.418	304.945	445.38	403.757	297.388	450.344	476.911			166.202	133.563	153.595	172.011	169.586	146.634	149.5	177.251	305.148	235.061	247.511	225.03	239.524	165.262	176.134	225.034	153.247	229.283	141.765	178.157	194.66			233.157	154.711	225.027
2845.35	374.1	375.1	682.812	790.487	643.559	690.947	381.513	677.379	479.151	664.579	356.3	925.394	364.805	342.027	369.897	320.977	486.741	425.959	314.361	471.216	503.841			169.575	134.131	158.463	175.52	171.109	150.294	150.26	179.377	318.678	250.848	259.176	235.876	251.721	166.713	175.997	236.547	157.406	244.386	144.894	182.94	198.266			239.445	158.86	238.989
2847.89	388.455	390.725	700.992	816.627	685.552	730.759	405.876	692.981	500.732	704.523	368.736	929.212	372.839	363.211	382.856	333.852	522.014	445.782	329.081	488.397	520.912			171.827	134.646	160.81	177.369	173.785	154.465	154.394	184.608	323.961	259.342	265.511	241.672	259.085	167.927	176.478	243.848	161.313	252.011	147.314	184.224	201.313			244.173	161.665	247.687
2850.44	401.801	405.715	698.201	811.839	703.369	754.384	426.327	684.342	512.32	709.968	380.15	903.359	378.885	384.332	398.658	347.274	553.109	462.244	343.548	503.426	524.078			174.418	136.572	165.164	181.22	178.413	156.911	159.075	190.395	318.108	264.738	271.778	245.13	258.837	170.43	179.7	244.431	164.273	255.374	149.949	187.037	204.574			248.368	164.574	253.195
2852.99	418.881	424.118	688.665	796.248	699.768	754.616	456.046	666.57	518.827	701.641	396.41	860.919	385.915	402.484	413.474	363.495	575.321	478.699	354.734	514.923	520.162			177.666	138.991	167.795	182.123	180.149	158.271	162.409	195.228	314.535	262.063	274.035	241.719	258.575	171.313	181.188	245.168	168.626	254.521	152.505	189.902	211.085			254.399	168.511	253.555
2855.53	428.73	444.325	685.448	779.999	681.953	744.755	482.121	655	513.713	683.671	412.941	828.854	392.955	419.981	426.773	382.041	588.431	499.447	364.596	525.833	519.505			179.536	142.146	170.714	185.401	185.905	165.498	168.366	202.294	313.92	266.132	272.89	242.296	262.083	173.726	184.06	247.332	173.562	252.085	156.552	191.559	216.175			258.023	171.264	255.736
2858.08	443.582	465.126	685.118	781.139	668.2	745.142	512.989	650.58	517.395	674.667	430.11	811.712	403.033	439.213	445.212	399.179	610.946	519.38	382.045	538.442	525.679			182.157	143.252	173.396	189.177	188.052	168.108	173.085	207.548	315.93	267.646	275.035	245.235	266.087	177.617	185.434	249.185	177.001	252.806	161.26	194.025	223.973			264.168	174.69	256.486
2860.63	459.966	492.076	700.769	791.667	662.684	752.774	546.901	654.917	522.649	674.223	452.739	807.312	414.942	462.401	464.374	426.53	636.956	547.53	404.106	553.741	534.337			187.276	147.243	177.025	192.524	195.425	173.507	180.84	216.055	320.265	273.784	275.684	250.81	274.559	180.207	189.173	253.044	182.767	257.582	166.582	197.626	231.312			275.811	179.5	259.742
2863.17	478.514	524.463	722.876	814.4	665.657	770.845	592.905	673.035	529.597	680.91	479.337	816.256	430.421	491.288	487.531	456.649	672.474	584.416	432.051	573.374	548.321			192.335	150.156	183.123	196.275	200.909	180.195	190.066	225.536	329.79	283.108	281.048	259.007	283.992	184.487	192.585	258.814	187.638	261.953	174.686	200.975	241.417			285.756	184.52	266.235
2865.72	505.541	562.615	758.256	851.254	679.482	802.346	640.541	700.035	544.637	697.884	506.76	845.071	448.596	531.042	518.969	493.182	717.538	626.093	467.39	598.419	572.985			197.955	155.598	187.177	202.008	210.249	188.788	200.13	237.332	341.696	292.166	286.008	269.232	300.114	186.407	197.845	267.239	194.624	271.709	184.005	209.1	252.837			300.324	192.092	275.202
2868.27	526.953	592.153	798.915	904.314	696.758	846.39	679.536	729.663	563.009	733.31	540.836	881.679	464.648	565.211	548.85	542.133	765.403	675.388	502.613	626.087	596.639			207.707	159.538	196.292	208.778	217.989	195.635	208.392	246.455	355.084	306.989	295.42	281.681	311.064	195.055	201.63	280.695	201.817	279.143	191.449	216.876	266.36			313.469	197.404	288.2
2870.81	544.621	624.548	865.674	976.221	734.089	900.695	711.268	788.474	585.317	778.114	562.955	962.928	487.628	608.094	574.637	585.325	821.147	731.821	548.594	656.743	636.685			215.011	163.68	204.094	211.88	226.392	203.388	218.788	255.367	373.603	322.566	303.843	294.397	331.21	198.579	205.412	294.284	207.68	294.482	201.075	226.206	279.069			323.281	204.37	301.642
2873.36	562.18	643.72	941.907	1073.22	782.697	967.015	729.773	870.485	611.98	840.825	580.198	1098.77	504.396	638.304	595.495	635	869.61	786.063	591.964	678.81	676.843			225.207	168.676	212.457	214.123	233.353	208.363	227.928	261.757	402.68	339.487	315.451	312.97	353.576	203.453	210.483	313.046	211.658	312.48	209.536	234.712	289.815			334.982	211.634	316.288
2875.91	573.093	661.853	1056.99	1207.56	852.905	1052.38	738.403	1001.87	646.151	947.45	591.853	1290.03	522.318	663.643	611.506	678.685	910.119	839.129	632.898	701.543	730.183			237.526	171.838	219.409	218.808	243.141	213.987	234.831	268.986	446.874	359.175	329.901	339.414	387.279	204.988	212.602	336.136	215.275	337.94	215.701	244.303	300.53			348.53	216.426	336.508
2878.45	579.743	674.203	1168.26	1335.71	953.909	1172.99	744.372	1117.16	692.483	1084.75	600.286	1433.16	537.34	684.88	623.746	718.766	951.397	886.459	670.04	728.231	796.112			248.096	175.329	228.015	222.236	252.703	219.084	240.264	274.139	495.532	386.655	348.814	365.501	420.222	206.894	216.486	362.793	216.876	366.855	220.017	255.523	307.245			360.744	218.309	358.467
2881	584.551	677.574	1196.9	1355.87	1061.64	1264.4	746.999	1140.33	732.044	1178.91	604.683	1398.48	540.368	706.574	634.791	747.183	1001.91	927.024	701.422	751.684	837.849			255.194	177.516	235.189	224.787	254.652	221.437	242.279	275.973	511.001	423.075	368.282	371.319	424.174	207.035	218.716	387.796	220.228	382.216	224.736	266.967	312.252			360.698	220.139	383.923
2883.55	583.878	674.403	1120.92	1261.14	1100.35	1261.88	748.901	1050.18	751.647	1156.87	598.265	1225.55	536.361	715.164	635.219	765.907	1031.15	947.976	717.385	743.56	822.934			252.856	178.489	242.01	220.377	247.52	217.744	241.458	272.934	480.516	433.237	377.242	355.187	399.732	206.981	219.436	391.024	219.981	370.681	224.69	269.942	310.352			350.232	221.824	392.41
2886.09	580.391	669.31	1009.18	1132.55	1035.82	1182.89	752.649	919.715	733.163	1057.1	597.984	1031.59	527.219	712.138	632.347	758.19	1010.47	938.999	714.373	723.688	761.706			247.676	177.186	240.163	222.263	242.244	216.343	241.352	275.959	434.808	404.28	371.82	330.164	369.234	207.073	218.057	377.552	220.295	340.641	225.067	265.119	309.048			340.73	220.215	375.49
2888.64	580.213	666.559	915.603	1017.46	936.776	1090.31	757.249	821.841	680.883	942.833	598.932	897.452	518.358	699.533	629.528	748.464	968.475	923.789	693.544	712.09	714.402			239.52	177.33	234.757	219.543	236.027	215.72	239.925	273.011	404.86	379.324	358.103	309.281	346.953	207.555	217.964	356.56	219.848	316.563	224.072	253.311	308.879			334.02	218.674	354.237
2891.19	584.372	666.348	858.984	950.603	853.245	1016.55	769.22	772.477	640.811	862.689	603.255	829.522	513.777	690.452	631.009	734.903	941.632	910.092	678.594	703.953	683.984			234.718	175.588	229.037	218.329	233.482	214.502	237.571	271.922	389.431	360.718	342.321	298.661	338.881	206.948	218.096	341.369	219.905	306.624	223.251	249.146	309.238			334.706	218.674	338.795
2893.73	589.688	672.467	836.05	922.503	802.925	973.196	779.098	748.517	624.127	822.582	609.538	802.274	511.445	690.666	634.971	724.793	936.583	895.236	670.415	702.425	672.455			231.939	175.347	224.971	217.675	232.925	214.529	240.141	273.698	383.328	352.827	328.949	295.331	337.093	206.763	216.474	329.433	222.478	303.17	221.592	245.313	308.224			337.615	218.609	330.564
2896.28	595.663	683.036	827.832	913.83	776.206	959.213	793.729	741.325	622.344	804.52	618.014	788.509	512.535	699.135	645.584	723.449	943.62	892.136	667.271	707.398	668.859			229.415	175.595	223.896	220.433	236.595	216.741	241.866	278.086	381.432	352.227	325.329	296.599	339.374	207.089	217.757	324.206	223.291	302.044	220.896	245.767	308.67			340.556	220.253	326.092
2898.82	603.39	697.779	826.772	915.444	764.514	958.669	811.452	740.754	619.963	801.6	631.667	777.558	518.421	711.469	654.49	728.034	956.496	893.968	666.376	716.563	668.729			227.892	174.798	224.383	221.303	237.01	218.156	244.922	278.641	380.338	352.855	327.372	296.939	338.74	209.053	218.954	323.805	226.323	305.335	224.038	245.659	310.725			344.023	221.654	326.178
2901.37	611.888	709.422	831.31	912.596	758.835	964.913	832.291	743.751	623.738	793.607	641.845	772.435	525.135	725.621	661.973	734.656	976.94	909.528	677.256	722.093	673.741			228.114	176.131	224.263	220.089	239.355	221.007	245.513	282.16	382.105	353.303	328.408	299.455	343.437	210.396	218.29	323.775	229.395	303.861	224.293	244.965	313.284			347.078	224.176	328.95
2903.92	620.712	726.973	837.647	921.697	759.933	968.652	859.493	744.154	625.398	794.479	658.018	769.654	528.862	742.351	670.392	744.95	991.727	922.956	691.739	734.769	682.03			230.586	176.074	224.294	225.356	242.568	224.508	251.433	287.896	386.457	357.958	327.446	303.787	347.692	212.646	222.161	324.27	234.037	303.808	226.829	246.473	319.335			353.035	226.419	329.513
2906.46	633.997	753.116	853.864	935.495	759.959	980.877	892.259	749.591	630.833	797.554	677.191	766.211	540.163	761.403	689.059	766.016	1013.1	944.965	709.633	745.971	689.588			234.514	179.258	229.91	228.997	246.679	228.934	256.598	294.988	389.732	361.139	329.557	307.615	353.769	215.442	224.268	327.559	236.548	308.161	232.957	249.466	326.142			363.371	230.946	334.171
2909.01	647.349	778.309	872.907	952.625	764.109	999.274	931.111	760.092	640.087	807.955	701.036	770.263	555.43	784.763	711.539	791.507	1043.87	977.091	730.901	762.728	703.147			237.047	182.715	232.818	232.89	252.816	236.24	265.349	304.322	395.588	367.764	334.045	316.27	364.403	216.641	226.034	334.141	241.16	315.186	237.831	253.482	335.591			371.298	235.442	340.223
2911.56	668.092	813.167	896.434	981.31	773.322	1023.72	976.012	773.362	651.813	816.964	727.613	775.92	569.837	814.637	734.465	825.475	1079.57	1019.67	761.951	784.97	724.212			244.425	187.465	236.705	236.522	260.483	242.886	275.845	315.822	400.896	377.25	339.686	322.863	375.013	219.941	229.153	340.525	247.241	322.102	246.465	258.61	343.849			380.973	239.762	349.113
2914.1	688.551	849.539	933.184	1016.2	784.077	1050.79	1016.74	793.14	666.234	834.073	757.972	784.76	588.802	849.841	761.196	867.419	1123.51	1068.23	801.869	809.181	746.115			252.205	194.026	244.109	241.411	268.44	248.962	285.67	330.331	411.194	386.976	344.281	331.598	389.698	225.064	232.567	351.686	253.39	327.862	253.803	265.808	355.547			393.27	244.19	358.428
2916.65	708.274	882.466	967.342	1057.54	805.221	1089.33	1058.49	809.829	677.705	852.423	786.664	799.55	606.423	881.274	790.191	915.32	1169.12	1122.29	845.985	832.266	776.925			260.699	198.161	255.607	246.518	277.091	256.892	297.563	335.64	418.643	397.827	355.719	341.069	398.219	229.666	238.215	367.179	261.202	334.213	263.059	275.108	368.746			403.044	253.363	370.333
2919.2	725.875	910.22	1006.97	1102.77	835.407	1129.34	1096.69	825.286	696.728	876.435	815.905	813.399	625.284	916.991	817.09	968.526	1218.92	1183.11	896.177	853.962	806.965			270.315	202.28	261.401	250.674	283.346	262.176	310.525	347.46	429.183	412.389	365.525	349.577	410.727	233.948	243.795	379.141	266.568	340.405	273.318	284.169	383.869			412.309	261.391	382.809
2921.74	740.593	942.611	1050.11	1143.65	860.653	1172.62	1126.09	836.462	711.527	894.706	835.849	822.326	647.521	945.263	839.219	1025.46	1261.13	1240.82	945.962	872.289	833.431			281.246	209.429	269.092	253.648	291.63	269.97	321.672	358.353	438.433	422.843	374.097	355.827	418.914	237.745	247.366	394.141	274.448	348.859	285.088	294.834	398.637			422.338	266.471	397.24
2924.29	754.059	965.279	1090.65	1191.61	894.856	1218.95	1155.26	853.216	724.406	916.456	857.449	832.691	667.195	975.802	863.177	1086.7	1301.82	1304.81	996.447	885.925	862.626			291.464	214.688	277.885	257.968	298.04	277.747	331.684	367.179	445.58	435.767	384.666	361.609	426.759	242.194	253.035	410.513	279.633	353.17	293.624	303.403	413.32			429.294	272.72	408.888
2926.84	764.658	987.468	1130.14	1237.05	924.883	1257.24	1176.56	866.97	736.813	934.03	878.4	841.063	684.346	996.547	880.12	1140.09	1334.5	1367.94	1042.03	901.963	887.807			300.597	218.15	284.351	260.17	303.506	280.877	341.907	374.804	454.618	444.767	393.145	365.541	433.878	246.69	257.16	424.145	284.476	356.081	303.819	313.949	425.709			436.648	275.861	421.184
2929.38	776.884	1007.1	1164.78	1278.54	954.315	1295.22	1189.5	872.982	745.279	955.903	893.436	847.564	696.42	1015.87	893.442	1191.28	1368.04	1426	1087.39	912.358	911.719			312.521	225.453	291.833	263.676	310.056	282.807	353.864	380.516	462.866	453.899	399.071	368.512	437.148	252.031	261.16	440.721	285.941	361.17	312.276	321.063	437.357			441.787	278.769	429.96
2931.93	781.58	1015.28	1190.6	1311.27	981.177	1330.73	1200.53	875.99	755.436	962.936	905.402	843.665	718.464	1029.52	907.375	1245.63	1391.06	1469.97	1132.23	920.043	938.924			320.743	227.269	297.189	266.386	312.8	286.563	360.155	385.833	464.268	463.69	408.003	370.899	440.649	252.213	263.993	453.824	288.923	363.314	321.707	332.283	448.966			445.762	281.198	442.532
2934.48	787.232	1025.47	1220.2	1341.35	1010.6	1361.06	1206.41	869.155	762.736	970.463	914.273	834.103	728.953	1040.13	914.379	1291.98	1417.77	1530.07	1176.99	925.733	964.164			328.706	233.187	305.172	266.612	314.911	291.525	369.368	388.979	468.551	469.267	414.961	370.384	442.388	254.89	267.871	467.976	292.195	362.181	327.659	340.331	463.513			444.849	284.845	454.649
2937.02	782.369	1022.47	1228.14	1352.9	1029.73	1382.34	1190.18	854.301	765.115	965.559	910.437	809.205	735.218	1038.77	914.003	1332.01	1421.42	1569.82	1209.92	919.114	968.375			335.665	234.693	307.402	264.081	314.624	289.587	373.88	387.128	465.399	472.605	415.825	365.958	435.147	255.07	268.592	477.672	291.407	359.006	334.802	347.537	468.163			438.252	285.723	457.928
2939.57	771.929	1003.05	1220.45	1351.93	1041.85	1389.89	1167.6	828.536	755.973	947.595	895.917	779.543	734.034	1021.22	905.152	1362.96	1411.79	1597.63	1232.85	906.866	964.996			340.789	236.445	309.701	262.12	311.835	285.898	374.561	384.367	457.423	469.227	418.545	356.22	426.789	254.187	269.19	486.78	287.72	350.421	339.331	353.344	469.926			429.98	285.602	460.643
2942.12	749.638	973.598	1204.69	1321.44	1038.28	1379.48	1125.31	794.352	740.603	915.055	872.974	741.791	726.716	995.395	879.93	1365.01	1386.87	1600.73	1243.21	883.048	948.917			341.949	237.718	310.159	259.226	307.858	280.925	372.511	377.449	440.661	461.924	418.327	343.624	409.398	249.483	268.258	486.376	282.632	338.848	338.867	354.977	469.295			416.214	282.54	459.485
2944.66	732.979	945.803	1172.3	1284.66	1034.73	1352.14	1080.64	754.755	722.375	888.89	851.485	700.659	715.913	964.918	859.079	1367.94	1359.11	1594.7	1236.4	855.757	929.405			336.845	236.026	309.671	252.23	297.597	274.255	364.286	366.518	429.058	452.019	419.005	330.87	395.004	246.724	265.291	484.559	277.333	323.886	337.704	355.088	464.243			407.041	276.375	453.766
2947.21	705.017	911.367	1125.01	1227.67	1007.34	1311.32	1032.94	713	701.58	844.38	825.342	661.671	696.717	919.303	824.914	1333.1	1301.12	1559.97	1208.91	826.845	900.768			330.454	232.467	302.086	248.89	290.932	266.375	356.277	355.517	413.384	437.868	407.557	318.385	377.734	242.909	261.483	471.258	267.405	312.268	327.719	348.251	453.921			392.053	270.71	443.911
2949.76	679.141	874.568	1077.34	1177.79	973.267	1256.96	988.663	681.603	676.075	805.506	792.127	634.48	679.388	879.928	794.295	1292.43	1241.45	1502.88	1167.89	796.829	867.605			319.591	226.808	292.316	242.691	280.518	259.242	344.341	344.115	403.463	419.909	395.687	308.432	363.713	238.623	257.664	460.741	258.886	301.353	317.553	338.275	439.642			377.982	259.472	429.869
2952.3	658.009	845.235	1031.07	1127.98	940.498	1210.3	952.878	658.528	657.997	771.584	771.298	614.776	660.531	842.225	766.419	1244.76	1195.41	1458.31	1130.16	772.765	839.539			310.173	219.883	281.616	237.611	272.781	251.938	333.13	335.661	393.519	407.722	386.676	297.969	353.38	233.651	252.434	446.28	253.894	292.871	307.983	331.957	427.021			371.897	253.417	415.105
2954.85	640.691	822.346	991.516	1082.1	906.384	1161.51	924.394	636.864	641.609	747.647	754.605	601.55	643.098	817.747	750.869	1186.99	1157.68	1403.43	1083.66	755.399	814.729			299.997	214.573	273.935	233.342	265.796	246.792	325.701	329.059	383.876	396.653	376.147	292.511	344.05	230.023	249.777	433.47	249.973	288.683	299.321	321.391	415.107			365.649	248.727	401.854
2957.39	629.626	808.08	957.463	1041.63	878.522	1120.91	907.325	626.796	630.749	731.908	740.176	593.281	631.782	803.848	738.423	1139.2	1134.53	1354.36	1041.79	748.135	791.031			290.776	209.443	266.742	230.895	261.562	242.258	315.864	322.136	377.967	384.828	369.953	287.988	338.429	226.151	247.455	417.582	246.237	283.485	291.316	311.499	404.221			358.761	242.824	389.166
2959.94	622.867	787.862	923.926	1001.03	851.248	1090.07	891.719	614.568	623.191	716.485	727.493	579.868	614.044	788.4	734.061	1091.52	1107.96	1309.15	1004.29	735.126	768.469			279.119	206.983	260.411	228.935	256.498	236.995	309.355	317.626	374.233	377.423	362.992	282.868	333.522	224.513	241.191	400.884	245.065	280.16	284.226	304.866	393.349			354.906	240.31	379.513
2962.49	614.567	771.784	897.291	969.764	822.543	1057.09	868.317	598.831	614.411	698.983	714.432	570.821	602.76	776.224	721.697	1049.06	1084.5	1262.39	970.532	725.872	750.568			273.45	201.904	252.482	227.231	251.85	234.609	302.136	311.337	363.165	373.582	353.895	279.989	327.072	221.305	238.853	390.238	241.956	277.202	276.244	295.616	382.868			352.792	238.676	370.852
2965.03	606.518	758.552	876.115	942.026	802.165	1029.4	855.29	584.946	604.442	685.034	703.598	557.505	596.232	766.607	710.704	1016.59	1067.91	1227.28	942.471	721.03	732.803			268.72	197.29	247.91	226.697	247.203	231.445	296.138	309.219	357.882	368.237	349.595	274.991	323.128	219.904	236.63	379.388	239.799	274.581	271.758	289.441	376.618			345.769	236.615	361.742
2967.58	599.057	744.837	857.045	918.73	776.908	1007.65	837.55	573.121	594.101	666.664	696.372	545.585	588.394	756.037	701.966	989.44	1049.84	1202.14	920.442	711.284	717.054			263.64	196.11	246.065	225.64	245.466	230.842	292.785	303.569	354.013	359.384	346.62	270.325	319.243	217.583	234.329	370.502	238.688	270.108	265.32	283.895	368.449			339.897	233.767	354.979
2970.13	592.122	730.066	841.43	901.137	758.792	984.195	819.969	559.494	586.933	653.646	685.279	535.407	581.302	743.509	692.141	963.838	1026.74	1174.09	897.007	698.205	704.79			260.334	194.187	243.329	222.824	240.926	228.149	288.081	300.67	349.005	356.698	342.115	265.278	312.773	216.26	231.531	364.697	232.916	264.689	260.359	278.803	363.771			337.001	231.954	348.239
2972.67	578.011	720.067	833.608	890.884	746.816	965.775	800.57	551.815	579.332	643.129	675.001	521.018	577.552	730.775	683.39	941.499	1008.23	1151.36	882.915	690.482	697.849			258.855	192.829	237.701	219.895	239.204	225.04	284.96	298.522	344.113	353.511	337.652	264.153	309.394	215.939	229.551	360.748	231.305	262.985	258.602	276.265	362.954			330.032	227.01	343.626
2975.22	576.498	704.702	823.94	886.67	736.562	952.371	788.629	539.525	572.714	626.634	666.515	509.073	570.733	713.793	669.196	932.345	986.447	1141.46	876.896	680.056	692.505			258.854	192.015	235.9	219.268	237.78	221.634	283.741	293.084	340.649	346.283	334.03	258.43	305.211	214.252	230.152	352.96	228.473	257.221	256.799	273.583	357.572			324.086	225.266	338.668
2977.77	563.672	692.266	823.715	880.862	732.78	941.095	768.934	527.39	565.303	618.137	654.259	499.038	568.879	698.299	654.351	930.033	964.614	1129.31	870.845	662.637	686.651			259.608	192.897	233.998	216.66	236.451	220.781	281.323	289.584	336.656	342.972	330.635	253.713	297.759	214.069	230.53	355.044	226.143	253.148	255.995	273.167	355.808			319.136	223.408	339.304
2980.31	552.979	677.049	817.494	869.536	729.779	932.526	743.942	514.236	554.971	600.614	642.123	488.003	562.137	678.593	637.392	924.839	936.628	1115.55	858.542	649.723	672.673			258.536	192.732	231.372	215.048	231.257	217.055	278.548	285.871	332.151	338.791	329.188	249.019	289.386	211.543	229.263	354.243	221.156	247.145	254.743	273.142	353.153			311.085	220.986	335.52
2982.86	539.607	657.878	811.006	859.812	725.133	918.22	720.555	500.205	545.677	588.886	626.507	476.144	557.713	656.511	623.177	916.865	912.244	1100.61	852.609	635.578	662.64			258.101	192.199	230.154	211	229.162	213.54	275.415	279.87	326.779	333.016	325.622	242.092	281.132	209.756	227.47	350.615	218.394	241.612	251.096	270.998	349.931			303.481	217.969	333.97
2985.41	527.572	636.814	792.892	842.372	716.462	897.265	693.039	483.61	536.237	571.277	608.647	459.328	548.08	633.012	604.652	903.303	881.518	1075.33	837.626	616.778	653.244			256.033	190.818	227.665	208.008	223.24	208.336	270.504	274.5	317.205	323.668	323.594	235.693	273.573	208.723	225.728	348.636	212.853	234.726	246.591	270.075	347.313			295.036	214.18	326.813
2987.95	509.21	614.217	767.043	816.292	703.569	874.851	660.461	464.517	521.959	549.31	585.844	441.142	532.045	602.331	577.679	879.012	843.857	1043.92	817.373	598.712	632.58			250.506	186.005	224.915	205.133	218.338	202.53	260.487	264.722	308.302	312.664	317.756	228.815	263.067	205.219	223.155	339.947	208.431	228.943	241.922	265.839	337.802			286.026	208.944	319.265
2990.5	492.028	590.409	741.521	786.982	686.898	846.929	631.093	443.726	507.483	532.383	565.373	425.267	517.66	576.52	559.375	852.5	809.956	1009.9	791.808	578.886	612.418			246.691	183.868	221.479	201.499	213.808	198.737	253.89	257.927	302.011	303.765	311.349	221.717	251.871	203.976	220.884	329.941	202.614	219.93	234.654	259.875	329.283			277.335	203.285	315.191
2993.05	477.737	564.978	709.743	753.041	665.247	812.842	599.164	423.993	492.087	509.788	542.498	410.4	505.402	547.281	534.715	818.855	770.204	962.254	753.95	558.239	589.786			239.44	179.656	215.992	196.748	206.479	191.5	244.621	249.036	292.995	294.097	300.638	214.255	243.072	198.6	216.076	320.775	198.24	214.204	228.634	254.666	319.484			268.178	199.862	305.256
2995.59	459.329	540.211	676.667	716.574	640.857	775.625	566.628	404.111	480.167	487.186	519.816	395.517	489.722	516.198	511.984	778.102	730.448	912.287	713.755	539.277	566.523			231.85	176.246	209.621	192.827	198.732	185.929	234.615	238.886	283.676	283.342	293.713	206.795	233.018	195.424	212.832	310.198	193.86	205.997	221.891	247.448	307.746			259.905	194.985	292.957
2998.14	444.9	515.65	642.976	678.105	618.117	739.26	537.654	383.787	466.374	464.813	497.998	379.637	472.851	487.576	491.672	735.045	694.611	860.551	673.312	522.213	540.353			224.711	171.47	203.209	188.758	193.371	179.798	225.311	232.215	272.655	274.468	284.797	199.386	222.194	192.783	209.205	298.041	187.16	201.031	213.852	237.978	297.564			251.522	189.826	283.746
3000.69	430.991	494.272	610.184	639.893	585.501	701.005	508.072	365.862	450.839	444.987	477.465	369.394	454.677	460.633	469.439	687.004	653.446	808.226	627.69	503.545	515.619			216.786	166.978	197.537	187.435	186.919	173.176	218.476	223.456	264.635	262.301	277.004	193.616	212.549	188.905	205.346	284.684	181.888	192.504	205.6	229.524	286.234			241.593	185.275	272.608
3003.23	418.797	469.103	574.878	604.398	563.887	662.995	486.908	349.22	439.629	429.164	460.458	357.128	442.107	441.052	454.654	642.87	620.191	757.088	587.929	491.189	495.34			208.187	162.267	191.672	185.97	183.841	169.587	206.658	215.521	256.45	252.438	269.245	187.494	206.359	185.52	202.971	273.788	180.173	187.934	198.783	223.947	276.06			236.264	181.529	262.16
3005.78	403.819	450.479	543.811	567.065	533.974	626.738	462.769	332.237	427.556	406.959	439.749	343.523	424.752	415.361	436.336	597.102	586.884	705.075	546.513	476.954	471.428			201.42	158.756	184.304	181.942	176.779	165.185	197.395	208.342	248.241	243.707	261.81	182.288	199.005	183.526	196.794	260.725	175.548	182.977	189.329	216.066	264.423			229.588	177.021	252.384
3008.33	394.485	430.578	514.263	535.905	508.293	591.722	440.18	319.338	415.243	392.655	421.782	335.176	410.878	395.871	420.247	553.015	558.103	656.898	508.605	462.42	450.215			194.207	154.549	180.378	180.095	171.798	160.022	188.97	202.225	242.602	234.357	253.978	176.208	191.474	181.433	196.093	250.826	172.234	177.782	184.31	208.021	254.962			222.964	172.186	241.764
3010.87	383.108	414.81	489.256	504.713	487.689	561.32	423.618	305.389	405.92	376.254	407.841	325.402	401.342	375.946	406.909	514.057	531.527	617.229	471.666	450.644	431.211			187.083	150.909	175.168	177.155	166.834	157.074	181.801	195.91	236.985	228.129	248.3	171.862	186.406	179.154	193.715	242.522	169.142	174.218	178.115	202.475	246.336			218.949	169.894	233.467
3013.42	374.741	400.447	466.283	476.159	464.921	529.039	406.289	294.184	395.013	362.31	393.565	317.091	386.784	360.724	394.977	477.41	506.382	576.843	438.487	439.875	414.38			180.61	148.835	169.95	176.302	164.038	154.248	175.613	191.476	231.238	219.796	242.036	167.49	179.715	177.227	189.284	232.995	164.327	169.145	169.881	195.748	237.395			215.501	167.472	225.165
3015.96	367.541	386.35	443.738	451.273	443.808	506.408	391.203	281.641	385.409	348.03	381.634	308.926	374.245	346.817	381.225	445.158	486.17	538.539	413.181	429.576	399.803			175.084	145.643	164.538	174.693	159.802	152.626	171.564	183.685	226.97	215.902	235.924	164.162	176.508	173.881	187.281	226.069	162.082	166.223	165.02	190.299	229.257			211.572	163.74	218.963
3018.51	359.288	373.092	421.018	433.04	424.085	482.649	377.709	273.118	377.824	335.76	370.148	303.561	367.982	332.71	370.989	414.909	466.886	511.908	387.149	420.469	388.471			171.125	142.208	161.113	172.224	156.921	148.479	163.923	180.878	221.358	207.963	229.04	160.683	171.093	171.85	185.838	217.265	160.542	162.182	159.837	184.193	224.026			207.047	161.601	211.096
3021.06	352.738	365.405	406.698	415.264	409.057	464.101	366.066	266.509	374.368	327.681	359.968	297.722	362.146	320.988	364.006	392.899	450.334	485.615	363.791	413.224	375.102			167.204	139.815	158.048	171.174	154.702	146.6	160.095	178.597	218.649	204.157	225.246	158.728	168.334	171.21	184.505	210.816	159.015	160.772	156.523	181.474	219.245			203.324	160.35	207.177
3023.6	346.132	356.581	393.922	398.751	397.197	446.533	357.045	260.997	365.88	319.752	353.581	293.249	355.783	312.985	356.869	370.229	432.282	461.075	346.443	408.094	367.889			163.218	137.995	155.871	169.855	151.326	144.976	157.922	175.677	214.921	201.732	220.874	156.845	164.021	171.25	182.172	205.428	156.66	159.061	154.367	179.045	213.231			200.299	158.951	201.866
3026.15	341.98	349.579	381.857	384.038	385.883	432.607	352.626	256.315	358.652	310.956	347.296	291.94	349.003	304.259	350.736	350.663	420.274	440.969	331.325	401.542	358.177			160.87	137.979	152.298	170.185	150.567	143.081	155.632	173.845	212.592	197.716	217.13	154.731	161.954	169.563	180.669	202.02	155.649	157.255	152.359	174.058	210.984			199.192	157.06	197.488
3028.7	341.056	345.28	375.774	377.016	380.009	421.921	346.531	252.045	356.502	306.878	343.028	286.802	345.864	299.964	346.655	337.71	408.749	428.721	316.996	401.204	354.183			157.181	137.242	150.871	168.666	150.084	142.317	153.644	170.378	212.146	196.031	218.786	153.717	160.886	169.563	179.875	198.511	154.551	157.138	150.563	173.832	207.795			198.135	157.375	197.276
3031.24	339.164	340.892	367.465	371.23	371.94	415.704	345.4	252.374	353.602	301.041	339.592	288.04	342.93	295.792	344.434	329.248	400.798	414.076	309.367	397.553	348.523			157.761	136.528	149.627	170.345	153.227	143.795	152.03	170.854	208.242	192.393	217.008	153.033	161.791	169.611	179.016	196.075	153.348	156.196	148.87	171.13	204.736			198.586	155.977	191.282
3033.79	339.356	340.852	363.779	367.261	364.617	409.471	344.908	250.706	352.344	299.236	339.586	289.285	340.366	295.017	343.275	320.58	397.087	406.008	301.322	395.439	347.04			156.217	135.588	150.215	169.101	151.349	143.402	151.931	172.604	210.866	191.948	216.96	153.202	160.598	168.036	179.1	193.624	153.977	157.514	148.077	170.917	205.926			199.173	155.8	191.905
3036.34	340.826	340.069	362.88	364.044	360.283	405.482	346.457	250.457	353.436	299.046	339.191	288.042	339.007	296.121	343.582	315.07	395.04	401.333	297.468	395.028	343.578			154.696	135.346	148.071	168.989	151.798	143.648	150.863	172.423	210.068	192.95	215.676	152.929	161.136	169.044	179.143	193.397	154.418	156.01	148.267	169.85	204.923			198.243	155.696	190.196
3038.88	338.89	340.548	359.879	358.987	358.123	402.264	346.572	247.694	352.485	297.898	337.966	286.998	337.699	297.743	342.528	311.42	392.096	400.219	292.446	394.541	342.018			153.213	134.367	147.862	166.359	149.759	142.616	150.504	170.988	209.414	191.185	215.736	151.836	161.372	168.591	177.896	191.191	152.896	156.504	147.376	169.206	203.264			196.506	155.119	189.571
3041.43	339.138	340.764	357.624	357.452	352.492	402.018	348.763	250.321	350.51	297.011	340.081	286.925	338.178	299.257	339.633	305.559	392.625	396.639	291.369	395.908	342.448			152.985	135.164	145.188	168.02	150.309	142.96	149.184	169.184	210.581	189.239	213.175	151.986	159.375	169.418	178.785	190.297	152.499	155.839	146.16	166.813	201.041			196.853	155.532	190.43
3043.98	343.419	340.608	358.451	357.546	352.455	400.021	350.173	250.669	351.036	298.875	337.814	288.988	335.822	302.936	342.573	304.92	393.301	394.295	289.017	396.512	340.183			153.237	134.144	146.924	167.556	149.256	142.59	150.259	170.346	210.158	189.946	212.436	152.548	162.135	167.262	177.083	191.233	153.927	155.6	146.056	167.213	201.146			196.566	156.968	189.806
3046.52	342.404	341.542	358.001	358.347	352.188	397.782	352.379	250.834	352.562	297.719	340.406	289.405	336.186	302.961	342.961	303.646	391.701	393.153	289.399	396.303	340.442			152.474	134.428	147.402	167.105	150.083	143.06	150.79	171.769	210.901	189.843	209.893	153.508	163.11	167.972	179.229	190.584	153.648	157.442	146.103	167.046	201.325			195.751	156.707	188.491
3049.07	344.35	343.212	356.923	358.719	350.291	399.048	357.663	255.552	351.987	299.902	342.348	292.588	339.147	305.485	344.863	304.334	394.341	394.495	289.597	396.934	339.865			151.953	134.777	147.001	168.016	151.183	144.72	150.799	171.815	211.249	190.801	212.527	155.696	163.33	167.931	179.16	189.406	154.113	157.693	146.451	167.413	202.645			197.779	156.334	188.34
3051.62	347.988	349.694	358.774	360.839	349.531	402.619	364.064	259.524	352.046	301.377	344.561	294.989	340.256	310.745	347.333	304.441	396.431	394.445	290.444	401.063	342.093			152.1	134.686	147.264	168.424	150.535	146.321	151.595	173.346	213.42	192.434	213.789	156.332	165.772	169.404	177.614	189.724	155.29	157.818	146.956	166.226	203.362			199.864	158.054	188.277
3054.16	356.082	355.484	364.812	365.077	351.036	407.518	373.38	262.849	355.165	305.704	350.539	296.928	338.358	320.324	354.672	308.562	402.828	400.675	294.405	410.648	345.984			153.373	136.317	149.161	169.939	154.35	147.27	152.443	176.155	215.666	195.318	212.262	158.745	169.945	171.567	179.593	190.231	158.533	162.673	148.087	167.284	204.609			204.085	158.413	189.3
3056.71	357.065	362.377	368.132	367.811	352.002	411.888	379.676	265.47	358.786	311.662	351.316	300.237	341.738	327.637	356.871	315.426	411.343	407.236	296.883	414.437	348.488			153.658	135.182	150.317	170.33	155.696	148.972	152.986	178.557	216.682	198.322	214.523	160.621	170.799	171.416	181.504	192.136	157.953	162.206	148.03	167.553	207.605			206.02	160.606	192.48
3059.26	359.127	362.918	369.624	371.431	355.488	416.617	384.354	267.932	360.539	312.965	356.108	302.105	341.102	332.444	360.694	319.416	416.069	411.685	299.872	415.97	350.925			153.388	135.329	150.58	169.831	155.898	148.201	154.343	177.71	217.15	199.727	214.274	159.437	171.348	172.197	179.581	193.535	157.001	164.736	149.555	169.396	207.413			204.688	160.427	194.503
3061.8	361.039	363.077	369.283	372.026	354.957	418.365	382.066	267.121	361.369	313.112	354.247	300.239	342.598	337.023	362.242	320.287	418.767	415.073	302.009	416.374	351.725			153.537	134.492	151.412	169.844	155.466	148.154	152.373	176.008	217.17	199.663	214.178	160.448	172.339	172.201	179.803	194.05	157.402	164.499	151.18	170.36	208.892			202.889	161.604	195.248
3064.35	360.573	359.654	365.671	369.244	355.505	417.823	376.851	261.814	360.185	312.048	349.75	298.592	341.242	335.391	359.88	320.86	419.555	415.689	302.827	417.306	349.85			153.201	134.484	152.038	168.357	154.465	147.901	151.411	175.551	214.22	197.641	213.271	159.602	170.407	171.243	181.154	193.756	158.319	163.317	151.599	169.316	208.395			201.498	161.879	195.262
3066.9	354.665	352.707	362.353	363.283	353.109	415.155	367.239	256.802	354.35	311.212	345.827	292.774	337.505	329.348	355.921	318.953	413.196	414.013	302.583	411.195	346.819			152.235	133.706	150.367	167.764	153.962	146.218	150.905	172.936	210.899	195.64	211.844	157.418	167.24	169.7	180.114	192.124	156.252	161.079	150.056	167.896	206.508			198.248	162.933	194.794
3069.44	343.649	339.746	352.333	354.046	348.334	407.013	350.506	248.276	353.066	297.785	336.682	284.846	331.259	318.175	344.553	311.462	400.887	404.058	294.893	403.225	338.477			151.327	134.438	149.964	164.308	148.433	144.044	148.839	167.902	206.876	194.61	210.985	152.804	161.021	168.318	178.261	190.661	152.705	157.985	148.746	167.752	205.275			191.42	157.438	191.065
3071.99	337.001	329.368	344.861	346.695	347.946	398.226	338.343	242.67	346.315	292.169	326.468	277.448	327.724	304.053	336.669	308.094	390.936	396.15	289.811	392.673	335.222			151.787	132.484	147.533	165.417	147.462	141.143	147.528	166.076	204.353	189.402	207.191	149.667	158.362	168.095	177.144	191.087	151.614	154.211	145.827	165.726	201.7			190.779	157.594	190.649
3074.53	326.468	318.423	337.495	337.846	341.253	386.276	325.496	232.963	339.226	283.639	317.582	270.473	322.501	290.534	326.218	297.553	375.566	386.406	281.554	382.36	328.342			148.817	132.051	146.179	163.224	145.17	138.372	144.071	164.326	200.783	184.925	207.601	147.487	153.669	165.945	174.586	186.866	148.951	151.324	144.857	165.257	196.821			187.04	154.128	184.313
3077.08	319.86	309.738	329.133	327.727	337.479	377.095	313.615	224.964	332.86	275.301	309.043	262.666	319.246	277.974	317.268	288.543	363.123	375.739	272.763	374.707	324.497			147.905	131.885	144.11	162.046	144.364	137.301	140.762	161.765	197.433	181.984	206.93	143.604	150.377	163.064	173.553	186.495	147.887	147.75	143.007	163.244	194.263			184.532	149.577	181.796
3079.63	312.124	302.039	322.49	321.643	330.981	365.023	301.988	220.238	327.636	266.833	301.385	258.43	314.485	266.222	308.83	282.099	350.675	365.229	267.994	366.981	316.318			146.242	130.844	142.225	161.359	142.522	133.512	140.666	159.118	195.982	180.332	206.674	141.481	147.292	161.47	172.848	183.517	145.974	145.823	140.709	161.865	192.153			181.652	149.876	180.339
3082.17	307.235	292.53	317.4	316.031	328.473	360.067	297.228	214.5	323.495	262.939	296.933	252.881	310.526	256.857	305.675	276.112	341.854	355.895	262.475	362.175	312.301			147.254	128.282	138.913	159.069	139.349	132.049	138.37	153.703	192.099	176.172	201.876	139.875	144.647	160.995	168.835	180.625	144.601	143.215	138.552	160.212	188.412			179.556	147.147	177.431
3084.72	302.079	287.705	312.5	308.746	322.788	349.324	286.716	210.95	320.471	257.358	291.37	248.931	304.683	248.463	299.573	269.018	333.973	346.467	256.049	353.124	309.672			144.218	128.73	136.854	158.229	138.896	131.863	138.598	155.29	189.16	172.071	197.356	138.499	142.346	158.403	168.534	179.202	142.244	140.787	136.884	158.161	184.667			177.882	145.348	173.434
3087.27	294.934	281.339	307.488	305.118	317.704	342.56	278.206	206.464	314.022	251.096	286.074	243.045	301.519	240.394	292.542	263.642	325.068	339.303	248.262	346.079	304.119			142.867	127.272	137.893	157.836	137.175	131.052	137.103	152.808	187.203	172.072	199.744	136.754	141.356	156.815	167.95	177.09	142.056	139.276	136.143	157.055	183.722			175.189	144.652	170.913
3089.81	291.806	277.546	301.595	298.612	315.713	337.789	275.518	201.577	311.684	247.509	281.983	241.294	298.935	234.663	288.83	258.403	318.789	333.444	245.454	340.393	300.673			141.525	127.202	136.513	155.79	136.01	129.224	134.235	150.681	185.727	171.07	197.001	135.367	139.944	155.628	166.601	175.434	140.229	137.526	135.097	155.557	181.601			173.789	144.683	170.736
3092.36	291.647	275.384	300.426	296.31	310.996	334.322	273.845	201.114	310.01	244.029	279.81	238.494	297.255	231.263	286.86	252.451	314.819	329.5	240.77	336.733	299.759			142.926	126.437	135.216	154.997	137.567	128.402	134.574	152.806	185.131	166.437	193.721	134.908	139.177	155.789	164.616	176.415	139.059	137.62	133.438	155.276	180.814			173.719	142.08	168.07
3094.91	288.925	274.407	295.548	296.878	312.667	332.842	270.332	198.569	306.256	241.979	278.638	236.992	296.137	230.431	285.366	249.726	314.067	325.85	239.319	335.53	295.636			141.824	125.189	134.862	154.732	135.605	128.951	133.519	149.677	185.827	167.952	196.362	134.108	138.038	156.635	166.348	174.694	139.152	135.496	133.551	155.101	180.206			172.656	141.593	170.745
3097.45	286.57	272.083	292.486	293.705	308.61	327.062	268.506	198.242	304.718	239.662	277.806	236.189	295.961	226.043	281.756	248.191	308.134	321.918	236.369	333.709	294.994			140.407	125.38	133.203	154.719	132.405	127.706	131.539	148.381	184.665	165.338	191.041	132.501	137.871	154.783	164.514	173.06	138.24	135.71	133.115	153.85	179.211			172.816	141.403	167.082
3100	285.546	270.148	291.873	290.678	306.77	325.706	267.295	198.407	305.094	236.832	275.284	235.219	295.629	223.131	281.181	245.814	307.197	319.228	233.871	330.66	294.353			139.809	125.657	132.589	154.57	133.219	126.736	130.754	148.769	184.827	165.091	190.267	131.598	135.996	154.29	163.906	174.009	138.608	135.169	132.101	154.278	178.592			171.985	139.602	166.008
[truncated: 34 more columns]
